# Supplementary material for: Ornaments are equally informative in males and females: a bivariate meta-analysis in birds
Source: Research Square preprint supplement (doi:10.21203/rs.3.rs-1141520/v1), 2021-12-15
Supplement: Supplementary file 2 [file f13bf02b6df433d98ec026d0.xlsx]

## Sheet: DataFile
data_type	unique_indentifiers	year_code	year	authors	scientific_names	common_names	dimorphism_Cohend	dimorphism_CohendSE	study_type	trait	trait_parameter	overall_parameter	specific_parameter	detail_notes	good_fem	good_male	zr_fem	zr_se_fem	zr_male	zr_se_male
PAIRED	WOS:000398573200008	2017	2017	Blizard, Misha and Pruett-Jones, Stephen	Actitis macularius	Spotted sandpiper	-1.962	0.264049	correlational	plumage ventral spots	size	Body Condition	parasites	parasite abundance	-1	-1	-0.609663	0.185695	-0.303029	0.138675
PAIRED	WOS:000264484100007	2009	2009	Douglas, Hector D., III and Kitaysky, Alexander S. and Kitaiskaia, Evgenia V. and Maccormick, Aidan and Kelly, Anke	Aethia cristatella	Crested auklet	0.0300355	0.0866348	correlational	plumage crest	length	Body Condition	stress	baseline corticosterone	-1	-1	-0.147051	0.267261	-0.647523	0.176777
PAIRED	WOS:000276666600014	2010	2010	Legagneux, Pierre and Thery, Marc and Guillemain, Matthieu and Gomez, Doris and Bretagnolle, Vincent	Anas crecca	Eurasian teal	0.345562	0.0590316	correlational	plumage wing patch	colour contrast	Body Condition	body size	wing length	1	1	0.0914233	0.039163	0.0235544	0.0438108
PAIRED	WOS:000276666600014	2010	2010	Legagneux, Pierre and Thery, Marc and Guillemain, Matthieu and Gomez, Doris and Bretagnolle, Vincent	Anas platyrhynchos	Mallard (captive)	0.802496	0.32891	correlational	plumage wing patch	brightness	Body Condition	body size	body size	-1	-1	-0.622363	0.25	-0.366356	0.223607
PAIRED	WOS:000276666600014	2010	2010	Legagneux, Pierre and Thery, Marc and Guillemain, Matthieu and Gomez, Doris and Bretagnolle, Vincent	Anas platyrhynchos	Mallard (captive)	0.902774	0.332148	correlational	plumage wing patch	colour contrast	Body Condition	body size	body size	1	1	0.429886	0.25	-0.0652926	0.223607
PAIRED	WOS:000276666600014	2010	2010	Legagneux, Pierre and Thery, Marc and Guillemain, Matthieu and Gomez, Doris and Bretagnolle, Vincent	Anas platyrhynchos	Mallard (captive)	0.802496	0.32891	correlational	plumage wing patch	brightness	Body Condition	body condition	mass corrected by size (residuals)	-1	-1	-0.599978	0.25	-0.542825	0.223607
PAIRED	WOS:000276666600014	2010	2010	Legagneux, Pierre and Thery, Marc and Guillemain, Matthieu and Gomez, Doris and Bretagnolle, Vincent	Anas platyrhynchos	Mallard (captive)	0.902774	0.332148	correlational	plumage wing patch	colour contrast	Body Condition	body condition	mass corrected by size (residuals)	1	1	0.431098	0.25	0.352146	0.223607
PAIRED	WOS:000361007700006	2015	2015	van Dijk, Rene E. and Robles, Raquel and Groothuis, Ton G. G. and de Vries, Bonnie and Eising, Corine M.	Apalis thoracica	Bar throated apalis	1.40192	0.362354	correlational	plumage breast band	size	Body Condition	body size	tarsus length	1	1	0.759117	0.258199	0.0316333	0.235702
PAIRED	WOS:000361007700006	2015	2015	van Dijk, Rene E. and Robles, Raquel and Groothuis, Ton G. G. and de Vries, Bonnie and Eising, Corine M.	Apalis thoracica	Bar throated apalis	1.40192	0.362354	correlational	plumage breast band	size	Body Condition	body condition	mass corrected by size (covariate)	1	1	-0.280169	0.258199	0.887341	0.235702
PAIRED	WOS:000362911000005	2015	2015	Keddar, Ismael and Couchoux, Charline and Jouventin, Pierre and Dobson, F. Stephen	Aptenodytes patagonicus	King penguin	0.328683	0.114729	correlational	plumage auricular patch	hue	Body Condition	environment	favourable environmental condition	1	1	0.0684203	0.0813788	0.28285	0.0813788
PAIRED	WOS:000362911000005	2015	2015	Keddar, Ismael and Couchoux, Charline and Jouventin, Pierre and Dobson, F. Stephen	Aptenodytes patagonicus	King penguin	0.243772	0.114384	correlational	plumage auricular patch	saturation	Body Condition	environment	favourable environmental condition	1	1	0.529264	0.0813788	0.66286	0.0813788
PAIRED	WOS:000362911000005	2015	2015	Keddar, Ismael and Couchoux, Charline and Jouventin, Pierre and Dobson, F. Stephen	Aptenodytes patagonicus	King penguin	0.235388	0.114356	correlational	plumage auricular patch	brightness	Body Condition	environment	favourable environmental condition	-1	-1	0.0404116	0.0813788	-0.0484881	0.0813788
PAIRED	WOS:000362911000005	2015	2015	Keddar, Ismael and Couchoux, Charline and Jouventin, Pierre and Dobson, F. Stephen	Aptenodytes patagonicus	King penguin	0.654828	0.116976	correlational	plumage auricular patch	width	Body Condition	environment	favourable environmental condition	1	1	0.662744	0.0813788	0.80089	0.0813788
PAIRED	WOS:000362911000005	2015	2015	Keddar, Ismael and Couchoux, Charline and Jouventin, Pierre and Dobson, F. Stephen	Aptenodytes patagonicus	King penguin	0.4555	0.11543	correlational	plumage auricular patch	interauricular distance	Body Condition	environment	favourable environmental condition	-1	-1	0.111408	0.0813788	0.0726966	0.0813788
PAIRED	WOS:000374383300003	2016	2016	Viblanc, Vincent A. and Dobson, F. Stephen and Stier, Antoine and Schull, Quentin and Saraux, Claire and Gineste, Benoit and Pardonnet, Sylvia and Kauffmann, Marion and Robin, Jean-Patrice and Bize, Pierre	Aptenodytes patagonicus	King penguin	0.0408212	0.288828	correlational	beak	UV brightness	Body Condition	body condition	mass corrected by size (residuals)	1	1	-0.51	0.223607	0.29	0.204124
PAIRED	WOS:000374383300003	2016	2016	Viblanc, Vincent A. and Dobson, F. Stephen and Stier, Antoine and Schull, Quentin and Saraux, Claire and Gineste, Benoit and Pardonnet, Sylvia and Kauffmann, Marion and Robin, Jean-Patrice and Bize, Pierre	Aptenodytes patagonicus	King penguin	0.00867704	0.288799	correlational	beak	yellow orange chroma	Body Condition	body condition	mass corrected by size (residuals)	1	1	0.53	0.223607	-0.06	0.204124
PAIRED	WOS:000374383300003	2016	2016	Viblanc, Vincent A. and Dobson, F. Stephen and Stier, Antoine and Schull, Quentin and Saraux, Claire and Gineste, Benoit and Pardonnet, Sylvia and Kauffmann, Marion and Robin, Jean-Patrice and Bize, Pierre	Aptenodytes patagonicus	King penguin	-0.00480763	0.288798	correlational	beak	UV hue	Body Condition	stress	concentration of reactive oxygen metabolites in breeding individuals as a measure of exposure to oxidative stress	-1	-1	-0.59	0.301511	0.37	0.27735
PAIRED	WOS:000235238000016	2006	2006	Penteriani, V and Alonso-Alvarez, C and Delgado, MDM and Sergio, F and Ferrer, M	Bubo bubo	Eagle owl	-0.752653	0.340482	correlational	plumage throat patch	brightness	Body Condition	body size	wing chord length	1	1	0.725005	0.316228	0.266108	0.27735
PAIRED	WOS:000222501500006	2004	2004	Krebs, EA and Hunte, W and Green, DJ	Bubulcus ibis	Cattle egret	0.921463	0.128491	correlational	plumage breeding plumes	elaboration	Fitness	reproductive success	breeding success (number of chicks fledged from pairs that laid eggs)	1	1	-0.185587	0.132453	0.118878	0.132453
PAIRED	WOS:000222501500006	2004	2004	Krebs, EA and Hunte, W and Green, DJ	Bubulcus ibis	Cattle egret	0.921463	0.128491	correlational	plumage breeding plumes	elaboration	Fitness	reproductive success	extra-pair copulation success	1	1	0.220788	0.124035	0.00654649	0.223607
PAIRED	WOS:000222501500006	2004	2004	Krebs, EA and Hunte, W and Green, DJ	Bubulcus ibis	Cattle egret	0.921463	0.128491	correlational	plumage breeding plumes	elaboration	Fitness	reproductive success	intra-pair copulation rate	1	1	0.353965	0.144338	0.600526	0.144338
PAIRED	WOS:000222501500006	2004	2004	Krebs, EA and Hunte, W and Green, DJ	Bubulcus ibis	Cattle egret	0.921463	0.128491	correlational	plumage breeding plumes	elaboration	Fitness	reproductive success	fledging success	1	1	-0.247305	0.128037	0.175897	0.128037
PAIRED	WOS:000305396400004	2012	2012	Kelly, Ryan J. and Murphy, Troy G. and Tarvin, Keith A. and Burness, Gary	Spinus tristis	American goldfinch	1.51835	0.30618	correlational	plumage throat	luminence	Body Condition	immunity	immunoglobulins	1	1	0.478199	0.242536	0.0737735	0.223607
PAIRED	WOS:000305396400004	2012	2012	Kelly, Ryan J. and Murphy, Troy G. and Tarvin, Keith A. and Burness, Gary	Spinus tristis	American goldfinch	1.90517	0.325258	correlational	plumage throat	hue	Body Condition	immunity	natural antibodies	1	1	0.507506	0.258199	-0.231657	0.258199
PAIRED	WOS:000259245900015	2008	2008	Silva, Nadia and Aviles, Jesus M. and Danchin, Etienne and Parejo, Deseada	Coracias garrulus	European roller	0.190609	0.283595	correlational	plumage back	brightness	Fitness	reproductive success	success of successful nests (number of fledglings in successful nests)	1	1	0.357619	0.174078	0.396769	0.185695
PAIRED	WOS:000221556500002	2004	2004	Kraaijeveld, K and Gregurke, J and Hall, C and Komdeur, J and Mulder, RA	Cygnus atratus	Black swan	0.177979	0.16363	correlational	plumage wing curled feathers	number	Body Condition	body size	tarsus length	1	1	-0.0701147	0.113961	0.0801713	0.125
PAIRED	WOS:000221556500002	2004	2004	Kraaijeveld, K and Gregurke, J and Hall, C and Komdeur, J and Mulder, RA	Cygnus atratus	Black swan	0.177979	0.16363	correlational	plumage wing curled feathers	number	Body Condition	body condition	mass corrected by size (residuals)	1	1	-0.0902442	0.113961	0.365444	0.125
PAIRED	WOS:000336484600010	2014	2014	Grunst, Andrea S. and Rotenberry, John T. and Grunst, Melissa L.	Setophaga petechia	Yellow warbler	4.9208	0.397421	correlational	plumage breast	melanin coverage	Body Condition	body condition	feather quality or condition (for all birds)	1	1	0.096992	0.119523	0.361418	0.09245
PAIRED	WOS:000336484600010	2014	2014	Grunst, Andrea S. and Rotenberry, John T. and Grunst, Melissa L.	Setophaga petechia	Yellow warbler	4.45069	0.498444	correlational	plumage breast	carotenoid saturation	Body Condition	body condition	feather quality or condition (for SY birds)	1	1	-0.586799	0.218218	0.742469	0.174078
PAIRED	WOS:000336484600010	2014	2014	Grunst, Andrea S. and Rotenberry, John T. and Grunst, Melissa L.	Setophaga petechia	Yellow warbler	3.40601	0.269451	correlational	plumage breast	carotenoid saturation	Body Condition	body condition	feather quality or condition (for ASY birds)	1	1	0.156751	0.150756	0.140516	0.111803
PAIRED	WOS:000336484600010	2014	2014	Grunst, Andrea S. and Rotenberry, John T. and Grunst, Melissa L.	Setophaga petechia	Yellow warbler	3.40601	0.269451	correlational	plumage breast	carotenoid saturation	Body Condition	body condition	feather quality or condition (for ASY birds)	1	1	0.538586	0.196116	-0.00375789	0.149071
PAIRED	WOS:000336484600010	2014	2014	Grunst, Andrea S. and Rotenberry, John T. and Grunst, Melissa L.	Setophaga petechia	Yellow warbler	4.45069	0.498444	correlational	plumage breast	carotenoid saturation	Body Condition	body condition	feather quality or condition (for SY birds)	1	1	-0.0277315	0.27735	0.85145	0.223607
PAIRED	WOS:000430212700008	2018	2018	Funghi, Caterina and Trigo, Sandra and Gomes, Ana Cristina R. and Soares, Marta C. and Cardoso, Goncalo C.	Estrilda astrild	Common waxbill	0.604386	0.140465	experimental	bill colour	saturation	Body Condition	stress	ACTH injection	1	1	-0.3399	0.57735	0.437801	1
PAIRED	WOS:000266864000002	2009	2009	McGraw, Kevin J. and Massaro, Melanie and Rivers, Trevor J. and Mattern, Thomas	Eudyptes robustus	Snares penguin	-0.420763	0.283245	correlational	plumage crest	hue	Body Condition	body condition	mass corrected by size (residuals)	1	1	0.337916	0.179605	0.679495	0.25
PAIRED	WOS:000266864000002	2009	2009	McGraw, Kevin J. and Massaro, Melanie and Rivers, Trevor J. and Mattern, Thomas	Eudyptes robustus	Snares penguin	-0.400841	0.282961	correlational	plumage crest	pigment concentration	Body Condition	body condition	mass corrected by size (residuals)	1	1	1.28074	0.179605	0.746218	0.25
PAIRED	WOS:000244750600008	2007	2007	Murphy, Troy G.	Eumomota superciliosa	Turquoise browed motmot	0.794646	0.130352	correlational	plumage tail (wire)	length	Fitness	reproductive success	number of fledglings	1	1	-0.281459	0.150756	0.383845	0.132453
PAIRED	WOS:000305182200017	2012	2012	Murphy, Troy G. and Pham, Tiffany T.	Eumomota superciliosa	Turquoise browed motmot	0.477842	0.18365	correlational	plumage tail	brightness	Body Condition	body condition	feather growth	1	1	-0.038644	0.142857	0.399937	0.131306
PAIRED	WOS:000348992900012	2015	2015	Vergara, P. and Fargallo, J. A. and Martinez-Padilla, J.	Falco tinnunculus	Common kestrel	1.22252	0.153305	correlational	skin eye ring	chroma	Fitness	reproductive success	clutch size	1	1	0.236936	0.0985329	0.142099	0.110432
PAIRED	WOS:000348992900012	2015	2015	Vergara, P. and Fargallo, J. A. and Martinez-Padilla, J.	Falco tinnunculus	Common kestrel	0.05	0.140745	correlational	skin eye ring	hue	Fitness	reproductive success	clutch size	-1	-1	-0.340585	0.117041	-0.0650918	0.119523
PAIRED	WOS:000348992900012	2015	2015	Vergara, P. and Fargallo, J. A. and Martinez-Padilla, J.	Falco tinnunculus	Common kestrel	0.152604	0.140928	correlational	skin eye ring	brightness	Fitness	reproductive success	clutch size	1	1	0.0969022	0.101535	-0.0163214	0.1066
PAIRED	WOS:000348992900012	2015	2015	Vergara, P. and Fargallo, J. A. and Martinez-Padilla, J.	Falco tinnunculus	Common kestrel	1.22252	0.153305	correlational	skin eye ring	chroma	Fitness	reproductive success	number of nestlings	1	1	0.261395	0.0932505	-0.0659826	0.111803
PAIRED	WOS:000348992900012	2015	2015	Vergara, P. and Fargallo, J. A. and Martinez-Padilla, J.	Falco tinnunculus	Common kestrel	0.05	0.140745	correlational	skin eye ring	hue	Fitness	reproductive success	number of nestlings	-1	-1	-0.260753	0.102598	-0.0574632	0.111803
PAIRED	WOS:000348992900012	2015	2015	Vergara, P. and Fargallo, J. A. and Martinez-Padilla, J.	Falco tinnunculus	Common kestrel	0.152604	0.140928	correlational	skin eye ring	brightness	Fitness	reproductive success	number of nestlings	1	1	0.0138009	0.0920575	-0.109091	0.119523
PAIRED	WOS:000371069800030	2016	2016	Lopez-Idiaquez, David and Vergara, Pablo and Antonio Fargallo, Juan and Martinez-Padilla, Jesus	Falco tinnunculus	Common kestrel	-1.72888	0.148252	correlational	plumage dorsal spots	size	Fitness	timing of breeding	laying date	-1	-1	-0.304839	0.0873704	-0.243959	0.0845154
PAIRED	WOS:000287753000008	2011	2011	Parejo, Deseada and Silva, Nadia and Danchin, Etienne and Aviles, Jesus M.	Falco tinnunculus	Common kestrel			correlational	plumage rump	brightness and UV chroma (for females is inverse since the ornament is black, for males is grey)	Body Condition	immunity	natural antibodies	-1	1	-0.334672	0.145865	0.420601	0.185695
PAIRED	WOS:000412182400019	2017	2017	Laczi, Miklos and Kotel, Dora and Torok, Janos and Hegyi, Gergely	Ficedula albicollis	Collared flycatcher	2.67203	0.486834	experimental	plumage wing patch	size	Fitness	offspring quality or condition	nestling body mass	1	1	0.341258	0.288675	-0.282265	0.288675
PAIRED	WOS:000412182400019	2017	2017	Laczi, Miklos and Kotel, Dora and Torok, Janos and Hegyi, Gergely	Ficedula albicollis	Collared flycatcher	2.92153	0.543087	experimental	plumage composite	brightness	Fitness	offspring quality or condition	nestling body mass	1	1	-0.350704	0.301511	0.0536213	0.288675
PAIRED	WOS:000412182400019	2017	2017	Laczi, Miklos and Kotel, Dora and Torok, Janos and Hegyi, Gergely	Ficedula albicollis	Collared flycatcher	2.51044	0.515476	experimental	plumage composite	UV chroma	Fitness	offspring quality or condition	nestling body mass	1	1	-0.033012	0.301511	0.0510142	0.288675
PAIRED	WOS:000412182400019	2017	2017	Laczi, Miklos and Kotel, Dora and Torok, Janos and Hegyi, Gergely	Ficedula albicollis	Collared flycatcher	2.67203	0.486834	experimental	plumage wing patch	size	Fitness	offspring quality or condition	nestling tarsus length	1	1	-0.079165	0.288675	0.455122	0.288675
PAIRED	WOS:000412182400019	2017	2017	Laczi, Miklos and Kotel, Dora and Torok, Janos and Hegyi, Gergely	Ficedula albicollis	Collared flycatcher	2.92153	0.543087	experimental	plumage composite	brightness	Fitness	offspring quality or condition	nestling tarsus length	1	1	-0.160361	0.301511	0.0942783	0.288675
PAIRED	WOS:000412182400019	2017	2017	Laczi, Miklos and Kotel, Dora and Torok, Janos and Hegyi, Gergely	Ficedula albicollis	Collared flycatcher	2.51044	0.515476	experimental	plumage composite	UV chroma	Fitness	offspring quality or condition	nestling tarsus length	1	1	-0.263643	0.301511	-0.380682	0.288675
PAIRED	WOS:000412182400019	2017	2017	Laczi, Miklos and Kotel, Dora and Torok, Janos and Hegyi, Gergely	Ficedula albicollis	Collared flycatcher	2.67203	0.486834	experimental	plumage wing patch	size	Fitness	parental quality	feeding rate	1	1	-0.19649	0.27735	-0.139192	0.27735
PAIRED	WOS:000412182400019	2017	2017	Laczi, Miklos and Kotel, Dora and Torok, Janos and Hegyi, Gergely	Ficedula albicollis	Collared flycatcher	2.92153	0.543087	experimental	plumage composite	brightness	Fitness	parental quality	feeding rate	1	1	0.221555	0.288675	0.252748	0.27735
PAIRED	WOS:000412182400019	2017	2017	Laczi, Miklos and Kotel, Dora and Torok, Janos and Hegyi, Gergely	Ficedula albicollis	Collared flycatcher	2.51044	0.515476	experimental	plumage composite	UV chroma	Fitness	parental quality	feeding rate	1	1	0.122408	0.288675	0.0639872	0.27735
PAIRED	WOS:000412182400019	2017	2017	Laczi, Miklos and Kotel, Dora and Torok, Janos and Hegyi, Gergely	Ficedula albicollis	Collared flycatcher	2.67203	0.486834	correlational	plumage patch	size	Fitness	reproductive success	number of fledglings	1	1	-0.459897	0.160128	0.298566	0.160128
PAIRED	WOS:000412182400019	2017	2017	Laczi, Miklos and Kotel, Dora and Torok, Janos and Hegyi, Gergely	Ficedula albicollis	Collared flycatcher	2.92153	0.543087	experimental	plumage composite	brightness	Fitness	reproductive success	number of fledglings	1	1	-0.0983156	0.301511	-0.020903	0.288675
PAIRED	WOS:000412182400019	2017	2017	Laczi, Miklos and Kotel, Dora and Torok, Janos and Hegyi, Gergely	Ficedula albicollis	Collared flycatcher	2.51044	0.515476	experimental	plumage composite	UV chroma	Fitness	reproductive success	number of fledglings	1	1	-0.190056	0.301511	-0.27654	0.288675
PAIRED	WOS:000328127700009	2013	2013	Laczi, Miklos and Hegyi, Gergely and Herenyi, Marton and Kiss, Dorottya and Marko, Gabor and Nagy, Gergely and Rosivall, Balazs and Szoellosi, Eszter and Toeroek, Janos	Ficedula albicollis	Collared flycatcher	2.92153	0.543087	correlational	plumage composite (forehead, crown and breast in both sexes, plus wing patch only in males)	brightness	Fitness	timing of breeding	laying date	1	-1	0.202733	0.100504	-0.244774	0.113961
PAIRED	WOS:000313650600002	2013	2013	Kiss, Dorottya and Hegyi, Gergely and Torok, Janos and Rosivall, Balazs	Ficedula albicollis	Collared flycatcher	2.67203	0.486834	correlational	plumage wing patch	size	Fitness	parental quality	feeding rate	1	1	0.302428	0.213201	0.142536	0.213201
PAIRED	WOS:000461820800005	2019	2019	Moreno, Juan and Cantarero, Alejandro and Plaza, Mireia and Lopez-Arrabe, Jimena	Ficedula hypoleuca	Pied flycatcher	3.82907	0.187009	correlational	plumage wing patch	size	Fitness	reproductive success	breeding success (proportion of eggs laid that resulted in fledged young)	1	1	0.00280449	0.096225	0.0220845	0.118678
PAIRED	WOS:000461820800005	2019	2019	Moreno, Juan and Cantarero, Alejandro and Plaza, Mireia and Lopez-Arrabe, Jimena	Ficedula hypoleuca	Pied flycatcher	2.14144	0.134281	correlational	plumage forehead patch	size	Fitness	reproductive success	breeding success (proportion of eggs laid that resulted in fledged young)	1	1	0.276082	0.096225	-0.0413773	0.118678
PAIRED	WOS:000461820800005	2019	2019	Moreno, Juan and Cantarero, Alejandro and Plaza, Mireia and Lopez-Arrabe, Jimena	Ficedula hypoleuca	Pied flycatcher	3.82907	0.187009	correlational	plumage wing patch	size	Fitness	reproductive success	Clutch size	1	1	0.141347	0.096225	-0.131217	0.118678
PAIRED	WOS:000461820800005	2019	2019	Moreno, Juan and Cantarero, Alejandro and Plaza, Mireia and Lopez-Arrabe, Jimena	Ficedula hypoleuca	Pied flycatcher	2.14144	0.134281	correlational	plumage forehead patch	size	Fitness	reproductive success	Clutch size	1	1	-0.167284	0.096225	-0.239181	0.118678
PAIRED	WOS:000298983700013	2012	2012	Ruiz-De-Castaneda, Rafael and Burtt, Edward H., Jr. and Gonzalez-Braojos, Sonia and Moreno, Juan	Ficedula hypoleuca	Pied flycatcher	0.995798	0.18966	correlational	plumage wing patch (feather)	presence (expression itself)	Body Condition	body condition	bacterial degradability	-1	-1	-0.263184	0.0898027	-0.705121	0.102062
PAIRED	WOS:000461820800005	2019	2019	Moreno, Juan and Cantarero, Alejandro and Plaza, Mireia and Lopez-Arrabe, Jimena	Ficedula hypoleuca	Pied flycatcher	3.82907	0.187009	correlational	plumage wing patch	size	Body Condition	environment	climatic conditions	-1	-1	-0.238744	0.096225	0.245446	0.118678
PAIRED	WOS:000461820800005	2019	2019	Moreno, Juan and Cantarero, Alejandro and Plaza, Mireia and Lopez-Arrabe, Jimena	Ficedula hypoleuca	Pied flycatcher	3.82907	0.187009	correlational	plumage wing patch	size	Body Condition	environment	climatic conditions	1	1	0.280155	0.096225	0.206309	0.118678
PAIRED	WOS:000461820800005	2019	2019	Moreno, Juan and Cantarero, Alejandro and Plaza, Mireia and Lopez-Arrabe, Jimena	Ficedula hypoleuca	Pied flycatcher	2.14144	0.134281	correlational	plumage forehead patch	size	Body Condition	environment	climatic conditions	-1	-1	-0.24002	0.096225	0.0992858	0.118678
PAIRED	WOS:000461820800005	2019	2019	Moreno, Juan and Cantarero, Alejandro and Plaza, Mireia and Lopez-Arrabe, Jimena	Ficedula hypoleuca	Pied flycatcher	2.14144	0.134281	correlational	plumage forehead patch	size	Body Condition	environment	climatic conditions	1	1	0.104919	0.096225	0.283172	0.118678
PAIRED	WOS:000325005900005	2013	2013	Doutrelant, C; Gregoire, A; Gomez, D; Staszewski, V; Arnoux, E; Tveraa, T; Faivre, B; Boulinier, T	Fratercula arctica	Atlantic puffin	0.430383	0.347565	correlational	cutaneous gape rosette	colour intensity	Body Condition	body condition	mass corrected by size (residuals)	1	1	0.733169	0.267261	-0.3341	0.258199
PAIRED	WOS:000378757700006	2016	2016	Enrique Martinez, Jose and Francisco Calvo, Jose and Victoria Jimenez-Franco, Maria and Zuberogoitia, Inigo and Lopez-Lopez, Pascual	Aquila pennata	Booted eagle	-0.461778	0.0714685	correlational	plumage ventral	darkness	Fitness	reproductive success	number of fledglings	1	1	0.050987	0.05	-0.0109588	0.05
PAIRED	WOS:000437001800006	2018	2018	Liu, Yu and Scordato, Elizabeth S. C. and Safran, Rebecca and Evans, Matthew	Hirundo rustica	Barn swallow	2.76579	0.219108	correlational	plumage tail streamer	length	Fitness	reproductive success	number of eggs	1	1	0.238596	0.140028	0.0503294	0.140028
PAIRED	WOS:000437001800006	2018	2018	Liu, Yu and Scordato, Elizabeth S. C. and Safran, Rebecca and Evans, Matthew	Hirundo rustica	Barn swallow	0.203088	0.157061	correlational	plumage throat	colour	Fitness	reproductive success	number of eggs	1	1	0.177337	0.140028	0.101886	0.140028
PAIRED	WOS:000437001800006	2018	2018	Liu, Yu and Scordato, Elizabeth S. C. and Safran, Rebecca and Evans, Matthew	Hirundo rustica	Barn swallow	0.214706	0.157109	correlational	plumage belly	colour	Fitness	reproductive success	number of eggs	1	1	-0.167952	0.140028	0.289863	0.140028
PAIRED	WOS:000437001800006	2018	2018	Liu, Yu and Scordato, Elizabeth S. C. and Safran, Rebecca and Evans, Matthew	Hirundo rustica	Barn swallow	2.76579	0.219108	correlational	plumage tail streamer	length	Fitness	reproductive success	number of fledglings	1	1	0.407943	0.138675	0.107664	0.138675
PAIRED	WOS:000437001800006	2018	2018	Liu, Yu and Scordato, Elizabeth S. C. and Safran, Rebecca and Evans, Matthew	Hirundo rustica	Barn swallow	0.203088	0.157061	correlational	plumage throat	colour	Fitness	reproductive success	number of fledglings	1	1	0.0714045	0.138675	0.157116	0.138675
PAIRED	WOS:000437001800006	2018	2018	Liu, Yu and Scordato, Elizabeth S. C. and Safran, Rebecca and Evans, Matthew	Hirundo rustica	Barn swallow	0.214706	0.157109	correlational	plumage belly	colour	Fitness	reproductive success	number of fledglings	1	1	-0.177062	0.138675	0.154451	0.138675
PAIRED	WOS:000437001800006	2018	2018	Liu, Yu and Scordato, Elizabeth S. C. and Safran, Rebecca and Evans, Matthew	Hirundo rustica	Barn swallow	2.76579	0.219108	correlational	plumage tail streamer	length	Fitness	timing of breeding	hatching date	-1	-1	-0.307867	0.123091	-0.135196	0.123091
PAIRED	WOS:000437001800006	2018	2018	Liu, Yu and Scordato, Elizabeth S. C. and Safran, Rebecca and Evans, Matthew	Hirundo rustica	Barn swallow	0.203088	0.157061	correlational	plumage throat	colour	Fitness	timing of breeding	hatching date	-1	-1	0.0073301	0.123091	-0.363347	0.123091
PAIRED	WOS:000437001800006	2018	2018	Liu, Yu and Scordato, Elizabeth S. C. and Safran, Rebecca and Evans, Matthew	Hirundo rustica	Barn swallow	0.214706	0.157109	correlational	plumage belly	colour	Fitness	timing of breeding	hatching date	-1	-1	0.153332	0.123091	0.0987964	0.123091
PAIRED	WOS:000221556500012	2004	2004	Safran, RJ and McGraw, KJ	Hirundo rustica	Barn swallow	2.08815	0.240351	correlational	plumage tail	length	Fitness	timing of breeding	laying date	-1	-1	-0.210885	0.149071	-0.0191623	0.19245
PAIRED	WOS:000296295000036	2011	2011	Vortman, Yoni and Lotem, Arnon and Dor, Roi and Lovette, Irby J. and Safran, Rebecca J.	Hirundo rustica	Barn swallow	1.94467	0.173814	correlational	plumage tail streamer	length	Fitness	reproductive success	number of nestlings	1	1	0.470244	0.2	0.128743	0.188982
PAIRED	WOS:000296295000036	2011	2011	Vortman, Yoni and Lotem, Arnon and Dor, Roi and Lovette, Irby J. and Safran, Rebecca J.	Hirundo rustica	Barn swallow	1.94467	0.173814	correlational	plumage tail streamer	length	Fitness	reproductive success	number of nestlings	1	1	0.615502	0.288675	0.810743	0.316228
PAIRED	WOS:000296295000036	2011	2011	Vortman, Yoni and Lotem, Arnon and Dor, Roi and Lovette, Irby J. and Safran, Rebecca J.	Hirundo rustica	Barn swallow	0.39106	0.150494	correlational	plumage ventral	colour	Fitness	reproductive success	number of nestlings	1	1	-0.152165	0.2	0.477884	0.188982
PAIRED	WOS:000296295000036	2011	2011	Vortman, Yoni and Lotem, Arnon and Dor, Roi and Lovette, Irby J. and Safran, Rebecca J.	Hirundo rustica	Barn swallow	0.39106	0.150494	correlational	plumage ventral	colour	Fitness	reproductive success	number of nestlings	1	1	0.381212	0.288675	0.887184	0.333333
PAIRED	WOS:000318840100069	2013	2013	Saino, Nicola and Romano, Maria and Rubolini, Diego and Ambrosini, Roberto and Caprioli, Manuela and Milzani, Aldo and Costanzo, Alessandra and Colombo, Graziano and Canova, Luca and Wakamatsu, Kazumasa	Hirundo rustica	Barn swallow	-0.192139	0.21746	correlational	plumage belly	hue	Fitness	survival	survival	1	1	0.0396807	0.125988	0.293522	0.09759
PAIRED	WOS:000318840100069	2013	2013	Saino, Nicola and Romano, Maria and Rubolini, Diego and Ambrosini, Roberto and Caprioli, Manuela and Milzani, Aldo and Costanzo, Alessandra and Colombo, Graziano and Canova, Luca and Wakamatsu, Kazumasa	Hirundo rustica	Barn swallow	0.482213	0.220091	correlational	plumage belly	UV hue	Fitness	survival	survival	1	1	0.244389	0.125988	0.077262	0.09759
PAIRED	WOS:000318840100069	2013	2013	Saino, Nicola and Romano, Maria and Rubolini, Diego and Ambrosini, Roberto and Caprioli, Manuela and Milzani, Aldo and Costanzo, Alessandra and Colombo, Graziano and Canova, Luca and Wakamatsu, Kazumasa	Hirundo rustica	Barn swallow	0.197268	0.217487	correlational	plumage belly	chroma	Fitness	survival	survival	1	1	-0.0805355	0.125988	-0.258142	0.09759
PAIRED	WOS:000229428400005	2005	2005	Mougeot, F and Redpath, SM and Leckie, F	Lagopus lagopus	Red grouse	-1.01003	0.182788	correlational	comb	UV brightness	Body Condition	parasites	parasite abundance	-1	-1	-0.483071	0.133631	-0.438792	0.116248
PAIRED	WOS:000311404100005	2012	2012	Vergara, Pablo and Redpath, Stephen M. and Martinez-Padilla, Jesus and Mougeot, Francois	Lagopus lagopus	Red grouse	11.127	1.1372	correlational	comb	size	Body Condition	environment	climatic conditions	-1	-1	-0.71343	0.0449921	-0.97546	0.0324614
PAIRED	WOS:000311404100005	2012	2012	Vergara, Pablo and Redpath, Stephen M. and Martinez-Padilla, Jesus and Mougeot, Francois	Lagopus lagopus	Red grouse	11.127	1.1372	correlational	comb	size	Body Condition	parasites	parasite infection	-1	-1	0.00857482	0.0449921	-0.805916	0.0324614
PAIRED	WOS:000173591800004	2001	2001	Velando, A and Lessells, CM and Marquez, JC	Larosterna inca	Inca tern	0.092	0.200126	correlational	plumage moustache	length	Fitness	offspring quality or condition	mean chick body mass	1	1	0.632833	0.235702	0.725005	0.333333
PAIRED	WOS:000173591800004	2001	2001	Velando, A and Lessells, CM and Marquez, JC	Larosterna inca	Inca tern	0.092	0.200126	correlational	plumage moustache	length	Fitness	offspring quality or condition	mean chick wing web index	1	1	0.590145	0.235702	0.459897	0.258199
PAIRED	WOS:000173591800004	2001	2001	Velando, A and Lessells, CM and Marquez, JC	Larosterna inca	Inca tern	0.092	0.200126	correlational	plumage moustache	length	Fitness	reproductive success	reproductive success (number of offspring fledged)	1	1	0.528782	0.267261	0.290442	0.223607
PAIRED	WOS:000173591800004	2001	2001	Velando, A and Lessells, CM and Marquez, JC	Larosterna inca	Inca tern	0.092	0.200126	correlational	plumage moustache	length	Body Condition	body size	body mass	1	1	0.53606	0.132453	0.388423	0.160128
PAIRED	WOS:000173591800004	2001	2001	Velando, A and Lessells, CM and Marquez, JC	Larosterna inca	Inca tern	0.092	0.200126	correlational	plumage moustache	length	Body Condition	body condition	mass corrected by size (residuals)	1	1	0.423649	0.132453	0.342828	0.160128
PAIRED	WOS:000173591800004	2001	2001	Velando, A and Lessells, CM and Marquez, JC	Larosterna inca	Inca tern	-0.166	0.200364	correlational	plumage moustache	asymmetry	Body Condition	body condition	mass corrected by size (residuals)	-1	-1	-0.100335	0.132453	-0.202733	0.160128
PAIRED	WOS:000173591800004	2001	2001	Velando, A and Lessells, CM and Marquez, JC	Larosterna inca	Inca tern	0.520818	0.201378	correlational	wattle (skin)	length	Body Condition	body condition	mass corrected by size (residuals)	1	1	0.234189	0.131306	0.298566	0.160128
PAIRED	WOS:000173591800004	2001	2001	Velando, A and Lessells, CM and Marquez, JC	Larosterna inca	Inca tern	0.228859	0.201685	correlational	wattle (skin)	colour	Body Condition	body condition	mass corrected by size (residuals)	1	1	0.331647	0.131306	0.0500417	0.160128
PAIRED	WOS:000440036000012	2018	2018	Pardal, Sara and Alves, Jose A. and Mota, Paulo G. and Ramos, Jaime A.	Limosa limosa	Black tailed godwit	0.6563	0.249501	correlational	plumage composite (ventral)	colour extent (pheomelanin) in both sexes plus bar extent (melanin) in females	Body Condition	immunity	innate immunity	-1	-1	0.287682	0.162221	-0.237359	0.2
PAIRED	WOS:000186778400008	2003	2003	Massaro, M and Davis, LS and Darby, JT	Megadyptes antipodes	Yelloweyed penguin	-0.48756	0.210473	correlational	eye colour	saturation	Fitness	reproductive success	mean annual breeding success (number of chicks fledged)	1	1	0.423805	0.160128	0.491392	0.174078
PAIRED	WOS:000186778400008	2003	2003	Massaro, M and Davis, LS and Darby, JT	Megadyptes antipodes	Yelloweyed penguin	-0.701616	0.2137	correlational	plumage postocular stripe	saturation	Fitness	reproductive success	mean annual breeding success (number of chicks fledged)	1	1	0.592258	0.160128	0.271022	0.5
PAIRED	WOS:000186778400008	2003	2003	Massaro, M and Davis, LS and Darby, JT	Megadyptes antipodes	Yelloweyed penguin	0.498779	0.210614	correlational	eye colour	hue	Fitness	reproductive success	mean annual breeding success (number of chicks fledged)	-1	-1	-0.39237	0.408248	0.268983	0.447214
PAIRED	WOS:000186778400008	2003	2003	Massaro, M and Davis, LS and Darby, JT	Megadyptes antipodes	Yelloweyed penguin	0.201723	0.207941	correlational	plumage postocular stripe	hue	Fitness	reproductive success	mean annual breeding success (number of chicks fledged)	1	1	-0.351903	0.408248	-0.398931	0.447214
PAIRED	WOS:000347703700008	2015	2015	Surmacki, Adrian and Stepniewski, Janusz and Stepniewska, Malgorzata	Panurus biarmicus	Bearded reedling	0.825837	0.278508	correlational	plumage back patch	length	Body Condition	body condition	mass corrected by size (mass divided by size)	1	1	-0.163274	0.204124	0.402822	0.2
PAIRED	WOS:000347703700008	2015	2015	Surmacki, Adrian and Stepniewski, Janusz and Stepniewska, Malgorzata	Panurus biarmicus	Bearded reedling	1.28802	0.255513	correlational	tail	length	Body Condition	body condition	mass corrected by size	1	1	0.495477	0.204124	-0.0588009	0.2
PAIRED	WOS:000347703700008	2015	2015	Surmacki, Adrian and Stepniewski, Janusz and Stepniewska, Malgorzata	Panurus biarmicus	Bearded reedling	2.74066	0.353772	correlational	bill colour	chroma	Body Condition	body condition	mass corrected by size	1	1	0.521973	0.204124	-0.0685869	0.2
PAIRED	WOS:000347703700008	2015	2015	Surmacki, Adrian and Stepniewski, Janusz and Stepniewska, Malgorzata	Panurus biarmicus	Bearded reedling	1.83093	0.305124	correlational	lore	area	Body Condition	body condition	mass corrected by size	1	1	0.0898789	0.204124	0.179462	0.2
PAIRED	WOS:000312990100003	2013	2013	Limbourg, Tobias and Mateman, A. Christa and Lessells, C. M.	Cyanistes caeruleus	Blue tit	1.56447	0.292713	correlational	plumage crown	UV chroma	Fitness	offspring quality or condition	fledgling tarsus length	1	1	-0.0347035	0.185695	0.441791	0.185695
PAIRED	WOS:000312990100003	2013	2013	Limbourg, Tobias and Mateman, A. Christa and Lessells, C. M.	Cyanistes caeruleus	Blue tit	1.56447	0.292713	correlational	plumage crown	UV chroma	Fitness	reproductive success	brood size (chicks)	1	1	0.175789	0.185695	-0.295294	0.182574
PAIRED	WOS:000312990100003	2013	2013	Limbourg, Tobias and Mateman, A. Christa and Lessells, C. M.	Cyanistes caeruleus	Blue tit	1.56447	0.292713	correlational	plumage crown	UV chroma	Fitness	timing of breeding	hatching date	-1	-1	-0.332762	0.185695	-0.0350143	0.182574
PAIRED	WOS:000241344600012	2006	2006	Hidalgo-Garcia, Sergio	Cyanistes caeruleus	Blue tit	0.442217	0.24923	correlational	plumage breast	brightness	Fitness	offspring quality or condition	nestling immune response	1	1	0.583913	0.208514	0.571246	0.208514
PAIRED	WOS:000241344600012	2006	2006	Hidalgo-Garcia, Sergio	Cyanistes caeruleus	Blue tit	0.989468	0.260871	correlational	plumage breast	hue	Fitness	offspring quality or condition	nestling immune response	-1	-1	-0.601561	0.208514	-1.09995	0.208514
PAIRED	WOS:000376646700019	2016	2016	Lucass, Carsten and Iserbyt, Arne and Eens, Marcel and Mueller, Wendt	Cyanistes caeruleus	Blue tit	0.0235478	0.216968	correlational	plumage crown	UV chroma	Fitness	parental quality	feeding rate	1	1	0.0962966	0.141421	-0.063686	0.169031
PAIRED	WOS:000376646700019	2016	2016	Lucass, Carsten and Iserbyt, Arne and Eens, Marcel and Mueller, Wendt	Cyanistes caeruleus	Blue tit	0.038455	0.215714	correlational	plumage breast	chroma	Fitness	parental quality	feeding rate	1	1	0.164364	0.142857	0.082839	0.171499
PAIRED	WOS:000238486700008	2006	2006	Delhey, K and Kempenaers, B	Cyanistes caeruleus	Blue tit	0.625501	0.214748	correlational	plumage crown	hue	Fitness	survival	survival	-1	-1	0.0868891	0.078326	-0.0792551	0.0800641
PAIRED	WOS:000238486700008	2006	2006	Delhey, K and Kempenaers, B	Cyanistes caeruleus	Blue tit	2.82101	0.296146	correlational	plumage crown	UV chroma	Fitness	survival	survival	1	1	-0.0627279	0.078326	0.0306174	0.0800641
PAIRED	WOS:000238486700008	2006	2006	Delhey, K and Kempenaers, B	Cyanistes caeruleus	Blue tit	2.56368	0.282998	correlational	plumage crown	chroma	Fitness	survival	survival	1	1	-0.0627041	0.078326	-0.0523169	0.0800641
PAIRED	WOS:000238486700008	2006	2006	Delhey, K and Kempenaers, B	Cyanistes caeruleus	Blue tit	0.933274	0.220802	correlational	plumage crown	brightness	Fitness	survival	survival	1	1	-0.31439	0.078326	-0.0827614	0.0800641
PAIRED	WOS:000297849300010	2012	2012	Doutrelant, Claire and Gregoire, Arnaud and Midamegbe, Afiwa and Lambrechts, Marcel and Perret, Philippe	Cyanistes caeruleus	Blue tit	0.231534	0.209236	experimental	plumage cap	UV-blue hue	Body Condition	stress	simulation of predation stress by whole clutch and nest material removal	-1	-1	-0.0214919	0.138675	-0.0950711	0.156174
PAIRED	WOS:000297849300010	2012	2012	Doutrelant, Claire and Gregoire, Arnaud and Midamegbe, Afiwa and Lambrechts, Marcel and Perret, Philippe	Cyanistes caeruleus	Blue tit	0.077313	0.208617	experimental	plumage breast	chroma	Body Condition	stress	simulation of predation stress by whole clutch and nest material removal	1	1	0.0247793	0.138675	0.0733136	0.156174
PAIRED	WOS:000233367300004	2005	2005	Mand, R and Tilgar, V and Moller, AP	Parus major	Great tit	0.83741	0.140629	correlational	plumage breast	hue	Fitness	reproductive success	number of fledglings	1	1	-0.253742	0.1	0.134741	0.0995037
PAIRED	WOS:000325754100001	2013	2013	Garcia-Navas, Vicente and Garcia del Rincon, Amanda and Ferrer, Esperanza S. and Fathi, Hicham	Petronia petronia	Rock sparrow	1.97319	0.302541	correlational	plumage breast patch	size	Fitness	parental quality	feeding rate	1	1	0.157462	0.2	0.023568	0.218218
PAIRED	WOS:000280088700006	2010	2010	Griggio, Matteo and Zanollo, Valeria and Hoi, Herbert	Petronia petronia	Rock sparrow	0.673166	0.290857	correlational	plumage breast patch	size	Fitness	parental quality	feeding rate	1	1	0.00400002	0.208514	0.522984	0.208514
PAIRED	WOS:000186338400010	2003	2003	Veit, AC and Jones, IL	Phaethon rubricauda	Redtailed Tropicbird	0.353103	0.10167	correlational	tail streamer	length	Fitness	offspring quality or condition	chick mass	1	1	0.30952	0.316228	0.693147	0.377964
PAIRED	WOS:000186338400010	2003	2003	Veit, AC and Jones, IL	Phaethon rubricauda	Redtailed Tropicbird	0.353103	0.10167	correlational	tail streamer	length	Body Condition	body condition	mass corrected by size (residuals)	1	1	0.0200027	0.152499	0.100335	0.188982
PAIRED	WOS:000179912500006	2003	2003	Daunt, F and Monaghan, P and Wanless, S and Harris, MP	Phalacrocorax aristotelis	European Shag	-0.212223	0.225686	correlational	plumage crest	size	Fitness	timing of breeding	laying date	-1	-1	-0.647523	0.213201	-0.693147	0.223607
PAIRED	WOS:000440084700001	2018	2018	Amat, Juan A. and Garrido, Araceli and Portavia, Francesca and Rendon-Martos, Manuel and Perez-Galvez, Antonio and Garrido-Fernandez, Juan and Gomez, Jesus and Bechet, Arnaud and Rendon, Miguel A.	Phoenicopterus roseus	Greater flamingo	-0.589217	0.0514282	correlational	plumage neck colouration	colour intensity	Body Condition	body condition	abdominal index	1	1	0.266108	0.109109	0.0100003	0.125
PAIRED	WOS:000174502800003	2002	2002	Blanco, G and De la Puente, J	Pica pica	Black billed magpie	0.945055	0.184248	correlational	tail	length	Body Condition	body condition	number of feathers with fault bars	-1	-1	-0.853359	0.301511	-0.576193	0.229416
PAIRED	WOS:000310738400002	2012	2012	Van Rooij, Erica P. and Griffith, Simon C.	Poephila acuticauda	Long tailed Finch	0.661648	0.145975	correlational	plumage tail	length	Fitness	reproductive success	number of fledglings	1	1	0.171667	0.136083	0.0500417	0.13484
PAIRED	WOS:000310738400002	2012	2012	Van Rooij, Erica P. and Griffith, Simon C.	Poephila acuticauda	Long tailed Finch	1.21155	0.230659	correlational	plumage throat patch	size	Fitness	reproductive success	number of fledglings	1	1	0.0100003	0.19245	0	0.182574
PAIRED	WOS:000310738400002	2012	2012	Van Rooij, Erica P. and Griffith, Simon C.	Poephila acuticauda	Long tailed Finch	0.460199	0.178416	correlational	bill	colour intensity	Fitness	reproductive success	number of fledglings	1	1	-0.0400214	0.185695	0.110447	0.188982
PAIRED	WOS:000248962200003	2007	2007	Balenger, Susan L. and Johnson, L. Scott and Brubaker, Jessica L. and Ostlind, Emilene	Sialia currucoides	Mountain bluebird	3.38473	0.206728	correlational	plumage rump	colour intensity	Fitness	offspring quality or condition	brood growth rate	1	1	-0.0200027	0.162221	0.0400214	0.150756
PAIRED	WOS:000248962200003	2007	2007	Balenger, Susan L. and Johnson, L. Scott and Brubaker, Jessica L. and Ostlind, Emilene	Sialia currucoides	Mountain bluebird	3.38473	0.206728	correlational	plumage rump	colour intensity	Fitness	parental quality	feeding rate	1	1	-0.0902442	0.137361	-0.120581	0.128037
PAIRED	WOS:000248962200003	2007	2007	Balenger, Susan L. and Johnson, L. Scott and Brubaker, Jessica L. and Ostlind, Emilene	Sialia currucoides	Mountain bluebird	3.38473	0.206728	correlational	plumage rump	colour intensity	Body Condition	body size	wing length	1	1	0.110447	0.0966736	0.244774	0.0928477
PAIRED	WOS:000248962200003	2007	2007	Balenger, Susan L. and Johnson, L. Scott and Brubaker, Jessica L. and Ostlind, Emilene	Sialia currucoides	Mountain bluebird	3.38473	0.206728	correlational	plumage rump	colour intensity	Body Condition	body size	body mass	1	1	0.140926	0.100504	0.0600722	0.0940721
PAIRED	WOS:000248962200003	2007	2007	Balenger, Susan L. and Johnson, L. Scott and Brubaker, Jessica L. and Ostlind, Emilene	Sialia currucoides	Mountain bluebird	3.38473	0.206728	correlational	plumage rump	colour intensity	Body Condition	body condition	mass corrected by size (residuals)	1	1	0.110447	0.101015	0.0100003	0.0971286
PAIRED	WOS:000340612600004	2014	2014	Morrison, Ashley and Flood, Nancy J. and Reudink, Matthew W.	Sialia currucoides	Mountain bluebird	1.49214	0.21433	correlational	plumage tail	colouration	Body Condition	body size	tail length	1	1	0.287682	0.133631	-0.140926	0.137361
PAIRED	WOS:000340612600004	2014	2014	Morrison, Ashley and Flood, Nancy J. and Reudink, Matthew W.	Sialia currucoides	Mountain bluebird	2.5841	0.267149	correlational	plumage rump	colouration	Body Condition	body size	tail length	1	1	0.161387	0.133631	-0.192337	0.137361
PAIRED	WOS:000340612600004	2014	2014	Morrison, Ashley and Flood, Nancy J. and Reudink, Matthew W.	Sialia currucoides	Mountain bluebird	1.49214	0.21433	correlational	plumage tail	colouration	Body Condition	body size	tarsus length	1	1	-0.0400214	0.133631	-0.030009	0.138675
PAIRED	WOS:000340612600004	2014	2014	Morrison, Ashley and Flood, Nancy J. and Reudink, Matthew W.	Sialia currucoides	Mountain bluebird	2.5841	0.267149	correlational	plumage rump	colouration	Body Condition	body size	tarsus length	1	1	0.100335	0.133631	-0.0100003	0.138675
PAIRED	WOS:000340612600004	2014	2014	Morrison, Ashley and Flood, Nancy J. and Reudink, Matthew W.	Sialia currucoides	Mountain bluebird	1.49214	0.21433	correlational	plumage tail	colouration	Body Condition	body size	wing chord length	1	1	0	0.132453	-0.0400214	0.137361
PAIRED	WOS:000340612600004	2014	2014	Morrison, Ashley and Flood, Nancy J. and Reudink, Matthew W.	Sialia currucoides	Mountain bluebird	2.5841	0.267149	correlational	plumage rump	colouration	Body Condition	body size	wing chord length	1	1	-0.0200027	0.132453	-0.0200027	0.137361
PAIRED	WOS:000340612600004	2014	2014	Morrison, Ashley and Flood, Nancy J. and Reudink, Matthew W.	Sialia currucoides	Mountain bluebird	1.49214	0.21433	correlational	plumage tail	colouration	Body Condition	body size	body mass	1	1	-0.0400214	0.19245	-0.0701147	0.19245
PAIRED	WOS:000340612600004	2014	2014	Morrison, Ashley and Flood, Nancy J. and Reudink, Matthew W.	Sialia currucoides	Mountain bluebird	2.5841	0.267149	correlational	plumage rump	colouration	Body Condition	body size	body mass	1	1	0.298566	0.19245	0.030009	0.19245
PAIRED	WOS:000231658900017 and male 8	2005-2003	2004	Siefferman, L, Hill, GE	Sialia sialis	Eastern bluebird	2.1115	0.592579	correlational	plumage tail and rump	color	Fitness	offspring quality or condition	offspring mass	1	1	0.15114	0.0863868	-0.100335	0.258199
PAIRED	WOS:000231658900017 and male 8	2005-2003	2004	Siefferman, L, Hill, GE	Sialia sialis	Eastern bluebird	2.1115	0.592579	correlational	plumage tail and rump	color	Fitness	timing of breeding	laying date	-1	-1	-0.160328	0.0678844	0.15114	0.223607
PAIRED	WOS:000308823100015	2012	2012	Palestis, Brian G. and Nisbet, Ian C. T. and Hatch, Jeremy J. and Arnold, Jennifer M. and Szczys, Patricia	Sterna dougallii	Roseate tern	0.75354	0.0759323	correlational	plumage tail	length	Fitness	timing of breeding	laying date	-1	-1	-0.255413	0.047036	-0.255413	0.0617802
PAIRED	WOS:000308823100015	2012	2012	Palestis, Brian G. and Nisbet, Ian C. T. and Hatch, Jeremy J. and Arnold, Jennifer M. and Szczys, Patricia	Sterna dougallii	Roseate tern	0.75354	0.0759323	correlational	plumage tail	length	Body Condition	body size	body size	1	1	0.298566	0.0482805	0.223656	0.0629941
PAIRED	WOS:000308823100015	2012	2012	Palestis, Brian G. and Nisbet, Ian C. T. and Hatch, Jeremy J. and Arnold, Jennifer M. and Szczys, Patricia	Sterna dougallii	Roseate tern	0.75354	0.0759323	correlational	plumage tail	length	Body Condition	body size	body mass	1	1	0.140926	0.0469841	0.0902442	0.0618984
PAIRED	WOS:000229856900018	2005	2005	Komdeur, J and Oorebeek, M and van Overveld, T and Cuthill, IC	Sturnus vulgaris	European starling	2.68937	0.488326	correlational	plumage throat	feather length	Fitness	reproductive success	clutch size	1	1	0.345799	0.152499	0.168481	0.2
PAIRED	WOS:000229856900018	2005	2005	Komdeur, J and Oorebeek, M and van Overveld, T and Cuthill, IC	Sturnus vulgaris	European starling	0.0325875	0.353912	correlational	plumage throat	chroma	Fitness	reproductive success	clutch size	1	1	0.0255432	0.152499	-0.0111391	0.2
PAIRED	WOS:000229856900018	2005	2005	Komdeur, J and Oorebeek, M and van Overveld, T and Cuthill, IC	Sturnus vulgaris	European starling	2.68937	0.488326	correlational	plumage throat	feather length	Fitness	reproductive success	fledging success	1	1	0.000466252	0.152499	-0.194573	0.208514
PAIRED	WOS:000229856900018	2005	2005	Komdeur, J and Oorebeek, M and van Overveld, T and Cuthill, IC	Sturnus vulgaris	European starling	0.0325875	0.353912	correlational	plumage throat	chroma	Fitness	reproductive success	fledging success	1	1	-0.373002	0.152499	-0.0680414	0.208514
PAIRED	WOS:000229856900018	2005	2005	Komdeur, J and Oorebeek, M and van Overveld, T and Cuthill, IC	Sturnus vulgaris	European starling	2.68937	0.488326	correlational	plumage throat	feather length	Fitness	reproductive success	hatching success	1	1	0.561445	0.152499	0.517749	0.208514
PAIRED	WOS:000229856900018	2005	2005	Komdeur, J and Oorebeek, M and van Overveld, T and Cuthill, IC	Sturnus vulgaris	European starling	0.0325875	0.353912	correlational	plumage throat	chroma	Fitness	reproductive success	hatching success	1	1	0.0255432	0.152499	0.284057	0.208514
PAIRED	WOS:000229856900018	2005	2005	Komdeur, J and Oorebeek, M and van Overveld, T and Cuthill, IC	Sturnus vulgaris	European starling	2.68937	0.488326	correlational	plumage throat	feather length	Fitness	reproductive success	number of fledglings	1	1	0.185668	0.152499	-0.0810377	0.208514
PAIRED	WOS:000229856900018	2005	2005	Komdeur, J and Oorebeek, M and van Overveld, T and Cuthill, IC	Sturnus vulgaris	European starling	0.0325875	0.353912	correlational	plumage throat	chroma	Fitness	reproductive success	number of fledglings	1	1	-0.283172	0.152499	-0.255002	0.208514
PAIRED	WOS:000229856900018	2005	2005	Komdeur, J and Oorebeek, M and van Overveld, T and Cuthill, IC	Sturnus vulgaris	European starling	2.68937	0.488326	correlational	plumage throat	feather length	Fitness	timing of breeding	laying date	-1	-1	-0.345365	0.147442	-0.274538	0.188982
PAIRED	WOS:000229856900018	2005	2005	Komdeur, J and Oorebeek, M and van Overveld, T and Cuthill, IC	Sturnus vulgaris	European starling	0.0325875	0.353912	correlational	plumage throat	chroma	Fitness	timing of breeding	laying date	-1	-1	-0.159447	0.147442	-0.239698	0.188982
PAIRED	WOS:000391279300015	2016	2016	Montoya, Bibiana and Valverde, Mahara and Rojas, Emilio and Torres, Roxana	Sula leucogaster	Brown booby			correlational	gular skin	colour	Body Condition	stress	oxidative stress	1	1	0.455012	0.188982	0.331699	0.19245
PAIRED	WOS:000257912700002	2008	2008	Bitton, Pierre-Paul and Dawson, Russell D. and Ochs, Courtney L.	Tachycineta bicolor	Tree swallow	0.984972	0.179639	correlational	plumage rump	hue	Fitness	reproductive success	fledging success	1	1	0.244774	0.142857	0.0226239	0.109109
PAIRED	WOS:000306366400052	2012	2012	Simons, Mirre J. P. and Briga, Michael and Koetsier, Egbert and Folkertsma, Remco and Wubs, Matthias D. and Dijkstra, Cor and Verhulst, Simon	Taeniopygia guttata	Zebra finch	1.46006	0.295625	correlational	bill	hue	Fitness	reproductive success	number of fledglings	1	1	0.342828	0.176777	-0.189009	0.213201
PAIRED	WOS:000306366400052	2012	2012	Simons, Mirre J. P. and Briga, Michael and Koetsier, Egbert and Folkertsma, Remco and Wubs, Matthias D. and Dijkstra, Cor and Verhulst, Simon	Taeniopygia guttata	Zebra finch	1.46006	0.295625	correlational	bill	hue	Fitness	survival	survival	1	1	-0.352246	0.124035	-0.337841	0.120386
PAIRED	WOS:000298129700019	2011	2011	Rowe, Karen M. C. and Weatherhead, Patrick J.	Turdus migratorius	American robin	0.606857	0.268668	correlational	plumage breast	colour	Fitness	offspring quality or condition	nestling condition	1	1	0.429843	0.27735	-0.680197	0.408248
PAIRED	WOS:000298129700019	2011	2011	Rowe, Karen M. C. and Weatherhead, Patrick J.	Turdus migratorius	American robin	0.606857	0.268668	correlational	plumage breast	colour	Fitness	parental quality	nestling defense	1	1	0.0591615	0.208514	-0.535313	0.27735
PAIRED	WOS:000298129700019	2011	2011	Rowe, Karen M. C. and Weatherhead, Patrick J.	Turdus migratorius	American robin	0.606857	0.268668	correlational	plumage breast	colour	Fitness	parental quality	nestling provisioning	1	1	0.00745349	0.223607	0.0149066	0.301511
PAIRED	WOS:000298129700019	2011	2011	Rowe, Karen M. C. and Weatherhead, Patrick J.	Turdus migratorius	American robin	0.606857	0.268668	correlational	plumage breast	colour	Fitness	reproductive success	extra-pair paternity	1	-1	0.183217	0.176777	0.21177	0.25
PAIRED	WOS:000298129700019	2011	2011	Rowe, Karen M. C. and Weatherhead, Patrick J.	Turdus migratorius	American robin	0.606857	0.268668	correlational	plumage breast	colour	Fitness	reproductive success	number of fledglings	1	1	0.446592	0.188982	-0.188067	0.267261
PAIRED	WOS:000298129700019	2011	2011	Rowe, Karen M. C. and Weatherhead, Patrick J.	Turdus migratorius	American robin	0.606857	0.268668	correlational	plumage breast	colour	Fitness	timing of breeding	laying date	-1	-1	-0.164642	0.174078	-0.156638	0.235702
PAIRED	WOS:000298129700019	2011	2011	Rowe, Karen M. C. and Weatherhead, Patrick J.	Turdus migratorius	American robin	0.23184	0.228724	correlational	plumage tail spots	size	Body Condition	body condition	tail damage	-1	-1	-0.140926	0.182574	-0.140926	0.188982
PAIRED	WOS:000298129700019	2011	2011	Rowe, Karen M. C. and Weatherhead, Patrick J.	Turdus migratorius	American robin	0.606857	0.268668	correlational	plumage breast	colour	Body Condition	body condition	tail damage	-1	-1	-0.56273	0.176777	-0.202733	0.223607
PAIRED	WOS:000298129700019	2011	2011	Rowe, Karen M. C. and Weatherhead, Patrick J.	Turdus migratorius	American robin	0.606857	0.268668	correlational	plumage breast	colour	Body Condition	body condition	mass corrected by size (residuals)	1	1	0.197968	0.174078	0.531783	0.223607
PAIRED	WOS:000087149700014	2000	2000	Roulin, A and Jungi, TW and Pfister, H and Dijkstra, C	Tyto alba	Barn owl	-0.83829	0.126717	correlational	plumage spots	coverage	Fitness	offspring quality or condition	antibody response	1	1	0.376886	0.169031	-0.15114	0.174078
PAIRED	WOS:000169755900007	2001a	2001	Roulin, A and Dijkstra, C and Riols, C and Ducrest, AL	Tyto alba	Barn owl	-1.06037	0.223933	correlational	plumage ventral area	colour	Fitness	reproductive success	brood size at fledging	-1	-1	-0.120581	0.182574	-0.183017	0.0800641
PAIRED	WOS:000169755900007	2001a	2001	Roulin, A and Dijkstra, C and Riols, C and Ducrest, AL	Tyto alba	Barn owl	-1.06037	0.223933	correlational	plumage ventral area	colour	Body Condition	body condition	heart mass	-1	-1	-0.212125	0.142857	-0.218854	0.160128
PAIRED	WOS:000180748500008	2003	2003	Roulin, A and Ducrest, AL and Balloux, F and Dijkstra, C and Riols, C	Tyto alba	Barn owl	-0.83829	0.126717	correlational	plumage ventral area (undperparts)	spottiness	Fitness	offspring quality or condition	nestling fluctuating asymmetry	-1	-1	-0.331647	0.158114	-0.110447	0.176777
PAIRED	WOS:000304033000015	2012	2012	Almasi, B. and Roulin, A. and Korner-Nievergelt, F. and Jenni-Eiermann, S. and Jenni, L.	Tyto alba	Barn owl	-1.01091	0.344775	experimental	plumage underparts (ventral) spots	size	Body Condition	body size	body mass	1	1	0.512126	0.166667	0.519093	0.166667
PAIRED	WOS:000403146600004	2017	2017	Quinard, Aurelie and Cezilly, Frank and Motreuil, Sebastien and Rossi, Jean-Marc and Biard, Clotilde	Zenaida aurita	Zenaida dove	1.09685	0.195835	correlational	plumage crown	hue	Body Condition	body size	wing chord length	-1	-1	-0.630906	0.132453	-0.113365	0.130189
PAIRED	WOS:000403146600004	2017	2017	Quinard, Aurelie and Cezilly, Frank and Motreuil, Sebastien and Rossi, Jean-Marc and Biard, Clotilde	Zenaida aurita	Zenaida dove	-0.231851	0.183199	correlational	plumage ear coverts patches (streaks)	hue	Body Condition	body size	wing chord length	-1	-1	0.377044	0.132453	-0.0435995	0.130189
PAIRED	WOS:000403146600004	2017	2017	Quinard, Aurelie and Cezilly, Frank and Motreuil, Sebastien and Rossi, Jean-Marc and Biard, Clotilde	Zenaida aurita	Zenaida dove	0.276883	0.18346	correlational	plumage ear coverts patches (streaks)	brightness	Body Condition	body size	wing chord length	-1	-1	0.093093	0.132453	0.114705	0.130189
PAIRED	WOS:000403146600004	2017	2017	Quinard, Aurelie and Cezilly, Frank and Motreuil, Sebastien and Rossi, Jean-Marc and Biard, Clotilde	Zenaida aurita	Zenaida dove	-0.231851	0.183199	correlational	plumage ear coverts patches (streaks)	hue	Body Condition	body condition	mass corrected by size (scaled mass index)	-1	-1	-0.0703223	0.132453	0.132922	0.130189
PAIRED	WOS:000403146600004	2017	2017	Quinard, Aurelie and Cezilly, Frank and Motreuil, Sebastien and Rossi, Jean-Marc and Biard, Clotilde	Zenaida aurita	Zenaida dove	0.276883	0.18346	correlational	plumage ear coverts patches (streaks)	brightness	Body Condition	body condition	mass corrected by size (scaled mass index)	-1	-1	-0.263239	0.132453	0.0899693	0.130189
PAIRED	WOS:000403146600004	2017	2017	Quinard, Aurelie and Cezilly, Frank and Motreuil, Sebastien and Rossi, Jean-Marc and Biard, Clotilde	Zenaida aurita	Zenaida dove	-0.436646	0.18475	correlational	plumage neck patch	hue	Body Condition	body size	wing chord length	-1	-1	0.109668	0.132453	0.119989	0.130189
PAIRED	WOS:000403146600004	2017	2017	Quinard, Aurelie and Cezilly, Frank and Motreuil, Sebastien and Rossi, Jean-Marc and Biard, Clotilde	Zenaida aurita	Zenaida dove	0.424901	0.184636	correlational	plumage neck patch	brightness	Body Condition	body size	wing chord length	1	1	0.285919	0.132453	0.154984	0.130189
PAIRED	WOS:000403146600004	2017	2017	Quinard, Aurelie and Cezilly, Frank and Motreuil, Sebastien and Rossi, Jean-Marc and Biard, Clotilde	Zenaida aurita	Zenaida dove	-0.175798	0.182939	correlational	plumage neck patch	spectral position UV	Body Condition	body size	wing chord length	1	1	0.0219759	0.132453	0.197468	0.130189
PAIRED	WOS:000403146600004	2017	2017	Quinard, Aurelie and Cezilly, Frank and Motreuil, Sebastien and Rossi, Jean-Marc and Biard, Clotilde	Zenaida aurita	Zenaida dove	-0.0715875	0.182645	correlational	plumage neck patch	UV chroma	Body Condition	body size	wing chord length	1	1	0.0795851	0.132453	0.0359945	0.130189
PAIRED	WOS:000403146600004	2017	2017	Quinard, Aurelie and Cezilly, Frank and Motreuil, Sebastien and Rossi, Jean-Marc and Biard, Clotilde	Zenaida aurita	Zenaida dove	-0.172475	0.182926	correlational	plumage neck patch	spectral position 390-551	Body Condition	body size	wing chord length	1	1	-0.0274687	0.132453	-0.154584	0.130189
PAIRED	WOS:000403146600004	2017	2017	Quinard, Aurelie and Cezilly, Frank and Motreuil, Sebastien and Rossi, Jean-Marc and Biard, Clotilde	Zenaida aurita	Zenaida dove	0.231177	0.183196	correlational	plumage neck patch	spectral position 550-701	Body Condition	body size	wing chord length	1	1	0.0357062	0.132453	-0.0392284	0.130189
PAIRED	WOS:000403146600004	2017	2017	Quinard, Aurelie and Cezilly, Frank and Motreuil, Sebastien and Rossi, Jean-Marc and Biard, Clotilde	Zenaida aurita	Zenaida dove	-0.436646	0.18475	correlational	plumage neck patch	hue	Body Condition	body condition	mass corrected by size (scaled mass index)	-1	-1	-0.265886	0.132453	0.262999	0.130189
PAIRED	WOS:000403146600004	2017	2017	Quinard, Aurelie and Cezilly, Frank and Motreuil, Sebastien and Rossi, Jean-Marc and Biard, Clotilde	Zenaida aurita	Zenaida dove	0.424901	0.184636	correlational	plumage neck patch	brightness	Body Condition	body condition	mass corrected by size (scaled mass index)	1	1	-0.0678986	0.132453	0.10987	0.130189
PAIRED	WOS:000403146600004	2017	2017	Quinard, Aurelie and Cezilly, Frank and Motreuil, Sebastien and Rossi, Jean-Marc and Biard, Clotilde	Zenaida aurita	Zenaida dove	-0.175798	0.182939	correlational	plumage neck patch	spectral position UV	Body Condition	body condition	mass corrected by size (scaled mass index)	1	1	-0.285919	0.132453	-0.050873	0.130189
PAIRED	WOS:000403146600004	2017	2017	Quinard, Aurelie and Cezilly, Frank and Motreuil, Sebastien and Rossi, Jean-Marc and Biard, Clotilde	Zenaida aurita	Zenaida dove	-0.0715875	0.182645	correlational	plumage neck patch	UV chroma	Body Condition	body condition	mass corrected by size (scaled mass index)	1	1	-0.157438	0.132453	-0.064187	0.130189
PAIRED	WOS:000403146600004	2017	2017	Quinard, Aurelie and Cezilly, Frank and Motreuil, Sebastien and Rossi, Jean-Marc and Biard, Clotilde	Zenaida aurita	Zenaida dove	-0.172475	0.182926	correlational	plumage neck patch	spectral position 390-551	Body Condition	body condition	mass corrected by size (scaled mass index)	1	1	0.205183	0.132453	0.130945	0.130189
PAIRED	WOS:000403146600004	2017	2017	Quinard, Aurelie and Cezilly, Frank and Motreuil, Sebastien and Rossi, Jean-Marc and Biard, Clotilde	Zenaida aurita	Zenaida dove	-0.0187097	0.182591	correlational	plumage neck patch	chroma 390-551	Body Condition	body condition	mass corrected by size (scaled mass index)	1	1	0.507652	0.132453	-0.0149685	0.130189
PAIRED	WOS:000403146600004	2017	2017	Quinard, Aurelie and Cezilly, Frank and Motreuil, Sebastien and Rossi, Jean-Marc and Biard, Clotilde	Zenaida aurita	Zenaida dove	0.231177	0.183196	correlational	plumage neck patch	spectral position 550-701	Body Condition	body condition	mass corrected by size (scaled mass index)	1	1	-0.0554416	0.132453	-0.127571	0.130189
PAIRED	WOS:000395510000012	2017	2017	Grunst, Andrea S. and Grunst, Melissa L. and Rathbun, Nathan A. and Hubbard, Joanna K. and Safran, Rebecca J. and Gonser, Rusty A. and Tuttle, Elaina M.	Zonotrichia albicollis	White throated sparrow	0.342819	0.21602	correlational	plumage crown stripes (white morph)	contrast	Fitness	reproductive success	reproductive success	1	1	0.279039	0.162221	0.345282	0.149071
PAIRED	WOS:000395510000012	2017	2017	Grunst, Andrea S. and Grunst, Melissa L. and Rathbun, Nathan A. and Hubbard, Joanna K. and Safran, Rebecca J. and Gonser, Rusty A. and Tuttle, Elaina M.	Zonotrichia albicollis	White throated sparrow	0.834273	0.219825	correlational	plumage crown stripes (tan morph)	contrast	Fitness	reproductive success	reproductive success	1	1	-0.172719	0.150756	-0.417671	0.145865
PAIRED	WOS:000395510000012	2017	2017	Grunst, Andrea S. and Grunst, Melissa L. and Rathbun, Nathan A. and Hubbard, Joanna K. and Safran, Rebecca J. and Gonser, Rusty A. and Tuttle, Elaina M.	Zonotrichia albicollis	White throated sparrow	0.508912	0.151892	correlational	plumage crown stripes	contrast	Fitness	survival	survival	1	1	-0.0383523	0.118678	0.00746	0.1026
UNPAIRED	WOS:000398573200008	2017	2017	Blizard, Misha and Pruett-Jones, Stephen	Actitis macularius	Spotted sandpiper			correlational	plumage ventral spots	coverage	Body Condition	body size	body mass	1		0.669922	0.185695
UNPAIRED	WOS:000398573200008	2017	2017	Blizard, Misha and Pruett-Jones, Stephen	Actitis macularius	Spotted sandpiper			correlational	plumage ventral spots	coverage	Body Condition	body condition	hematocrite	1		0.663988	0.185695
UNPAIRED	WOS:000361007700006	2015	2015	van Dijk, Rene E. and Robles, Raquel and Groothuis, Ton G. G. and de Vries, Bonnie and Eising, Corine M.	Apalis thoracica	Bar throated apalis			correlational	plumage breast band	size	Fitness	offspring quality or condition	egg mass	1		-0.697611	0.353553
UNPAIRED	WOS:000361007700006	2015	2015	van Dijk, Rene E. and Robles, Raquel and Groothuis, Ton G. G. and de Vries, Bonnie and Eising, Corine M.	Apalis thoracica	Bar throated apalis			correlational	plumage breast band	size	Fitness	reproductive success	number of clutches	1		-0.31543	0.377964
UNPAIRED	WOS:000310801400011	2012	2012	Aviles, Jesus M. and Parejo, Deseada	Athene noctua	Little owl			correlational	bill	brightness	Fitness	offspring quality or condition	nestling mass	1		0.661095	0.288675
UNPAIRED	WOS:000310801400011	2012	2012	Aviles, Jesus M. and Parejo, Deseada	Athene noctua	Little owl			correlational	bill	chroma	Fitness	offspring quality or condition	nestling mass	1		-0.305644	0.288675
UNPAIRED	WOS:000310801400011	2012	2012	Aviles, Jesus M. and Parejo, Deseada	Athene noctua	Little owl			correlational	bill	brightness	Fitness	reproductive success	number of fledglings	1		0.0377875	0.258199
UNPAIRED	WOS:000310801400011	2012	2012	Aviles, Jesus M. and Parejo, Deseada	Athene noctua	Little owl			correlational	bill	chroma	Fitness	reproductive success	number of fledglings	1		0.573393	0.258199
UNPAIRED	WOS:000310801400011	2012	2012	Aviles, Jesus M. and Parejo, Deseada	Athene noctua	Little owl			correlational	bill	brightness	Body Condition	body size	tarsus length	1		0.626381	0.258199
UNPAIRED	WOS:000310801400011	2012	2012	Aviles, Jesus M. and Parejo, Deseada	Athene noctua	Little owl			correlational	bill	chroma	Body Condition	body size	tarsus length	1		0.0654187	0.258199
UNPAIRED	WOS:000310801400011	2012	2012	Aviles, Jesus M. and Parejo, Deseada	Athene noctua	Little owl			correlational	bill	brightness	Body Condition	body condition	mass corrected by size (residuals)	1		-0.011952	0.258199
UNPAIRED	WOS:000310801400011	2012	2012	Aviles, Jesus M. and Parejo, Deseada	Athene noctua	Little owl			correlational	bill	chroma	Body Condition	body condition	mass corrected by size (residuals)	1		-0.236826	0.258199
UNPAIRED	WOS:000221541600007	2004	2004	Jawor, JM and Gray, N and Beall, SM and Breitwisch, R	Cardinalis cardinalis	Northern cardinal			correlational	mask score	size and darkness	Fitness	parental quality	feeding rate	1		0.484861	0.223607
UNPAIRED	WOS:000221541600007	2004	2004	Jawor, JM and Gray, N and Beall, SM and Breitwisch, R	Cardinalis cardinalis	Northern cardinal			correlational	underwing feather colour	brightness mainly	Fitness	reproductive success	reproductive success (number of fledged nests)	1		0.558715	0.174078
UNPAIRED	WOS:000221541600007	2004	2004	Jawor, JM and Gray, N and Beall, SM and Breitwisch, R	Cardinalis cardinalis	Northern cardinal			correlational	underwing feathers colour	brightness mainly	Fitness	timing of breeding	date of first nest	-1		-0.42869	0.179605
UNPAIRED	WOS:000221541600007	2004	2004	Jawor, JM and Gray, N and Beall, SM and Breitwisch, R	Cardinalis cardinalis	Northern cardinal			correlational	underwing feather colour	brightness mainly	Body Condition	body size	wing chord length	1		0.280937	0.113228
UNPAIRED	WOS:000221541600007	2004	2004	Jawor, JM and Gray, N and Beall, SM and Breitwisch, R	Cardinalis cardinalis	Northern cardinal			correlational	bill colour	brightness mainly	Body Condition	body size	wing chord length	1		0.313252	0.113228
UNPAIRED	WOS:000221541600007	2004	2004	Jawor, JM and Gray, N and Beall, SM and Breitwisch, R	Cardinalis cardinalis	Northern cardinal			correlational	bill colour	brightness mainly	Body Condition	body condition	mass corrected by size (residuals)	1		0.229742	0.113228
UNPAIRED	WOS:000221541600007	2004	2004	Jawor, JM and Gray, N and Beall, SM and Breitwisch, R	Cardinalis cardinalis	Northern cardinal			correlational	underwing feathers colour	brightness mainly	Body Condition	body condition	mass corrected by size (residuals)	1		0.306813	0.113228
UNPAIRED	WOS:000305396400004	2012	2012	Kelly, Ryan J. and Murphy, Troy G. and Tarvin, Keith A. and Burness, Gary	Spinus tristis	American goldfinch			correlational	bill	hue	Body Condition	body condition	oxygen consumption oxygen as an index of RMR	1		0.223656	0.258199
UNPAIRED	WOS:000305396400004	2012	2012	Kelly, Ryan J. and Murphy, Troy G. and Tarvin, Keith A. and Burness, Gary	Spinus tristis	American goldfinch			correlational	plumage throat	hue	Body Condition	body condition	oxygen consumption oxygen as an index of RMR	1		0.171667	0.258199
UNPAIRED	WOS:000305396400004	2012	2012	Kelly, Ryan J. and Murphy, Troy G. and Tarvin, Keith A. and Burness, Gary	Spinus tristis	American goldfinch			correlational	bill	saturation	Body Condition	immunity	immunoglobulins	1		0.660957	0.242536
UNPAIRED	WOS:000305396400004	2012	2012	Kelly, Ryan J. and Murphy, Troy G. and Tarvin, Keith A. and Burness, Gary	Spinus tristis	American goldfinch			correlational	bill	saturation	Body Condition	immunity	natural antibodies	1		0.43441	0.258199
UNPAIRED	WOS:000305396400004	2012	2012	Kelly, Ryan J. and Murphy, Troy G. and Tarvin, Keith A. and Burness, Gary	Spinus tristis	American goldfinch			correlational	bill	hue	Body Condition	stress	heterophil:lymphocyte ratio used as an indicator of stress	-1		-0.721763	0.229416
UNPAIRED	WOS:000305396400004	2012	2012	Kelly, Ryan J. and Murphy, Troy G. and Tarvin, Keith A. and Burness, Gary	Spinus tristis	American goldfinch			correlational	plumage throat	hue	Body Condition	stress	heterophil:lymphocyte ratio used as an indicator of stress	-1		0.0236044	0.229416
UNPAIRED	WOS:000452062100078	2016	2016	Tarvin, Keith A. and Wong, L. Jin and Lumpkin, David C. and Schroeder, Gabrielle M. and D'Andrea, Dominic and Meade, Sophie and Rivers, Pearl and Murphy, Troy G.	Spinus tristis	American goldfinch			experimental	bill colour	brightness	Body Condition	stress	clipped wings (stressor reflected in heheterophil:lymphocyte ratio)	1		0.107561	0.223607
UNPAIRED	WOS:000452062100078	2016	2016	Tarvin, Keith A. and Wong, L. Jin and Lumpkin, David C. and Schroeder, Gabrielle M. and D'Andrea, Dominic and Meade, Sophie and Rivers, Pearl and Murphy, Troy G.	Spinus tristis	American goldfinch			experimental	bill colour	saturation	Body Condition	stress	clipped wings (stressor reflected in heheterophil:lymphocyte ratio)	1		0.182874	0.223607
UNPAIRED	WOS:000452062100078	2016	2016	Tarvin, Keith A. and Wong, L. Jin and Lumpkin, David C. and Schroeder, Gabrielle M. and D'Andrea, Dominic and Meade, Sophie and Rivers, Pearl and Murphy, Troy G.	Spinus tristis	American goldfinch			experimental	bill colour	hue	Body Condition	stress	clipped wings (stressor reflected in heheterophil:lymphocyte ratio)	1		0.0367717	0.223607
UNPAIRED	WOS:000230719700013	2005	2005	Amat, JA	Charadrius alexandrinus	Kentish plover			correlational	plumage head frontal bar	presence	Fitness	offspring quality or condition	egg volume	1		1.1987	0.57735
UNPAIRED	WOS:000230719700013	2005	2005	Amat, JA	Charadrius alexandrinus	Kentish plover			correlational	plumage head frontal bar	presence	Fitness	timing of breeding	laying date	1		0.16661	0.57735
UNPAIRED	WOS:000230719700013	2005	2005	Amat, JA	Charadrius alexandrinus	Kentish plover			correlational	plumage head frontal bar	presence	Body Condition	body size	body mass	1		0.475821	0.5
UNPAIRED	WOS:000282823800006	2010	2010	Gladbach, Anja and Gladbach, David Joachim and Kempenaers, Bart and Quillfeldt, Petra	Chloephaga picta	Upland goose			correlational	skin tarsus	colour intensity	Fitness	offspring quality or condition	mean egg volume	1		0.589614	0.242536
UNPAIRED	WOS:000282823800006	2010	2010	Gladbach, Anja and Gladbach, David Joachim and Kempenaers, Bart and Quillfeldt, Petra	Chloephaga picta	Upland goose			correlational	plumage head	colour intensity	Fitness	offspring quality or condition	mean egg volume	-1		-0.498783	0.242536
UNPAIRED	WOS:000282823800006	2010	2010	Gladbach, Anja and Gladbach, David Joachim and Kempenaers, Bart and Quillfeldt, Petra	Chloephaga picta	Upland goose			correlational	skin tarsus	colour intensity	Fitness	reproductive success	clutch volume	1		0.678188	0.242536
UNPAIRED	WOS:000282823800006	2010	2010	Gladbach, Anja and Gladbach, David Joachim and Kempenaers, Bart and Quillfeldt, Petra	Chloephaga picta	Upland goose			correlational	plumage head	colour intensity	Body Condition	body condition	mass corrected by size (ratio, observed mass vs expected after controlling for size and chick age)	-1		-0.418969	0.160128
UNPAIRED	WOS:000336484600010	2014	2014	Grunst, Andrea S. and Rotenberry, John T. and Grunst, Melissa L.	Setophaga petechia	Yellow warbler			correlational	plumage breast	melanin coverage	Body Condition	body condition	feather quality or condition	1		0.406554	0.158114
UNPAIRED	WOS:000430212700008	2018	2018	Funghi, Caterina and Trigo, Sandra and Gomes, Ana Cristina R. and Soares, Marta C. and Cardoso, Goncalo C.	Estrilda astrild	Common waxbill			correlational	bill colour	saturation	Body Condition	stress	temperature	1		0.172727	0.0816497
UNPAIRED	WOS:000430212700008	2018	2018	Funghi, Caterina and Trigo, Sandra and Gomes, Ana Cristina R. and Soares, Marta C. and Cardoso, Goncalo C.	Estrilda astrild	Common waxbill			correlational	bill colour	saturation	Body Condition	stress	temperature	1		0.171784	0.0816497
UNPAIRED	WOS:000430212700008	2018	2018	Funghi, Caterina and Trigo, Sandra and Gomes, Ana Cristina R. and Soares, Marta C. and Cardoso, Goncalo C.	Estrilda astrild	Common waxbill			correlational	bill colour	saturation	Body Condition	stress	temperature	1		0.179721	0.0816497
UNPAIRED	WOS:000430212700008	2018	2018	Funghi, Caterina and Trigo, Sandra and Gomes, Ana Cristina R. and Soares, Marta C. and Cardoso, Goncalo C.	Estrilda astrild	Common waxbill			correlational	bill colour	saturation	Body Condition	stress	temperature	1		0.182583	0.0816497
UNPAIRED	WOS:000430212700008	2018	2018	Funghi, Caterina and Trigo, Sandra and Gomes, Ana Cristina R. and Soares, Marta C. and Cardoso, Goncalo C.	Estrilda astrild	Common waxbill			correlational	bill colour	saturation	Body Condition	stress	temperature	1		0.170837	0.0816497
UNPAIRED	WOS:000268260700007	2009	2009	Vergara, Pablo and Fargallo, Juan A. and Martinez-Padilla, Jesus and Lemus, Jesus A.	Falco tinnunculus	Common kestrel			correlational	plumage rump	colouration	Fitness	reproductive success	clutch size	1		0.228152	0.065938
UNPAIRED	WOS:000371069800030	2016	2016	Lopez-Idiaquez, David and Vergara, Pablo and Antonio Fargallo, Juan and Martinez-Padilla, Jesus	Falco tinnunculus	Common kestrel			correlational	plumage dorsal spots	number	Fitness	timing of breeding	laying date	-1		0.301532	0.0873704
UNPAIRED	WOS:000371069800030	2016	2016	Lopez-Idiaquez, David and Vergara, Pablo and Antonio Fargallo, Juan and Martinez-Padilla, Jesus	Falco tinnunculus	Common kestrel			correlational	plumage dorsal spots	size	Body Condition	body size	body mass	1		0.274489	0.0873704
UNPAIRED	WOS:000268260700007	2009	2009	Vergara, Pablo and Fargallo, Juan A. and Martinez-Padilla, Jesus and Lemus, Jesus A.	Falco tinnunculus	Common kestrel			correlational	plumage tail band	size	Body Condition	body size	tail length	1		0.353431	0.0573539
UNPAIRED	WOS:000268260700007	2009	2009	Vergara, Pablo and Fargallo, Juan A. and Martinez-Padilla, Jesus and Lemus, Jesus A.	Falco tinnunculus	Common kestrel			correlational	plumage tail band	size	Body Condition	body size	wing length	1		0.255413	0.057639
UNPAIRED	WOS:000268260700007	2009	2009	Vergara, Pablo and Fargallo, Juan A. and Martinez-Padilla, Jesus and Lemus, Jesus A.	Falco tinnunculus	Common kestrel			correlational	plumage rump	colouration	Body Condition	environment	environmental conditions	1		0.236341	0.0648204
UNPAIRED	WOS:000287753000008	2011	2011	Parejo, Deseada and Silva, Nadia and Danchin, Etienne and Aviles, Jesus M.	Falco tinnunculus	Common kestrel			correlational	plumage head	yellow red chroma and hue	Fitness	timing of breeding	laying date (check all laying date because may have to be more with role rather than quality)	-1		-0.317247	0.131306
UNPAIRED	WOS:000287753000008	2011	2011	Parejo, Deseada and Silva, Nadia and Danchin, Etienne and Aviles, Jesus M.	Falco tinnunculus	Common kestrel			correlational	plumage head	brightness	Body Condition	body condition	mass corrected by size (covariate)	-1		0.338873	0.125988
UNPAIRED	WOS:000287753000008	2011	2011	Parejo, Deseada and Silva, Nadia and Danchin, Etienne and Aviles, Jesus M.	Falco tinnunculus	Common kestrel			correlational	plumage rump	low UV chroma and high brightness	Body Condition	body condition	mass corrected by size (covariate)	-1		-0.334032	0.125988
UNPAIRED	WOS:000328127700009	2013	2013	Laczi, Miklos and Hegyi, Gergely and Herenyi, Marton and Kiss, Dorottya and Marko, Gabor and Nagy, Gergely and Rosivall, Balazs and Szoellosi, Eszter and Toeroek, Janos	Ficedula albicollis	Collared flycatcher			correlational	plumage composite (mainly wing)	brightness	Body Condition	body condition	past residual clutch size (previous breeding effort)	1		0.192337	0.100504
UNPAIRED	WOS:000328127700009	2013	2013	Laczi, Miklos and Hegyi, Gergely and Herenyi, Marton and Kiss, Dorottya and Marko, Gabor and Nagy, Gergely and Rosivall, Balazs and Szoellosi, Eszter and Toeroek, Janos	Ficedula albicollis	Collared flycatcher			correlational	plumage composite (forehead, crown and breast)	brightness	Body Condition	body condition	past residual body mass (mass corrected by size)	-1		-0.234189	0.100504
UNPAIRED	WOS:000388349800010	2016	2016	Kotel, Dora and Laczi, Miklos and Torok, Janos and Hegyi, Gergely	Ficedula albicollis	Collared flycatcher			correlational	plumage wing patch	size	Fitness	parental quality	incubation rate	1		-0.318368	0.152499
UNPAIRED	WOS:000388349800010	2016	2016	Kotel, Dora and Laczi, Miklos and Torok, Janos and Hegyi, Gergely	Ficedula albicollis	Collared flycatcher			correlational	plumage composite	brightness	Fitness	parental quality	incubation rate	1		0	0.152499
UNPAIRED	WOS:000388349800010	2016	2016	Kotel, Dora and Laczi, Miklos and Torok, Janos and Hegyi, Gergely	Ficedula albicollis	Collared flycatcher			correlational	plumage composite	UV chroma	Fitness	parental quality	incubation rate	1		0.0773824	0.152499
UNPAIRED	WOS:000388349800010	2016	2016	Kotel, Dora and Laczi, Miklos and Torok, Janos and Hegyi, Gergely	Ficedula albicollis	Collared flycatcher			correlational	plumage wing patch	size	Fitness	parental quality	visiting rate	-1		0.332119	0.152499
UNPAIRED	WOS:000388349800010	2016	2016	Kotel, Dora and Laczi, Miklos and Torok, Janos and Hegyi, Gergely	Ficedula albicollis	Collared flycatcher			correlational	plumage composite	brightness	Fitness	parental quality	visiting rate	-1		0.0785986	0.152499
UNPAIRED	WOS:000388349800010	2016	2016	Kotel, Dora and Laczi, Miklos and Torok, Janos and Hegyi, Gergely	Ficedula albicollis	Collared flycatcher			correlational	plumage composite	UV chroma	Fitness	parental quality	visiting rate	-1		-0.0842747	0.152499
UNPAIRED	WOS:000254257500028	2008	2008	Hegyi, Gergely and Rosivall, Balazs and Szollosi, Eszter and Hargitai, Rita and Eens, Marcel and Torok, Janos	Ficedula albicollis	Collared flycatcher			correlational	plumage wing patch	size	Fitness	reproductive success	clutch size	1		0.0190023	0.0559017
UNPAIRED	WOS:000254257500028	2008	2008	Hegyi, Gergely and Rosivall, Balazs and Szollosi, Eszter and Hargitai, Rita and Eens, Marcel and Torok, Janos	Ficedula albicollis	Collared flycatcher			correlational	plumage wing patch	size	Fitness	reproductive success	clutch size	1		-0.214958	0.104828
UNPAIRED	WOS:000244984200008	2006	2006	Gil, Diego and Lacroix, Andre and Potti, Jaime	Ficedula hypoleuca	Pied flycatcher			correlational	plumage forehead patch	absense/presence	Fitness	offspring quality or condition	yolk testosterone	-1		0.775402	0.149071
UNPAIRED	WOS:000244984200008	2006	2006	Gil, Diego and Lacroix, Andre and Potti, Jaime	Ficedula hypoleuca	Pied flycatcher			correlational	plumage forehead patch	absense/presence	Fitness	offspring quality or condition	androstenedione	-1		0.123998	0.149071
UNPAIRED	WOS:000322003000006	2013	2013	Potti, J. and Canal, D. and Serrano, D.	Ficedula hypoleuca	Pied flycatcher			correlational	plumage forehead patch	presence (expression itself)	Fitness	reproductive success	clutch size	-1		-0.0617363	0.0344418
UNPAIRED	WOS:000322003000006	2013	2013	Potti, J. and Canal, D. and Serrano, D.	Ficedula hypoleuca	Pied flycatcher			correlational	plumage forehead patch	presence (expression itself)	Fitness	reproductive success	fledging success	-1		-0.0557225	0.0540738
UNPAIRED	WOS:000322003000006	2013	2013	Potti, J. and Canal, D. and Serrano, D.	Ficedula hypoleuca	Pied flycatcher			correlational	plumage forehead patch	presence (expression itself)	Fitness	reproductive success	number of eggs	-1		-0.0774151	0.0543125
UNPAIRED	WOS:000322003000006	2013	2013	Potti, J. and Canal, D. and Serrano, D.	Ficedula hypoleuca	Pied flycatcher			correlational	plumage forehead patch	presence (expression at early age or not)	Fitness	reproductive success	recruitment	-1		-0.0537096	0.0540738
UNPAIRED	WOS:000322003000006	2013	2013	Potti, J. and Canal, D. and Serrano, D.	Ficedula hypoleuca	Pied flycatcher			correlational	plumage forehead patch	presence (expression at early age or not)	Fitness	survival	survival	1		0.187644	0.0540738
UNPAIRED	WOS:000245312000006	2007	2007	Morales, Judith and Moreno, Juan and Merino, Santiago and Sanz, Juan J. and Tomas, Gustavo and Arriero, Elena and Lobato, Elisa and Martonez-De La Puente, Josue	Ficedula hypoleuca	Pied flycatcher			correlational	plumage forehead patch	presence (expression itself)	Fitness	reproductive success	number of fledglings	1		0.128788	0.057735
UNPAIRED	WOS:000245312000006	2007	2007	Morales, Judith and Moreno, Juan and Merino, Santiago and Sanz, Juan J. and Tomas, Gustavo and Arriero, Elena and Lobato, Elisa and Martonez-De La Puente, Josue	Ficedula hypoleuca	Pied flycatcher			correlational	plumage wing patch	size	Fitness	reproductive success	number of hatchlings	1		0.284659	0.108465
UNPAIRED	WOS:000245312000006	2007	2007	Morales, Judith and Moreno, Juan and Merino, Santiago and Sanz, Juan J. and Tomas, Gustavo and Arriero, Elena and Lobato, Elisa and Martonez-De La Puente, Josue	Ficedula hypoleuca	Pied flycatcher			correlational	plumage wing patch	size	Fitness	timing of breeding	laying date	-1		-0.313817	0.108465
UNPAIRED	WOS:000245312000006	2007	2007	Morales, Judith and Moreno, Juan and Merino, Santiago and Sanz, Juan J. and Tomas, Gustavo and Arriero, Elena and Lobato, Elisa and Martonez-De La Puente, Josue	Ficedula hypoleuca	Pied flycatcher			correlational	plumage wing patch	presence (expression itself)	Body Condition	immunity	immunoglobulins	1		0.51007	0.185695
UNPAIRED	WOS:000245312000006	2007	2007	Morales, Judith and Moreno, Juan and Merino, Santiago and Sanz, Juan J. and Tomas, Gustavo and Arriero, Elena and Lobato, Elisa and Martonez-De La Puente, Josue	Ficedula hypoleuca	Pied flycatcher			correlational	plumage wing patch	presence (expression itself)	Body Condition	immunity	immunoglobulins	1		0.527625	0.185695
UNPAIRED	WOS:000334966800017	2014	2014	Freeman-Gallant, C. R. and Schneider, R. L. and Taff, C. C. and Dunn, P. O. and Whittingham, L. A.	Geothlypis trichas	Common yellowthroat			correlational	plumage throat (bib)	size	Fitness	reproductive success	clutch size	1		0.404805	0.121268
UNPAIRED	WOS:000334966800017	2014	2014	Freeman-Gallant, C. R. and Schneider, R. L. and Taff, C. C. and Dunn, P. O. and Whittingham, L. A.	Geothlypis trichas	Common yellowthroat			correlational	plumage throat (bib)	brightness	Fitness	reproductive success	clutch size	1		-0.249383	0.121268
UNPAIRED	WOS:000334966800017	2014	2014	Freeman-Gallant, C. R. and Schneider, R. L. and Taff, C. C. and Dunn, P. O. and Whittingham, L. A.	Geothlypis trichas	Common yellowthroat			correlational	plumage throat (bib)	chroma	Fitness	reproductive success	clutch size	1		-0.37726	0.121268
UNPAIRED	WOS:000334966800017	2014	2014	Freeman-Gallant, C. R. and Schneider, R. L. and Taff, C. C. and Dunn, P. O. and Whittingham, L. A.	Geothlypis trichas	Common yellowthroat			correlational	plumage throat (bib)	UV saturation	Fitness	reproductive success	clutch size	1		-0.1858	0.121268
UNPAIRED	WOS:000334966800017	2014	2014	Freeman-Gallant, C. R. and Schneider, R. L. and Taff, C. C. and Dunn, P. O. and Whittingham, L. A.	Geothlypis trichas	Common yellowthroat			correlational	plumage throat (bib)	size	Fitness	reproductive success	presence of a second brood	1		-0.00888129	0.121268
UNPAIRED	WOS:000334966800017	2014	2014	Freeman-Gallant, C. R. and Schneider, R. L. and Taff, C. C. and Dunn, P. O. and Whittingham, L. A.	Geothlypis trichas	Common yellowthroat			correlational	plumage throat (bib)	brightness	Fitness	reproductive success	presence of a second brood	1		0.141356	0.121268
UNPAIRED	WOS:000334966800017	2014	2014	Freeman-Gallant, C. R. and Schneider, R. L. and Taff, C. C. and Dunn, P. O. and Whittingham, L. A.	Geothlypis trichas	Common yellowthroat			correlational	plumage throat (bib)	chroma	Fitness	reproductive success	presence of a second brood	1		0.201261	0.121268
UNPAIRED	WOS:000334966800017	2014	2014	Freeman-Gallant, C. R. and Schneider, R. L. and Taff, C. C. and Dunn, P. O. and Whittingham, L. A.	Geothlypis trichas	Common yellowthroat			correlational	plumage throat (bib)	UV saturation	Fitness	reproductive success	presence of a second brood	1		0.084116	0.121268
UNPAIRED	WOS:000334966800017	2014	2014	Freeman-Gallant, C. R. and Schneider, R. L. and Taff, C. C. and Dunn, P. O. and Whittingham, L. A.	Geothlypis trichas	Common yellowthroat			correlational	plumage throat (bib)	chroma	Fitness	survival	apparent survival (return)	1		-0.245098	0.121268
UNPAIRED	WOS:000334966800017	2014	2014	Freeman-Gallant, C. R. and Schneider, R. L. and Taff, C. C. and Dunn, P. O. and Whittingham, L. A.	Geothlypis trichas	Common yellowthroat			correlational	plumage throat (bib)	UV saturation	Fitness	survival	apparent survival (return)	1		-0.215577	0.121268
UNPAIRED	WOS:000334966800017	2014	2014	Freeman-Gallant, C. R. and Schneider, R. L. and Taff, C. C. and Dunn, P. O. and Whittingham, L. A.	Geothlypis trichas	Common yellowthroat			correlational	plumage throat (bib)	brightness	Fitness	survival	apparent survival (return)	1		0.130745	0.121268
UNPAIRED	WOS:000334966800017	2014	2014	Freeman-Gallant, C. R. and Schneider, R. L. and Taff, C. C. and Dunn, P. O. and Whittingham, L. A.	Geothlypis trichas	Common yellowthroat			correlational	plumage throat (bib)	size	Fitness	survival	apparent survival (return)	1		-0.084116	0.121268
UNPAIRED	WOS:000334966800017	2014	2014	Freeman-Gallant, C. R. and Schneider, R. L. and Taff, C. C. and Dunn, P. O. and Whittingham, L. A.	Geothlypis trichas	Common yellowthroat			correlational	plumage throat (bib)	size	Body Condition	body size	wing length	1		0.503473	0.111803
UNPAIRED	WOS:000388349800011	2016	2016	Hasegawa, Masaru and Arai, Emi and Ito, Shosuke and Wakamatsu, Kazumasa	Hirundo rustica	Barn swallow			correlational	plumage throat patch	saturation	Fitness	parental quality	brood patch temperature	-1		0.56603	0.204124
UNPAIRED	WOS:000388349800011	2016	2016	Hasegawa, Masaru and Arai, Emi and Ito, Shosuke and Wakamatsu, Kazumasa	Hirundo rustica	Barn swallow			correlational	plumage throat patch	size	Fitness	parental quality	brood patch temperature	1		0.104011	0.204124
UNPAIRED	WOS:000388349800011	2016	2016	Hasegawa, Masaru and Arai, Emi and Ito, Shosuke and Wakamatsu, Kazumasa	Hirundo rustica	Barn swallow			correlational	plumage tail	length	Fitness	parental quality	brood patch temperature	1		0.209387	0.204124
UNPAIRED	WOS:000388349800011	2016	2016	Hasegawa, Masaru and Arai, Emi and Ito, Shosuke and Wakamatsu, Kazumasa	Hirundo rustica	Barn swallow			correlational	plumage tail spots	size	Fitness	parental quality	brood patch temperature	1		-0.100335	0.204124
UNPAIRED	WOS:000388349800011	2016	2016	Hasegawa, Masaru and Arai, Emi and Ito, Shosuke and Wakamatsu, Kazumasa	Hirundo rustica	Barn swallow			correlational	plumage throat patch	pigment concentration	Fitness	parental quality	brood patch temperature	1		-0.554912	0.25
UNPAIRED	WOS:000221556500012	2004	2004	Safran, RJ and McGraw, KJ	Hirundo rustica	Barn swallow			correlational	plumage tail	length	Fitness	reproductive success	number of fledglings	1		0.143783	0.150756
UNPAIRED	WOS:000221556500012	2004	2004	Safran, RJ and McGraw, KJ	Hirundo rustica	Barn swallow			correlational	plumage belly	colour	Fitness	reproductive success	number of fledglings	-1		-0.436525	0.150756
UNPAIRED	WOS:000221556500012	2004	2004	Safran, RJ and McGraw, KJ	Hirundo rustica	Barn swallow			correlational	plumage breast	colour	Fitness	timing of breeding	laying date	1		0.302414	0.142857
UNPAIRED	WOS:000221556500012	2004	2004	Safran, RJ and McGraw, KJ	Hirundo rustica	Barn swallow			correlational	plumage belly	colour	Fitness	timing of breeding	laying date	1		0.46443	0.150756
UNPAIRED	WOS:000184534600001	2003	2003	Cuervo, JJ and Moller, AP and de Lope, F	Hirundo rustica	Barn swallow			experimental	plumage tail	length	Body Condition	body condition	number of nestlings	1		0.694799	0.267261
UNPAIRED	WOS:000184534600001	2003	2003	Cuervo, JJ and Moller, AP and de Lope, F	Hirundo rustica	Barn swallow			experimental	plumage tail	length	Body Condition	body condition	number of nestlings	1		0.686536	0.267261
UNPAIRED	WOS:000290515100015	2011	2011	Martinez-Padilla, J. and Vergara, P. and Perez-Rodriguez, L. and Mougeot, F. and Casas, F. and Ludwig, S. C. and Haines, J. A. and Zeineddine, M. and Redpath, S. M.	Lagopus lagopus	Red grouse			correlational	comb	size	Body Condition	body size	body mass	1		0.125271	0.054965
UNPAIRED	WOS:000290515100015	2011	2011	Martinez-Padilla, J. and Vergara, P. and Perez-Rodriguez, L. and Mougeot, F. and Casas, F. and Ludwig, S. C. and Haines, J. A. and Zeineddine, M. and Redpath, S. M.	Lagopus lagopus	Red grouse			experimental	comb	size	Body Condition	stress	reduction in parasite abundance with drug treatment can be considered a measure of stress reduction due to parasite load	-1		-0.78706	0.242536
UNPAIRED	WOS:000290515100015	2011	2011	Martinez-Padilla, J. and Vergara, P. and Perez-Rodriguez, L. and Mougeot, F. and Casas, F. and Ludwig, S. C. and Haines, J. A. and Zeineddine, M. and Redpath, S. M.	Lagopus lagopus	Red grouse			correlational	comb	size	Body Condition	parasites	parasite abundance	-1		-0.151705	0.054965
UNPAIRED	WOS:000297547300009	2011	2011	Vergara, Pablo and Martinez-Padilla, Jesus and Redpath, Stephen M. and Mougeot, Francois	Lagopus lagopus	Red grouse			correlational	comb	size	Body Condition	body size	body mass	1		0.196727	0.0519875
UNPAIRED	WOS:000229428400005	2005	2005	Mougeot, F and Redpath, SM and Leckie, F	Lagopus lagopus	Red grouse			correlational	comb	total brightness	Body Condition	parasites	parasite abundance	-1		-0.279555	0.133631
UNPAIRED	WOS:000440036000012	2018	2018	Pardal, Sara and Alves, Jose A. and Mota, Paulo G. and Ramos, Jaime A.	Limosa limosa	Black tailed godwit			correlational	plumage composite (ventral)	colour extent and bar extent	Body Condition	immunity	innate immunity	-1		0.0345137	0.160128
UNPAIRED	WOS:000088445500001	2000	2000	Smiseth, PT and Amundsen, T	Luscinia svecica	Bluethroat			correlational	plumage throat	extent	Fitness	offspring quality or condition	brood mass	1		0.741416	0.408248
UNPAIRED	WOS:000088445500001	2000	2000	Smiseth, PT and Amundsen, T	Luscinia svecica	Bluethroat			correlational	plumage throat	extent	Fitness	offspring quality or condition	brood mass change as a measure of parental care	1		0.00800017	0.2
UNPAIRED	WOS:000088445500001	2000	2000	Smiseth, PT and Amundsen, T	Luscinia svecica	Bluethroat			correlational	plumage throat	extent	Fitness	parental quality	feeding rate	1		-0.223656	0.2
UNPAIRED	WOS:000088445500001	2000	2000	Smiseth, PT and Amundsen, T	Luscinia svecica	Bluethroat			correlational	plumage throat	extent	Fitness	parental quality	feeding rate	1		-0.181983	0.2
UNPAIRED	WOS:000088445500001	2000	2000	Smiseth, PT and Amundsen, T	Luscinia svecica	Bluethroat			correlational	plumage throat	extent	Fitness	parental quality	feeding rate	1		-0.0600722	0.2
UNPAIRED	WOS:000088445500001	2000	2000	Smiseth, PT and Amundsen, T	Luscinia svecica	Bluethroat			correlational	plumage throat	extent	Fitness	parental quality	feeding rate	1		0.0500417	0.204124
UNPAIRED	WOS:000088445500001	2000	2000	Smiseth, PT and Amundsen, T	Luscinia svecica	Bluethroat			correlational	plumage throat	extent	Fitness	reproductive success	clutch size	1		-0.100335	0.223607
UNPAIRED	WOS:000088445500001	2000	2000	Smiseth, PT and Amundsen, T	Luscinia svecica	Bluethroat			correlational	plumage throat	extent	Fitness	timing of breeding	hatching date	-1		0.171667	0.223607
UNPAIRED	WOS:000088445500001	2000	2000	Smiseth, PT and Amundsen, T	Luscinia svecica	Bluethroat			correlational	plumage throat	extent	Body Condition	body size	body mass	1		0.0801713	0.204124
UNPAIRED	WOS:000088445500001	2000	2000	Smiseth, PT and Amundsen, T	Luscinia svecica	Bluethroat			correlational	plumage throat	extent	Body Condition	body size	tarsus length	1		-0.030009	0.196116
UNPAIRED	WOS:000088445500001	2000	2000	Smiseth, PT and Amundsen, T	Luscinia svecica	Bluethroat			correlational	plumage throat	extent	Body Condition	body condition	hematocrite	1		0.0902442	0.2
UNPAIRED	WOS:000088445500001	2000	2000	Smiseth, PT and Amundsen, T	Luscinia svecica	Bluethroat			correlational	plumage throat	extent	Body Condition	body condition	mass corrected by size (residuals)	1		0.100335	0.204124
UNPAIRED	WOS:A1997YJ40000005	1997	1997	Amundsen, T and Forsgren, E and Hansen, LTT	Luscinia svecica	Bluethroat			correlational	plumage throat patches	colouration	Body Condition	body size	body mass	1		0.354093	0.140028
UNPAIRED	WOS:A1997YJ40000005	1997	1997	Amundsen, T and Forsgren, E and Hansen, LTT	Luscinia svecica	Bluethroat			correlational	plumage throat patches	colouration	Body Condition	body size	tarsus length	1		0.287682	0.137361
UNPAIRED	WOS:000233908500017	2005	2005	Parn, H and Lifjeld, JT and Amundsen, T	Luscinia svecica	Bluethroat			correlational	plumage throat pacthes	size	Body Condition	body size	body mass	1		0.0952873	0.176777
UNPAIRED	WOS:000233908500017	2005	2005	Parn, H and Lifjeld, JT and Amundsen, T	Luscinia svecica	Bluethroat			correlational	plumage throat pacthes	size	Body Condition	body size	tarsus length	1		0.100335	0.116248
UNPAIRED	WOS:000233908500017	2005	2005	Parn, H and Lifjeld, JT and Amundsen, T	Luscinia svecica	Bluethroat			correlational	plumage throat pacthes	size	Body Condition	immunity	immune response	1		0.22745	0.218218
UNPAIRED	WOS:000233908500017	2005	2005	Parn, H and Lifjeld, JT and Amundsen, T	Luscinia svecica	Bluethroat			correlational	plumage throat pacthes	size	Body Condition	immunity	immune response	1		0.0968355	0.176777
UNPAIRED	WOS:000233908500017	2005	2005	Parn, H and Lifjeld, JT and Amundsen, T	Luscinia svecica	Bluethroat			correlational	plumage throat pacthes	size	Body Condition	immunity	immune response	1		0.062223	0.176777
UNPAIRED	WOS:000233908500017	2005	2005	Parn, H and Lifjeld, JT and Amundsen, T	Luscinia svecica	Bluethroat			correlational	plumage throat pacthes	size	Body Condition	immunity	immune response	1		0.131333	0.176777
UNPAIRED	WOS:000233908500017	2005	2005	Parn, H and Lifjeld, JT and Amundsen, T	Luscinia svecica	Bluethroat			correlational	plumage throat pacthes	size	Body Condition	body condition	mass corrected by size (residuals)	1		0.0952873	0.176777
UNPAIRED	WOS:000299446500009	2011	2011	Cabezas, Sonia and Tella, Jose L. and Carrete, Martina and Bortolotti, Gary R.	Molothrus rufoaxillaris	Screaming cowbird			correlational	plumage wing axilary patch	size	Body Condition	body size	body mass	-1		-0.0317486	0.19245
UNPAIRED	WOS:000299446500009	2011	2011	Cabezas, Sonia and Tella, Jose L. and Carrete, Martina and Bortolotti, Gary R.	Molothrus rufoaxillaris	Screaming cowbird			correlational	plumage wing axilary patch	size	Body Condition	body size	body mass	-1		-0.062637	0.27735
UNPAIRED	WOS:000299446500009	2011	2011	Cabezas, Sonia and Tella, Jose L. and Carrete, Martina and Bortolotti, Gary R.	Molothrus rufoaxillaris	Screaming cowbird			correlational	plumage wing axilary patch	size	Body Condition	body size	wing chord length	-1		-0.0230544	0.19245
UNPAIRED	WOS:000299446500009	2011	2011	Cabezas, Sonia and Tella, Jose L. and Carrete, Martina and Bortolotti, Gary R.	Molothrus rufoaxillaris	Screaming cowbird			correlational	plumage wing axilary patch	size	Body Condition	body size	wing chord length	-1		-0.0245873	0.27735
UNPAIRED	WOS:000347703700008	2015	2015	Surmacki, Adrian and Stepniewski, Janusz and Stepniewska, Malgorzata	Panurus biarmicus	Bearded reedling			correlational	lore	area	Body Condition	parasites	parasite infection	-1		-0.457659	0.204124
UNPAIRED	WOS:000251765600022	2008	2008	Doutrelant, C. and Gregoire, A. and Grnac, N. and Gomez, D. and Lambrechts, M. M. and Perret, P.	Cyanistes caeruleus	Blue tit			correlational	plumage collar (nape)	brightness	Fitness	reproductive success	clutch size	1		-0.308608	0.166667
UNPAIRED	WOS:000251765600022	2008	2008	Doutrelant, C. and Gregoire, A. and Grnac, N. and Gomez, D. and Lambrechts, M. M. and Perret, P.	Cyanistes caeruleus	Blue tit			experimental	plumage collar (nape)	brightness	Fitness	reproductive success	clutch size	1		0.317892	0.179605
UNPAIRED	WOS:000251765600022	2008	2008	Doutrelant, C. and Gregoire, A. and Grnac, N. and Gomez, D. and Lambrechts, M. M. and Perret, P.	Cyanistes caeruleus	Blue tit			correlational	plumage collar (nape)	chroma	Fitness	reproductive success	number of fledglings	1		0.338175	0.124035
UNPAIRED	WOS:000251765600022	2008	2008	Doutrelant, C. and Gregoire, A. and Grnac, N. and Gomez, D. and Lambrechts, M. M. and Perret, P.	Cyanistes caeruleus	Blue tit			correlational	plumage cap (crown)	brightness	Fitness	survival	survival	1		0.276259	0.116248
UNPAIRED	WOS:000251765600022	2008	2008	Doutrelant, C. and Gregoire, A. and Grnac, N. and Gomez, D. and Lambrechts, M. M. and Perret, P.	Cyanistes caeruleus	Blue tit			correlational	plumage cap (crown)	UV-blue colouration	Fitness	timing of breeding	laying date	-1		-0.241923	0.124035
UNPAIRED	WOS:000297849300010	2012	2012	Doutrelant, Claire and Gregoire, Arnaud and Midamegbe, Afiwa and Lambrechts, Marcel and Perret, Philippe	Cyanistes caeruleus	Blue tit			experimental	plumage cap	UV-blue hue	Fitness	reproductive success	clutch size	-1		-0.215788	0.223607
UNPAIRED	WOS:000297849300010	2012	2012	Doutrelant, Claire and Gregoire, Arnaud and Midamegbe, Afiwa and Lambrechts, Marcel and Perret, Philippe	Cyanistes caeruleus	Blue tit			experimental	plumage breast	chroma	Body Condition	body size	body mass	1		0.19753	0.208514
UNPAIRED	WOS:000323114200042	2013	2013	Pickett, Simon R. A. and Weber, Sam B. and McGraw, Kevin J. and Norris, Ken J. and Evans, Matthew R.	Parus major	Great tit			correlational	plumage breast stripe	blackness	Fitness	offspring quality or condition	nestling body mass	1		-0.143026	0.0221676
UNPAIRED	WOS:000323114200042	2013	2013	Pickett, Simon R. A. and Weber, Sam B. and McGraw, Kevin J. and Norris, Ken J. and Evans, Matthew R.	Parus major	Great tit			correlational	plumage ventral	brightness	Fitness	offspring quality or condition	nestling body mass	1		0.0853881	0.0221676
UNPAIRED	WOS:000317282200001	2013	2013	Remes, V; Matysiokova, B	Parus major	Great tit			correlational	plumage breast stripe	size	Fitness	offspring quality or condition	nestling body mass	1		0.311181	0.11547
UNPAIRED	WOS:000317282200001	2013	2013	Remes, V; Matysiokova, B	Parus major	Great tit			correlational	plumage breast	chroma	Fitness	offspring quality or condition	nestling body mass	1		-0.145134	0.11547
UNPAIRED	WOS:000317282200001	2013	2013	Remes, V; Matysiokova, B	Parus major	Great tit			correlational	plumage cheek	immaculateness	Fitness	offspring quality or condition	nestling body mass	1		-0.0550204	0.11547
UNPAIRED	WOS:000317282200001	2013	2013	Remes, V; Matysiokova, B	Parus major	Great tit			correlational	plumage breast stripe	size	Fitness	offspring quality or condition	nestling immune response	1		0.0389151	0.11547
UNPAIRED	WOS:000317282200001	2013	2013	Remes, V; Matysiokova, B	Parus major	Great tit			correlational	plumage breast	chroma	Fitness	offspring quality or condition	nestling immune response	1		-0.0550204	0.11547
UNPAIRED	WOS:000317282200001	2013	2013	Remes, V; Matysiokova, B	Parus major	Great tit			correlational	plumage cheek	immaculateness	Fitness	offspring quality or condition	nestling immune response	1		0.292265	0.11547
UNPAIRED	WOS:000317282200001	2013	2013	Remes, V; Matysiokova, B	Parus major	Great tit			correlational	plumage breast stripe	size	Fitness	offspring quality or condition	nestling tarsus length	1		-0.168866	0.11547
UNPAIRED	WOS:000317282200001	2013	2013	Remes, V; Matysiokova, B	Parus major	Great tit			correlational	plumage breast	chroma	Fitness	offspring quality or condition	nestling tarsus length	1		-0.218451	0.11547
UNPAIRED	WOS:000317282200001	2013	2013	Remes, V; Matysiokova, B	Parus major	Great tit			correlational	plumage cheek	immaculateness	Fitness	offspring quality or condition	nestling tarsus length	1		-0.0243062	0.11547
UNPAIRED	WOS:000317282200001	2013	2013	Remes, V; Matysiokova, B	Parus major	Great tit			correlational	plumage breast stripe	size	Fitness	parental quality	feeding rate	1		-0.146913	0.117851
UNPAIRED	WOS:000317282200001	2013	2013	Remes, V; Matysiokova, B	Parus major	Great tit			correlational	plumage breast	chroma	Fitness	parental quality	feeding rate	1		0.010072	0.117851
UNPAIRED	WOS:000317282200001	2013	2013	Remes, V; Matysiokova, B	Parus major	Great tit			correlational	plumage cheek	immaculateness	Fitness	parental quality	feeding rate	1		-0.0658904	0.117851
UNPAIRED	WOS:000317282200001	2013	2013	Remes, V; Matysiokova, B	Parus major	Great tit			correlational	plumage breast stripe	size	Fitness	reproductive success	nestling survival	1		-0.0136926	0.117041
UNPAIRED	WOS:000317282200001	2013	2013	Remes, V; Matysiokova, B	Parus major	Great tit			correlational	plumage breast	chroma	Fitness	reproductive success	nestling survival	1		-0.235002	0.117041
UNPAIRED	WOS:000317282200001	2013	2013	Remes, V; Matysiokova, B	Parus major	Great tit			correlational	plumage cheek	immaculateness	Fitness	reproductive success	nestling survival	1		-0.207669	0.117041
UNPAIRED	WOS:000233367300004	2005	2005	Mand, R and Tilgar, V and Moller, AP	Parus major	Great tit			correlational	plumage breast	hue	Fitness	reproductive success	number of fledglings	1		-0.345064	0.125
UNPAIRED	WOS:000233367300004	2005	2005	Mand, R and Tilgar, V and Moller, AP	Parus major	Great tit			correlational	plumage breast	hue	Fitness	reproductive success	number of fledglings	1		-0.0931907	0.174078
UNPAIRED	WOS:000233367300004	2005	2005	Mand, R and Tilgar, V and Moller, AP	Parus major	Great tit			correlational	plumage breast	hue	Body Condition	body size	body mass	1		0.222801	0.096225
UNPAIRED	WOS:000233367300004	2005	2005	Mand, R and Tilgar, V and Moller, AP	Parus major	Great tit			correlational	plumage breast	hue	Body Condition	body size	tarsus length	1		-0.0621526	0.0966736
UNPAIRED	WOS:000233367300004	2005	2005	Mand, R and Tilgar, V and Moller, AP	Parus major	Great tit			correlational	plumage breast	hue	Body Condition	body condition	mass corrected by size (covariate)	1		0.219485	0.0966736
UNPAIRED	WOS:000308279000018	2012	2012	Kilgas, Priit and Saag, Pauli and Maegi, Marko and Edenberg, Meeli and Tilgar, Vallo and Maend, Raivo	Parus major	Great tit			correlational	plumage breast	chroma	Body Condition	body condition	density of attached bacteria	-1		-1.15682	0.333333
UNPAIRED	WOS:000308279000018	2012	2012	Kilgas, Priit and Saag, Pauli and Maegi, Marko and Edenberg, Meeli and Tilgar, Vallo and Maend, Raivo	Parus major	Great tit			correlational	plumage breast	chroma	Body Condition	parasites	bacteria richness	-1		-0.403614	0.164399
UNPAIRED	WOS:000414212500001	2017	2017	Cantarero, Alejandro and Lopez-Arrabe, Jimena and Palma, Antonio and Moreno, Juan	Petronia petronia	Rock sparrow			correlational	plumage breast patch	size	Fitness	offspring quality or condition	nestling antioxidant defense	1		0.415733	0.110432
UNPAIRED	WOS:000414212500001	2017	2017	Cantarero, Alejandro and Lopez-Arrabe, Jimena and Palma, Antonio and Moreno, Juan	Petronia petronia	Rock sparrow			correlational	plumage breast patch	size	Fitness	offspring quality or condition	nestling antioxidant defense	1		-0.293893	0.164399
UNPAIRED	WOS:000414212500001	2017	2017	Cantarero, Alejandro and Lopez-Arrabe, Jimena and Palma, Antonio and Moreno, Juan	Petronia petronia	Rock sparrow			correlational	plumage breast patch	size	Fitness	offspring quality or condition	nestling antioxidant defense	1		0.243347	0.174078
UNPAIRED	WOS:000186338400010	2003	2003	Veit, AC and Jones, IL	Phaethon rubricauda	Redtailed Tropicbird			correlational	tail streamer	length	Fitness	offspring quality or condition	egg volume	1		0.002	0.141421
UNPAIRED	WOS:000186338400010	2003	2003	Veit, AC and Jones, IL	Phaethon rubricauda	Redtailed Tropicbird			correlational	tail streamer	length	Fitness	timing of breeding	laying date	-1		0.100335	0.0816497
UNPAIRED	WOS:000174502800003	2002	2002	Blanco, G and De la Puente, J	Pica pica	Black billed magpie			correlational	tail	tail past quality or tail condition	Body Condition	body condition	mass corrected by size (residuals)	1		-0.413434	0.218218
UNPAIRED	WOS:000174502800003	2002	2002	Blanco, G and De la Puente, J	Pica pica	Black billed magpie			correlational	tail	tail current quality and tail condition	Body Condition	parasites	parasite abundance	-1		-0.867301	0.333333
UNPAIRED	WOS:000392206100021	2017	2017	Bulluck, Lesley P. and Foster, Miran J. and Kay, Samantha and Cox, Donald E. and Viverette, Catherine and Huber, Sarah	Protonotaria citrea	Prothonotary warbler			correlational	plumage breast	chroma	Fitness	parental quality	feeding rate	-1		-0.59683	0.229416
UNPAIRED	WOS:000392206100021	2017	2017	Bulluck, Lesley P. and Foster, Miran J. and Kay, Samantha and Cox, Donald E. and Viverette, Catherine and Huber, Sarah	Protonotaria citrea	Prothonotary warbler			correlational	plumage breast	chroma	Fitness	parental quality	feeding rate	-1		-0.10296	0.235702
UNPAIRED	WOS:000392206100021	2017	2017	Bulluck, Lesley P. and Foster, Miran J. and Kay, Samantha and Cox, Donald E. and Viverette, Catherine and Huber, Sarah	Protonotaria citrea	Prothonotary warbler			correlational	plumage crown	chroma	Fitness	reproductive success	number of fledglings	-1		-0.236818	0.0798087
UNPAIRED	WOS:000324683000007	2013	2013	Osmond, Matthew M. and Reudink, Matthew W. and Germain, Ryan R. and Marra, Peter P. and Nocera, Joseph J. and Boag, Peter T. and Ratcliffe, Laurene M.	Setophaga ruticilla	American redstart			correlational	plumage tail	brightness	Fitness	parental quality	nest visits	1		-0.733751	0.353553
UNPAIRED	WOS:000324683000007	2013	2013	Osmond, Matthew M. and Reudink, Matthew W. and Germain, Ryan R. and Marra, Peter P. and Nocera, Joseph J. and Boag, Peter T. and Ratcliffe, Laurene M.	Setophaga ruticilla	American redstart			correlational	plumage tail	brightness	Fitness	reproductive success	fledging success	1		-0.64905	0.288675
UNPAIRED	WOS:000248962200003	2007	2007	Balenger, Susan L. and Johnson, L. Scott and Brubaker, Jessica L. and Ostlind, Emilene	Sialia currucoides	Mountain bluebird			correlational	plumage rump	colour intensity	Fitness	parental quality	nestling brooding rate	1		-0.223656	0.140028
UNPAIRED	WOS:000340612600004	2014	2014	Morrison, Ashley and Flood, Nancy J. and Reudink, Matthew W.	Sialia currucoides	Mountain bluebird			correlational	plumage tail	colouration	Fitness	parental quality	feeding rate	1		0.298566	0.27735
UNPAIRED	WOS:000340612600004	2014	2014	Morrison, Ashley and Flood, Nancy J. and Reudink, Matthew W.	Sialia currucoides	Mountain bluebird			correlational	plumage tail	colouration	Fitness	reproductive success	clutch size	1		0.337914	0.158114
UNPAIRED	WOS:000340612600004	2014	2014	Morrison, Ashley and Flood, Nancy J. and Reudink, Matthew W.	Sialia currucoides	Mountain bluebird			correlational	plumage tail	colouration	Fitness	reproductive success	clutch size	1		0.213171	0.267261
UNPAIRED	WOS:000340612600004	2014	2014	Morrison, Ashley and Flood, Nancy J. and Reudink, Matthew W.	Sialia currucoides	Mountain bluebird			correlational	plumage rump	colouration	Fitness	reproductive success	clutch size	1		0.326259	0.158114
UNPAIRED	WOS:000340612600004	2014	2014	Morrison, Ashley and Flood, Nancy J. and Reudink, Matthew W.	Sialia currucoides	Mountain bluebird			correlational	plumage tail	colouration	Body Condition	body size	tail length	1		0.342828	0.27735
UNPAIRED	WOS:000231658900017	2005	2005	Siefferman, L and Hill, GE	Sialia sialis	Eastern bluebird			correlational	plumage rump	colouration	Fitness	parental quality	feeding rate	1		0.0801713	0.078811
UNPAIRED	WOS:000231658900017	2005	2005	Siefferman, L and Hill, GE	Sialia sialis	Eastern bluebird			experimental	plumage breast	colouration	Body Condition	stress	nutritional stress manipulation	1		-0.0800927	0.333333
UNPAIRED	WOS:000231658900017	2005	2005	Siefferman, L and Hill, GE	Sialia sialis	Eastern bluebird			experimental	plumage rump	colouration	Body Condition	stress	nutritional stress manipulation	-1		0.196936	0.301511
UNPAIRED	WOS:000235628500009	2006	2006	Hanssen, SA and Folstad, I and Erikstad, KE	Somateria mollissima	Common eider			correlational	plumage wing patches (bands)	whiteness	Fitness	reproductive success	clutch size	1		0.794809	0.258199
UNPAIRED	WOS:000235628500009	2006	2006	Hanssen, SA and Folstad, I and Erikstad, KE	Somateria mollissima	Common eider			correlational	plumage wing patches (bands)	whiteness	Fitness	reproductive success	clutch size	1		0.523484	0.27735
UNPAIRED	WOS:000275432900023	2010	2010	Lehikoinen, Aleksi and Jaatinen, Kim and Ost, Markus	Somateria mollissima	Common eider			correlational	plumage wing bars	size	Fitness	reproductive success	hatching success	1		0.0453899	0.0696733
UNPAIRED	WOS:000235628500009	2006	2006	Hanssen, SA and Folstad, I and Erikstad, KE	Somateria mollissima	Common eider			correlational	plumage wing patches (bands)	whiteness	Body Condition	body size	body mass	-1		-0.923147	0.258199
UNPAIRED	WOS:000235628500009	2006	2006	Hanssen, SA and Folstad, I and Erikstad, KE	Somateria mollissima	Common eider			correlational	plumage wing patches (bands)	whiteness	Body Condition	body size	body mass	-1		-0.757974	0.27735
UNPAIRED	WOS:000257398700017	2008	2008	Hanssen, Sveinn A. and Hasselquist, Dennis and Folstad, Ivar and Erikstad, Kjell E.	Somateria mollissima	Common eider			experimental	plumage wing patches (bars)	whiteness	Body Condition	stress	parental investment with inmmune response manipulation in 2by2 factorial design	-1		-0.149748	0.19245
UNPAIRED	WOS:000257398700017	2008	2008	Hanssen, Sveinn A. and Hasselquist, Dennis and Folstad, Ivar and Erikstad, Kjell E.	Somateria mollissima	Common eider			experimental	plumage wing patches (bars)	whiteness	Body Condition	immunity	immune challenge	-1		-0.393881	0.19245
UNPAIRED	WOS:000235628500009	2006	2006	Hanssen, SA and Folstad, I and Erikstad, KE	Somateria mollissima	Common eider			correlational	plumage wing patches (bands)	whiteness	Body Condition	immunity	lymphocite level	1		0.682912	0.258199
UNPAIRED	WOS:000235628500009	2006	2006	Hanssen, SA and Folstad, I and Erikstad, KE	Somateria mollissima	Common eider			correlational	plumage wing patches (bands)	whiteness	Body Condition	immunity	lymphocite level	1		0.58745	0.27735
UNPAIRED	WOS:000275432900023	2010	2010	Lehikoinen, Aleksi and Jaatinen, Kim and Ost, Markus	Somateria mollissima	Common eider			correlational	plumage wing bars	size	Body Condition	body condition	mass corrected by size (residuals)	1		-0.0243709	0.0696733
UNPAIRED	WOS:000312990100010	2013	2013	Bentz, Alexandra B. and Siefferman, Lynn	Tachycineta bicolor	Tree swallow			correlational	plumage rump	brightness	Fitness	offspring quality or condition	egg mass	-1		0.266108	0.25
UNPAIRED	WOS:000312990100010	2013	2013	Bentz, Alexandra B. and Siefferman, Lynn	Tachycineta bicolor	Tree swallow			correlational	plumage rump	colouration	Fitness	offspring quality or condition	egg mass	1		0.223656	0.174078
UNPAIRED	WOS:000312990100010	2013	2013	Bentz, Alexandra B. and Siefferman, Lynn	Tachycineta bicolor	Tree swallow			correlational	plumage rump	brightness	Fitness	offspring quality or condition	mass corrected by size (residuals, nestlings)	-1		-0.725005	0.267261
UNPAIRED	WOS:000312990100010	2013	2013	Bentz, Alexandra B. and Siefferman, Lynn	Tachycineta bicolor	Tree swallow			correlational	plumage rump	colouration	Fitness	offspring quality or condition	mass corrected by size (residuals, nestlings)	1		-0.420082	0.182574
UNPAIRED	WOS:000312990100010	2013	2013	Bentz, Alexandra B. and Siefferman, Lynn	Tachycineta bicolor	Tree swallow			correlational	plumage rump	colouration	Body Condition	body condition	hematocrite	1		-0.601002	0.242536
UNPAIRED	WOS:000312990100010	2013	2013	Bentz, Alexandra B. and Siefferman, Lynn	Tachycineta bicolor	Tree swallow			correlational	plumage rump	colouration	Body Condition	immunity	immune response	1		-0.665636	0.316228
UNPAIRED	WOS:000257912700002	2008	2008	Bitton, Pierre-Paul and Dawson, Russell D. and Ochs, Courtney L.	Tachycineta bicolor	Tree swallow			correlational	plumage rump	brightness	Fitness	offspring quality or condition	egg mass	1		0.266108	0.242536
UNPAIRED	WOS:000257912700002	2008	2008	Bitton, Pierre-Paul and Dawson, Russell D. and Ochs, Courtney L.	Tachycineta bicolor	Tree swallow			correlational	plumage rump	brightness	Fitness	reproductive success	clutch size	1		-0.00205061	0.142857
UNPAIRED	WOS:000257912700002	2008	2008	Bitton, Pierre-Paul and Dawson, Russell D. and Ochs, Courtney L.	Tachycineta bicolor	Tree swallow			correlational	plumage rump	hue	Fitness	reproductive success	clutch size	1		-0.11374	0.142857
UNPAIRED	WOS:000364791100020	2015	2015	Beck, Michelle L. and Hopkins, William A. and Hawley, Dana M.	Tachycineta bicolor	Tree swallow			correlational	plumage breast	brightness	Fitness	offspring quality or condition	immune response in nestlings	1		0.358572	0.171499
UNPAIRED	WOS:000364791100020	2015	2015	Beck, Michelle L. and Hopkins, William A. and Hawley, Dana M.	Tachycineta bicolor	Tree swallow			correlational	plumage breast	brightness	Body Condition	immunity	immune response	1		0.552637	0.301511
UNPAIRED	WOS:000458156900001	2019	2019	Griebel, Ilsa A. and Dawson, Russell D.	Tachycineta bicolor	Tree swallow			correlational	plumage rump	brightness	Fitness	reproductive success	Nestling survival	1		-0.112719	0.0495074
UNPAIRED	WOS:000458156900001	2019	2019	Griebel, Ilsa A. and Dawson, Russell D.	Tachycineta bicolor	Tree swallow			correlational	plumage rump	UV chroma	Fitness	reproductive success	Nestling survival	1		-0.124963	0.0495074
UNPAIRED	WOS:000306366400052	2012	2012	Simons, Mirre J. P. and Briga, Michael and Koetsier, Egbert and Folkertsma, Remco and Wubs, Matthias D. and Dijkstra, Cor and Verhulst, Simon	Taeniopygia guttata	Zebra finch			correlational	bill	hue	Fitness	reproductive success	brood production (broods produced that resulted in hatchlings)	1		0.304034	0.176777
UNPAIRED	WOS:000306366400052	2012	2012	Simons, Mirre J. P. and Briga, Michael and Koetsier, Egbert and Folkertsma, Remco and Wubs, Matthias D. and Dijkstra, Cor and Verhulst, Simon	Taeniopygia guttata	Zebra finch			correlational	bill	hue	Fitness	reproductive success	number of fledglings	1		0.298566	0.176777
UNPAIRED	WOS:000306366400052	2012	2012	Simons, Mirre J. P. and Briga, Michael and Koetsier, Egbert and Folkertsma, Remco and Wubs, Matthias D. and Dijkstra, Cor and Verhulst, Simon	Taeniopygia guttata	Zebra finch			correlational	bill	hue	Fitness	survival	survival	1		0.189082	0.124035
UNPAIRED	WOS:000087149700014	2000	2000	Roulin, A and Jungi, TW and Pfister, H and Dijkstra, C	Tyto alba	Barn owl			correlational	plumage spots	coverage	Body Condition	body condition	mass corrected by size (residuals)	1		0.192337	0.169031
UNPAIRED	WOS:000169755900007	2001a	2001	Roulin, A and Dijkstra, C and Riols, C and Ducrest, AL	Tyto alba	Barn owl			correlational	plumage ventral areas	colour	Fitness	timing of breeding	hatching date	1		-0.19636	0.0743294
UNPAIRED	WOS:000223266500017	2004	2004	Roulin, A	Tyto alba	Barn owl			correlational	plumage ventral spots	size	Fitness	offspring quality or condition	immune response in nestlings	1		0.503925	0.169031
UNPAIRED	WOS:000223266500017	2004	2004	Roulin, A	Tyto alba	Barn owl			correlational	plumage ventral spots	size	Fitness	offspring quality or condition	parasite resistance in nestlings	-1		-0.530828	0.188982
UNPAIRED	WOS:000223266500017	2004	2004	Roulin, A	Tyto alba	Barn owl			correlational	plumage ventral spots	size	Fitness	offspring quality or condition	wing fluctuating asymmetry in nestlings	-1		-0.314639	0.158114
UNPAIRED	WOS:000263782800006	2009	2009	Roulin, Alexandre	Tyto alba	Barn owl			correlational	plumage spots	diameter	Body Condition	body size	body mass	1		0.171667	0.0610847
UNPAIRED	WOS:000263782800006	2009	2009	Roulin, Alexandre	Tyto alba	Barn owl			correlational	plumage spots	diameter	Body Condition	body size	body mass	1		0.0600722	0.0572598
UNPAIRED	WOS:000280962200006	2010	2010	Dreiss, Amelie and Henry, Isabelle and Ruppli, Charlene and Almasi, Bettina and Roulin, Alexandre	Tyto alba	Barn owl			experimental	plumage spots	diameter	Fitness	offspring quality or condition	nestling body mass	-1		-0.193442	0.0766965
UNPAIRED	WOS:000302485200003	2012	2012	van den Brink, Valentijn and Dolivo, Vassilissa and Falourd, Xavier and Dreiss, Amelie N. and Roulin, Alexandre	Tyto alba	Barn owl			correlational	plumage spots	size	Fitness	offspring quality or condition	nestling antipredator behaviour	1		1.12936	0.316228
UNPAIRED	WOS:000395510000012	2017	2017	Grunst, Andrea S. and Grunst, Melissa L. and Rathbun, Nathan A. and Hubbard, Joanna K. and Safran, Rebecca J. and Gonser, Rusty A. and Tuttle, Elaina M.	Zonotrichia albicollis	White throated sparrow			correlational	plumage crown stripes	morph (white)	Fitness	survival	survival	1		0.0986504	0.118678
UNPAIRED	WOS:000395510000012	2017	2017	Grunst, Andrea S. and Grunst, Melissa L. and Rathbun, Nathan A. and Hubbard, Joanna K. and Safran, Rebecca J. and Gonser, Rusty A. and Tuttle, Elaina M.	Zonotrichia albicollis	White throated sparrow			correlational	plumage crown stripes	saturation	Fitness	survival	survival	1		-0.0232474	0.118678
UNPAIRED	WOS:000361007700006	2015	2015	van Dijk, Rene E. and Robles, Raquel and Groothuis, Ton G. G. and de Vries, Bonnie and Eising, Corine M.	Apalis thoracica	Bar throated apalis			correlational	plumage breast band	size	Fitness	parental quality	male provisioning to the incubating female		1			1.44947	0.333333
UNPAIRED	male2	2004	2004	Jawor, JM, Breitwisch, R	Cardinalis cardinalis	Northern cardinal			correlational	plumage breast	color	Fitness	parental quality	feeding rate		1			-0.532024	0.235702
UNPAIRED	male2	2004	2004	Jawor, JM, Breitwisch, R	Cardinalis cardinalis	Northern cardinal			correlational	plumage face mask	size	Fitness	reproductive success	reproductive success (number of fledged nests)		1			-0.529206	0.196116
UNPAIRED	male2	2004	2004	Jawor, JM, Breitwisch, R	Cardinalis cardinalis	Northern cardinal			correlational	plumage breast	color	Body Condition	body size	body size		1			0.294025	0.109109
UNPAIRED	male2	2004	2004	Jawor, JM, Breitwisch, R	Cardinalis cardinalis	Northern cardinal			correlational	bill	color	Body Condition	body condition	mass corrected by size (residuals)		1			0.457009	0.110432
UNPAIRED	WOS:000305396400004	2012	2012	Kelly, Ryan J. and Murphy, Troy G. and Tarvin, Keith A. and Burness, Gary	Spinus tristis	American goldfinch			correlational	bill	saturation	Body Condition	body condition	oxygen consumption oxygen as an index of RMR		1			-0.14317	0.218218
UNPAIRED	WOS:000305396400004	2012	2012	Kelly, Ryan J. and Murphy, Troy G. and Tarvin, Keith A. and Burness, Gary	Spinus tristis	American goldfinch			correlational	plumage throat	luminence	Body Condition	body condition	oxygen consumption oxygen as an index of RMR		1			0.30886	0.223607
UNPAIRED	WOS:000305396400004	2012	2012	Kelly, Ryan J. and Murphy, Troy G. and Tarvin, Keith A. and Burness, Gary	Spinus tristis	American goldfinch			correlational	bill	luminence	Body Condition	immunity	immunoglobulins		1			0.0736227	0.218218
UNPAIRED	WOS:000305396400004	2012	2012	Kelly, Ryan J. and Murphy, Troy G. and Tarvin, Keith A. and Burness, Gary	Spinus tristis	American goldfinch			correlational	bill	hue	Body Condition	immunity	natural antibodies		1			-0.238523	0.25
UNPAIRED	WOS:000305396400004	2012	2012	Kelly, Ryan J. and Murphy, Troy G. and Tarvin, Keith A. and Burness, Gary	Spinus tristis	American goldfinch			correlational	bill	saturation	Body Condition	stress	heterophil:lymphocyte ratio used as an indicator of stress		-1			-0.437596	0.204124
UNPAIRED	WOS:000305396400004	2012	2012	Kelly, Ryan J. and Murphy, Troy G. and Tarvin, Keith A. and Burness, Gary	Spinus tristis	American goldfinch			correlational	plumage throat	saturation	Body Condition	stress	heterophil:lymphocyte ratio used as an indicator of stress		-1			-0.410739	0.204124
UNPAIRED	male1	2006	2006	Rosen, RF, Tarvin, KA	Spinus tristis	American goldfinch			correlational	bill colour	brightness and hue	Body Condition	body condition	mass corrected by size (residuals)		1			-0.0776151	0.188982
UNPAIRED	male1	2006	2006	Rosen, RF, Tarvin, KA	Spinus tristis	American goldfinch			correlational	bill colour	saturation	Body Condition	body condition	mass corrected by size (residuals)		1			0.240133	0.188982
UNPAIRED	male1	2006	2006	Rosen, RF, Tarvin, KA	Spinus tristis	American goldfinch			correlational	plumage breast	saturation and hue	Body Condition	body condition	mass corrected by size (residuals)		1			0.118878	0.185695
UNPAIRED	male1	2006	2006	Rosen, RF, Tarvin, KA	Spinus tristis	American goldfinch			correlational	plumage breast	brightness	Body Condition	body condition	mass corrected by size (residuals)		1			-0.152837	0.185695
UNPAIRED	male1	2006	2006	Rosen, RF, Tarvin, KA	Spinus tristis	American goldfinch			correlational	plumage back	saturation and hue	Body Condition	body condition	mass corrected by size (residuals)		1			0.220874	0.188982
UNPAIRED	male1	2006	2006	Rosen, RF, Tarvin, KA	Spinus tristis	American goldfinch			correlational	plumage cap	symmetry and size	Body Condition	body condition	mass corrected by size (residuals)		1			0.0896824	0.218218
UNPAIRED	WOS:000336484600010	2014	2014	Grunst, Andrea S. and Rotenberry, John T. and Grunst, Melissa L.	Setophaga petechia	Yellow warbler			correlational	plumage breast	melanin coverage	Body Condition	body condition	feather quality or condition		1			0.373415	0.144338
UNPAIRED	WOS:000336484600010	2014	2014	Grunst, Andrea S. and Rotenberry, John T. and Grunst, Melissa L.	Setophaga petechia	Yellow warbler			correlational	plumage breast	melanin coverage	Body Condition	body condition	feather quality or condition		1			0.139192	0.223607
UNPAIRED	WOS:000336484600010	2014	2014	Grunst, Andrea S. and Rotenberry, John T. and Grunst, Melissa L.	Setophaga petechia	Yellow warbler			correlational	plumage breast	melanin saturation	Body Condition	body condition	feather quality or condition		1			0.237726	0.0928477
UNPAIRED	WOS:000266864000002	2009	2009	McGraw, Kevin J. and Massaro, Melanie and Rivers, Trevor J. and Mattern, Thomas	Eudyptes robustus	Snares penguin			correlational	plumage crest	hue	Body Condition	body size	body mass		1			0.708921	0.333333
UNPAIRED	WOS:000266864000002	2009	2009	McGraw, Kevin J. and Massaro, Melanie and Rivers, Trevor J. and Mattern, Thomas	Eudyptes robustus	Snares penguin			correlational	plumage crest	hue	Body Condition	body size	body mass		1			1.15682	0.333333
UNPAIRED	WOS:000244750600008	2007	2007	Murphy, Troy G.	Eumomota superciliosa	Turquoise browed motmot			correlational	plumage tail (wire)	length	Fitness	reproductive success	clutch size		1			0.357619	0.125988
UNPAIRED	WOS:000244750600008	2007	2007	Murphy, Troy G.	Eumomota superciliosa	Turquoise browed motmot			correlational	plumage tail (wire)	length	Fitness	reproductive success	hatching success		1			0.430579	0.144338
UNPAIRED	WOS:000244750600008	2007	2007	Murphy, Troy G.	Eumomota superciliosa	Turquoise browed motmot			correlational	plumage tail (wire)	length	Fitness	reproductive success	mating success		1			0.493998	0.213201
UNPAIRED	WOS:000371069800030	2016	2016	Lopez-Idiaquez, David and Vergara, Pablo and Antonio Fargallo, Juan and Martinez-Padilla, Jesus	Falco tinnunculus	Common kestrel			correlational	plumage dorsal spots	size	Fitness	reproductive success	number of fledglings		1			0.203812	0.0845154
UNPAIRED	WOS:000371069800030	2016	2016	Lopez-Idiaquez, David and Vergara, Pablo and Antonio Fargallo, Juan and Martinez-Padilla, Jesus	Falco tinnunculus	Common kestrel			correlational	plumage dorsal spots	size	Body Condition	environment	prey abundance		1			0.371246	0.0845154
UNPAIRED	WOS:000287753000008	2011	2011	Parejo, Deseada and Silva, Nadia and Danchin, Etienne and Aviles, Jesus M.	Falco tinnunculus	Common kestrel			correlational	plumage head	brightness and UV chroma	Body Condition	immunity	natural antibodies		1			0.399191	0.185695
UNPAIRED	WOS:000328127700009	2013	2013	Laczi, Miklos and Hegyi, Gergely and Herenyi, Marton and Kiss, Dorottya and Marko, Gabor and Nagy, Gergely and Rosivall, Balazs and Szoellosi, Eszter and Toeroek, Janos	Ficedula albicollis	Collared flycatcher			correlational	plumage composite (forehead, crown and wing patch)	UV chroma	Fitness	reproductive success	clutch size		1			0.223656	0.113961
UNPAIRED	WOS:000328127700009	2013	2013	Laczi, Miklos and Hegyi, Gergely and Herenyi, Marton and Kiss, Dorottya and Marko, Gabor and Nagy, Gergely and Rosivall, Balazs and Szoellosi, Eszter and Toeroek, Janos	Ficedula albicollis	Collared flycatcher			correlational	plumage composite (wing coverts and crown)	UV chroma	Fitness	timing of breeding	laying date		-1			-0.192337	0.113961
UNPAIRED	WOS:000328127700009	2013	2013	Laczi, Miklos and Hegyi, Gergely and Herenyi, Marton and Kiss, Dorottya and Marko, Gabor and Nagy, Gergely and Rosivall, Balazs and Szoellosi, Eszter and Toeroek, Janos	Ficedula albicollis	Collared flycatcher			correlational	plumage composite (mainly wing coverts)	brightness	Body Condition	body condition	mass corrected by size (residuals)		-1			-0.298566	0.113961
UNPAIRED	WOS:000388349800010	2016	2016	Kotel, Dora and Laczi, Miklos and Torok, Janos and Hegyi, Gergely	Ficedula albicollis	Collared flycatcher			correlational	plumage forehead patch	size	Fitness	parental quality	feeding rate (feeding the incubating female)		1			-0.0320789	0.171499
UNPAIRED	WOS:000388349800010	2016	2016	Kotel, Dora and Laczi, Miklos and Torok, Janos and Hegyi, Gergely	Ficedula albicollis	Collared flycatcher			correlational	plumage wing patch	size	Fitness	parental quality	feeding rate (feeding the incubating female)		1			-0.343587	0.171499
UNPAIRED	WOS:000388349800010	2016	2016	Kotel, Dora and Laczi, Miklos and Torok, Janos and Hegyi, Gergely	Ficedula albicollis	Collared flycatcher			correlational	plumage composite	brightness	Fitness	parental quality	feeding rate (feeding the incubating female)		1			-0.0622683	0.171499
UNPAIRED	WOS:000388349800010	2016	2016	Kotel, Dora and Laczi, Miklos and Torok, Janos and Hegyi, Gergely	Ficedula albicollis	Collared flycatcher			correlational	plumage composite	UV chroma	Fitness	parental quality	feeding rate (feeding the incubating female)		1			-0.224906	0.171499
UNPAIRED	WOS:000388349800010	2016	2016	Kotel, Dora and Laczi, Miklos and Torok, Janos and Hegyi, Gergely	Ficedula albicollis	Collared flycatcher			correlational	plumage composite	brightness	Fitness	parental quality	feeding rate (feeding the incubating female)		-1			0.186625	0.171499
UNPAIRED	male4	2003	2003	Torok, J, Hegyi, G, Garamszegi, LZ	Ficedula albicollis	Collared flycatcher			correlational	plumage wing patch	size	Body Condition	body condition	mass corrected by size (covariate)		1			0.0305619	0.0583212
UNPAIRED	male4	2003	2003	Torok, J, Hegyi, G, Garamszegi, LZ	Ficedula albicollis	Collared flycatcher			correlational	plumage wing patch	size	Body Condition	body condition	mass corrected by size (covariate)		1			0.25672	0.119523
UNPAIRED	male13	2011	2011	Canal, D, Potti, J, Dávila, JA	Ficedula hypoleuca	Pied flycatcher			correlational	plumage forehead patch	size	Fitness	reproductive success	reproductive success (paternity loss)		-1			-0.131799	0.102062
UNPAIRED	male13	2011	2011	Canal, D, Potti, J, Dávila, JA	Ficedula hypoleuca	Pied flycatcher			correlational	plumage forehead patch	size	Fitness	reproductive success	reproductive success (paternity gain)		1			0.12782	0.102062
UNPAIRED	male12	1991	1991	Potti, J, Montalvo, S	Ficedula hypoleuca	Pied flycatcher			correlational	plumage forehead patch	size	Fitness	timing of breeding	arrival date		-1			0.120581	0.174078
UNPAIRED	male12	1991	1991	Potti, J, Montalvo, S	Ficedula hypoleuca	Pied flycatcher			correlational	plumage forehead patch	size	Fitness	timing of breeding	arrival date		-1			-0.213171	0.125
UNPAIRED	male12	1991	1991	Potti, J, Montalvo, S	Ficedula hypoleuca	Pied flycatcher			correlational	plumage forehead patch	size	Fitness	timing of breeding	laying date		-1			0.181983	0.164399
UNPAIRED	male12	1991	1991	Potti, J, Montalvo, S	Ficedula hypoleuca	Pied flycatcher			correlational	plumage forehead patch	size	Fitness	timing of breeding	laying date		-1			0.0200027	0.133631
UNPAIRED	male12	1991	1991	Potti, J, Montalvo, S	Ficedula hypoleuca	Pied flycatcher			correlational	plumage forehead patch	size	Fitness	timing of breeding	laying date		-1			-0.234189	0.125
UNPAIRED	male17	1996	1996	Potti, J, Merino, S	Ficedula hypoleuca	Pied flycatcher			correlational	plumage forehead patch	size	Body Condition	parasites	trypanosome infection		-1			0.110447	0.164399
UNPAIRED	male15	2010	2010	Freeman-Gallant, CR, Taff, CC, Morin, DF, Dunn, PO, Whittingham, LA, Tsang, SM	Geothlypis trichas	Common yellowthroat			correlational	plumage bib	UV brightness	Fitness	reproductive success	extra-pair mating success		1			-0.30952	0.164399
UNPAIRED	male15	2010	2010	Freeman-Gallant, CR, Taff, CC, Morin, DF, Dunn, PO, Whittingham, LA, Tsang, SM	Geothlypis trichas	Common yellowthroat			correlational	plumage bib	chroma	Fitness	reproductive success	extra-pair mating success		1			-0.344695	0.164399
UNPAIRED	male15	2010	2010	Freeman-Gallant, CR, Taff, CC, Morin, DF, Dunn, PO, Whittingham, LA, Tsang, SM	Geothlypis trichas	Common yellowthroat			correlational	plumage bib	size	Fitness	reproductive success	mating success		1			0.408618	0.160128
UNPAIRED	male15	2010	2010	Freeman-Gallant, CR, Taff, CC, Morin, DF, Dunn, PO, Whittingham, LA, Tsang, SM	Geothlypis trichas	Common yellowthroat			correlational	plumage bib	UV brightness	Fitness	reproductive success	mating success		1			0.339831	0.160128
UNPAIRED	male15	2010	2010	Freeman-Gallant, CR, Taff, CC, Morin, DF, Dunn, PO, Whittingham, LA, Tsang, SM	Geothlypis trichas	Common yellowthroat			correlational	plumage bib	chroma	Fitness	reproductive success	mating success		1			0.359794	0.160128
UNPAIRED	male16	2010	2010	Dunn, PO, Garvin, JC, Whittingham, LA, Freeman?Gallant, CR, Hasselquist, D	Geothlypis trichas	Common yellowthroat			correlational	plumage mask face	size	Fitness	survival	apparent survival (return)		-1			-0.0998341	0.111803
UNPAIRED	male16	2010	2010	Dunn, PO, Garvin, JC, Whittingham, LA, Freeman?Gallant, CR, Hasselquist, D	Geothlypis trichas	Common yellowthroat			correlational	plumage bib	size	Fitness	survival	apparent survival (return)		-1			-0.209767	0.112509
UNPAIRED	male16	2010	2010	Dunn, PO, Garvin, JC, Whittingham, LA, Freeman?Gallant, CR, Hasselquist, D	Geothlypis trichas	Common yellowthroat			correlational	plumage bib	brightness	Fitness	survival	apparent survival (return)		-1			-0.117126	0.112509
UNPAIRED	male16	2010	2010	Dunn, PO, Garvin, JC, Whittingham, LA, Freeman?Gallant, CR, Hasselquist, D	Geothlypis trichas	Common yellowthroat			correlational	plumage bib	saturation	Fitness	survival	apparent survival (return)		-1			0.135981	0.112509
UNPAIRED	male15	2010	2010	Freeman-Gallant, CR, Taff, CC, Morin, DF, Dunn, PO, Whittingham, LA, Tsang, SM	Geothlypis trichas	Common yellowthroat			correlational	plumage mask face	size	Body Condition	body size	body mass		1			0.202733	0.158114
UNPAIRED	male15	2010	2010	Freeman-Gallant, CR, Taff, CC, Morin, DF, Dunn, PO, Whittingham, LA, Tsang, SM	Geothlypis trichas	Common yellowthroat			correlational	plumage bib	size	Body Condition	body size	body mass		1			0.181983	0.158114
UNPAIRED	male15	2010	2010	Freeman-Gallant, CR, Taff, CC, Morin, DF, Dunn, PO, Whittingham, LA, Tsang, SM	Geothlypis trichas	Common yellowthroat			correlational	plumage bib	brightness	Body Condition	body size	body mass		1			0	0.160128
UNPAIRED	male15	2010	2010	Freeman-Gallant, CR, Taff, CC, Morin, DF, Dunn, PO, Whittingham, LA, Tsang, SM	Geothlypis trichas	Common yellowthroat			correlational	plumage bib	chroma	Body Condition	body size	body mass		1			-0.0400214	0.160128
UNPAIRED	male15	2010	2010	Freeman-Gallant, CR, Taff, CC, Morin, DF, Dunn, PO, Whittingham, LA, Tsang, SM	Geothlypis trichas	Common yellowthroat			correlational	plumage bib	UV brightness	Body Condition	body size	body mass		1			0.354093	0.160128
UNPAIRED	male15	2010	2010	Freeman-Gallant, CR, Taff, CC, Morin, DF, Dunn, PO, Whittingham, LA, Tsang, SM	Geothlypis trichas	Common yellowthroat			correlational	plumage mask face	size	Body Condition	body size	body mass		1			0.266108	0.166667
UNPAIRED	male15	2010	2010	Freeman-Gallant, CR, Taff, CC, Morin, DF, Dunn, PO, Whittingham, LA, Tsang, SM	Geothlypis trichas	Common yellowthroat			correlational	plumage bib	size	Body Condition	body size	body mass		1			-0.13074	0.166667
UNPAIRED	male15	2010	2010	Freeman-Gallant, CR, Taff, CC, Morin, DF, Dunn, PO, Whittingham, LA, Tsang, SM	Geothlypis trichas	Common yellowthroat			correlational	plumage bib	brightness	Body Condition	body size	body mass		1			-0.0701147	0.164399
UNPAIRED	male15	2010	2010	Freeman-Gallant, CR, Taff, CC, Morin, DF, Dunn, PO, Whittingham, LA, Tsang, SM	Geothlypis trichas	Common yellowthroat			correlational	plumage bib	chroma	Body Condition	body size	body mass		1			0.459897	0.164399
UNPAIRED	male15	2010	2010	Freeman-Gallant, CR, Taff, CC, Morin, DF, Dunn, PO, Whittingham, LA, Tsang, SM	Geothlypis trichas	Common yellowthroat			correlational	plumage bib	UV brightness	Body Condition	body size	body mass		1			-0.51007	0.166667
UNPAIRED	male14	2011	2011	Freeman-Gallant, CR, Amidon J, Berdy, B, Wein, S, Taff, CC, Haussmann, MF	Geothlypis trichas	Common yellowthroat			correlational	plumage bib	size	Body Condition	stress	oxidative stress		-1			0.413302	0.182574
UNPAIRED	male14	2011	2011	Freeman-Gallant, CR, Amidon J, Berdy, B, Wein, S, Taff, CC, Haussmann, MF	Geothlypis trichas	Common yellowthroat			correlational	plumage bib	chroma	Body Condition	stress	oxidative stress		-1			-0.391816	0.182574
UNPAIRED	male14	2011	2011	Freeman-Gallant, CR, Amidon J, Berdy, B, Wein, S, Taff, CC, Haussmann, MF	Geothlypis trichas	Common yellowthroat			correlational	plumage bib	brightness	Body Condition	stress	oxidative stress		-1			-0.608799	0.223607
UNPAIRED	male14	2011	2011	Freeman-Gallant, CR, Amidon J, Berdy, B, Wein, S, Taff, CC, Haussmann, MF	Geothlypis trichas	Common yellowthroat			correlational	plumage bib	brightness	Body Condition	stress	oxidative stress		-1			-0.653198	0.258199
UNPAIRED	male16	2010	2010	Dunn, PO, Garvin, JC, Whittingham, LA, Freeman?Gallant, CR, Hasselquist, D	Geothlypis trichas	Common yellowthroat			correlational	plumage mask face	size	Body Condition	body size	body mass		1			0.208285	0.0821995
UNPAIRED	male16	2010	2010	Dunn, PO, Garvin, JC, Whittingham, LA, Freeman?Gallant, CR, Hasselquist, D	Geothlypis trichas	Common yellowthroat			correlational	plumage bib	size	Body Condition	body size	body mass		1			0.140589	0.101535
UNPAIRED	male16	2010	2010	Dunn, PO, Garvin, JC, Whittingham, LA, Freeman?Gallant, CR, Hasselquist, D	Geothlypis trichas	Common yellowthroat			correlational	plumage bib	saturation	Body Condition	body size	body mass		1			-0.0188097	0.123091
UNPAIRED	male16	2010	2010	Dunn, PO, Garvin, JC, Whittingham, LA, Freeman?Gallant, CR, Hasselquist, D	Geothlypis trichas	Common yellowthroat			correlational	plumage mask face	size	Body Condition	immunity	immunoglobulins		1			0.273585	0.0821995
UNPAIRED	male16	2010	2010	Dunn, PO, Garvin, JC, Whittingham, LA, Freeman?Gallant, CR, Hasselquist, D	Geothlypis trichas	Common yellowthroat			correlational	plumage bib	size	Body Condition	immunity	immunoglobulins		1			0.0128692	0.101535
UNPAIRED	male16	2010	2010	Dunn, PO, Garvin, JC, Whittingham, LA, Freeman?Gallant, CR, Hasselquist, D	Geothlypis trichas	Common yellowthroat			correlational	plumage bib	saturation	Body Condition	immunity	immunoglobulins		1			0.0395182	0.123091
UNPAIRED	male18	2014	2014	Hasegawa, M, Arai, E, Watanabe, M, Nakamura, M	Hirundo rustica	Barn swallow			correlational	plumage throat patch	saturation	Fitness	parental quality	feeding rate		-1			0.53582	0.196116
UNPAIRED	male18	2014	2014	Hasegawa, M, Arai, E, Watanabe, M, Nakamura, M	Hirundo rustica	Barn swallow			correlational	plumage throat patch	size	Fitness	parental quality	feeding rate		1			0.0294841	0.196116
UNPAIRED	male18	2014	2014	Hasegawa, M, Arai, E, Watanabe, M, Nakamura, M	Hirundo rustica	Barn swallow			correlational	plumage tail	length	Fitness	parental quality	feeding rate		1			0.348596	0.196116
UNPAIRED	male18	2014	2014	Hasegawa, M, Arai, E, Watanabe, M, Nakamura, M	Hirundo rustica	Barn swallow			correlational	plumage tail spots	size	Fitness	parental quality	feeding rate		1			-0.0833094	0.196116
UNPAIRED	male18	2014	2014	Hasegawa, M, Arai, E, Watanabe, M, Nakamura, M	Hirundo rustica	Barn swallow			correlational	plumage throat patch	saturation	Body Condition	environment	territory quality		-1			-1.00138	0.377964
UNPAIRED	WOS:000221556500012	2004	2004	Safran, RJ and McGraw, KJ	Hirundo rustica	Barn swallow			correlational	plumage vent	colour	Fitness	reproductive success	number of fledglings		-1			-0.378073	0.196116
UNPAIRED	WOS:000221556500012	2004	2004	Safran, RJ and McGraw, KJ	Hirundo rustica	Barn swallow			correlational	plumage throat	colour	Fitness	timing of breeding	laying date		1			0.416949	0.196116
UNPAIRED	WOS:000184534600001	2003	2003	Cuervo, JJ and Moller, AP and de Lope, F	Hirundo rustica	Barn swallow			correlational	plumage tail	length	Fitness	reproductive success	number of nestlings		1			-0.382642	0.213201
UNPAIRED	WOS:000296295000036	2011	2011	Vortman, Yoni and Lotem, Arnon and Dor, Roi and Lovette, Irby J. and Safran, Rebecca J.	Hirundo rustica	Barn swallow			correlational	plumage ventral	colour	Fitness	reproductive success	number of nestlings		1			0.593475	0.188982
UNPAIRED	WOS:000296295000036	2011	2011	Vortman, Yoni and Lotem, Arnon and Dor, Roi and Lovette, Irby J. and Safran, Rebecca J.	Hirundo rustica	Barn swallow			correlational	plumage tail streamer	length	Fitness	reproductive success	number of nestlings		1			0.25402	0.188982
UNPAIRED	WOS:000296295000036	2011	2011	Vortman, Yoni and Lotem, Arnon and Dor, Roi and Lovette, Irby J. and Safran, Rebecca J.	Hirundo rustica	Barn swallow			correlational	plumage tail streamer	length	Fitness	reproductive success	number of nestlings		1			0.867301	0.316228
UNPAIRED	WOS:000296295000036	2011	2011	Vortman, Yoni and Lotem, Arnon and Dor, Roi and Lovette, Irby J. and Safran, Rebecca J.	Hirundo rustica	Barn swallow			correlational	plumage ventral	colour	Fitness	reproductive success	number of nestlings		1			0.741416	0.333333
UNPAIRED	male3	2004	2004	Mougeot, F, Irvine JR, seivwright, L, Redpath, SM, Piertney, S	Lagopus lagopus	Red grouse			correlational	comb	size	Body Condition	body condition	pectoral muscular index		1			0.371764	0.140028
UNPAIRED	male3	2004	2004	Mougeot, F, Irvine JR, seivwright, L, Redpath, SM, Piertney, S	Lagopus lagopus	Red grouse			correlational	comb	size	Body Condition	immunity	immunity		1			0.726526	0.179605
UNPAIRED	male3	2004	2004	Mougeot, F, Irvine JR, seivwright, L, Redpath, SM, Piertney, S	Lagopus lagopus	Red grouse			correlational	comb	size	Body Condition	body condition	mass corrected by size (residuals)		1			0.363121	0.140028
UNPAIRED	WOS:000440036000012	2018	2018	Pardal, Sara and Alves, Jose A. and Mota, Paulo G. and Ramos, Jaime A.	Limosa limosa	Black tailed godwit			correlational	plumage composite (ventral)	colour extent	Body Condition	immunity	innate immunity		-1			-0.333988	0.19245
UNPAIRED	WOS:000440036000012	2018	2018	Pardal, Sara and Alves, Jose A. and Mota, Paulo G. and Ramos, Jaime A.	Limosa limosa	Black tailed godwit			correlational	plumage composite (ventral)	colour extent	Body Condition	body condition	mass corrected by size (residuals)		-1			0.0686476	0.19245
UNPAIRED	male5	2001	2001	Johnsen, A, Lifjeld, JT, Andersson, S, Örnborg, J, Amundsen, T	Luscinia svecica	Bluethroat			correlational	plumage throat	shortwave chroma	Fitness	reproductive success	extra-pair fertilisation success		1			0.101255	0.144338
UNPAIRED	male5	2001	2001	Johnsen, A, Lifjeld, JT, Andersson, S, Örnborg, J, Amundsen, T	Luscinia svecica	Bluethroat			correlational	plumage throat	UV chroma	Fitness	reproductive success	extra-pair fertilisation success		1			0.0599641	0.144338
UNPAIRED	male5	2001	2001	Johnsen, A, Lifjeld, JT, Andersson, S, Örnborg, J, Amundsen, T	Luscinia svecica	Bluethroat			correlational	plumage throat	brightness	Fitness	reproductive success	extra-pair fertilisation success		1			0.0471254	0.144338
UNPAIRED	male5	2001	2001	Johnsen, A, Lifjeld, JT, Andersson, S, Örnborg, J, Amundsen, T	Luscinia svecica	Bluethroat			correlational	plumage throat	hue	Fitness	reproductive success	extra-pair fertilisation success		1			-0.017142	0.144338
UNPAIRED	male5	2001	2001	Johnsen, A, Lifjeld, JT, Andersson, S, Örnborg, J, Amundsen, T	Luscinia svecica	Bluethroat			correlational	plumage band	size	Fitness	reproductive success	extra-pair fertilisation success		1			-0.0592948	0.136083
UNPAIRED	male5	2001	2001	Johnsen, A, Lifjeld, JT, Andersson, S, Örnborg, J, Amundsen, T	Luscinia svecica	Bluethroat			correlational	plumage throat	shortwave chroma	Fitness	reproductive success	total fertilisation success		1			0.423649	0.160128
UNPAIRED	male5	2001	2001	Johnsen, A, Lifjeld, JT, Andersson, S, Örnborg, J, Amundsen, T	Luscinia svecica	Bluethroat			correlational	plumage throat	UV chroma	Fitness	reproductive success	total fertilisation success		1			0.15114	0.160128
UNPAIRED	male5	2001	2001	Johnsen, A, Lifjeld, JT, Andersson, S, Örnborg, J, Amundsen, T	Luscinia svecica	Bluethroat			correlational	plumage throat	brightness	Fitness	reproductive success	total fertilisation success		1			0.13074	0.160128
UNPAIRED	male5	2001	2001	Johnsen, A, Lifjeld, JT, Andersson, S, Örnborg, J, Amundsen, T	Luscinia svecica	Bluethroat			correlational	plumage throat	hue	Fitness	reproductive success	total fertilisation success		1			0.0400214	0.160128
UNPAIRED	male5	2001	2001	Johnsen, A, Lifjeld, JT, Andersson, S, Örnborg, J, Amundsen, T	Luscinia svecica	Bluethroat			correlational	plumage band	size	Fitness	reproductive success	total fertilisation success		1			-0.0600722	0.166667
UNPAIRED	male5	2001	2001	Johnsen, A, Lifjeld, JT, Andersson, S, Örnborg, J, Amundsen, T	Luscinia svecica	Bluethroat			correlational	plumage throat	shortwave chroma	Fitness	reproductive success	within pair paternity		1			0.52502	0.160128
UNPAIRED	male5	2001	2001	Johnsen, A, Lifjeld, JT, Andersson, S, Örnborg, J, Amundsen, T	Luscinia svecica	Bluethroat			correlational	plumage throat	UV chroma	Fitness	reproductive success	within pair paternity		1			0.305135	0.160128
UNPAIRED	male5	2001	2001	Johnsen, A, Lifjeld, JT, Andersson, S, Örnborg, J, Amundsen, T	Luscinia svecica	Bluethroat			correlational	plumage throat	brightness	Fitness	reproductive success	within pair paternity		1			-0.0355383	0.160128
UNPAIRED	male5	2001	2001	Johnsen, A, Lifjeld, JT, Andersson, S, Örnborg, J, Amundsen, T	Luscinia svecica	Bluethroat			correlational	plumage throat	hue	Fitness	reproductive success	within pair paternity		1			0.0358722	0.160128
UNPAIRED	male5	2001	2001	Johnsen, A, Lifjeld, JT, Andersson, S, Örnborg, J, Amundsen, T	Luscinia svecica	Bluethroat			correlational	plumage band	size	Fitness	reproductive success	within pair paternity		1			2.30162	0.2
UNPAIRED	male5	2001	2001	Johnsen, A, Lifjeld, JT, Andersson, S, Örnborg, J, Amundsen, T	Luscinia svecica	Bluethroat			correlational	plumage band	size	Fitness	reproductive success	within pair paternity		1			-0.017543	0.166667
UNPAIRED	male6	1998	1998	Johnsen, A, Andersson, S, Örnborg, J, Lifjeld, JT	Luscinia svecica	Bluethroat			experimental	plumage throat	UV reflectance	Fitness	reproductive success	paternity loss		1			0.0903841	0.27735
UNPAIRED	male6	1998	1998	Johnsen, A, Andersson, S, Örnborg, J, Lifjeld, JT	Luscinia svecica	Bluethroat			experimental	plumage throat	UV reflectance	Fitness	reproductive success	paternity loss		1			0.230111	0.156174
UNPAIRED	male6	1998	1998	Johnsen, A, Andersson, S, Örnborg, J, Lifjeld, JT	Luscinia svecica	Bluethroat			experimental	plumage throat	UV reflectance	Fitness	reproductive success	total fertilisation success		-1			-0.0332759	0.288675
UNPAIRED	male6	1998	1998	Johnsen, A, Andersson, S, Örnborg, J, Lifjeld, JT	Luscinia svecica	Bluethroat			experimental	plumage throat	UV reflectance	Fitness	reproductive success	total fertilisation success		-1			-0.221134	0.160128
UNPAIRED	male6	1998	1998	Johnsen, A, Andersson, S, Örnborg, J, Lifjeld, JT	Luscinia svecica	Bluethroat			experimental	plumage throat	UV reflectance	Fitness	timing of breeding	laying date		1			0.17375	0.25
UNPAIRED	male6	1998	1998	Johnsen, A, Andersson, S, Örnborg, J, Lifjeld, JT	Luscinia svecica	Bluethroat			experimental	plumage throat	UV reflectance	Fitness	timing of breeding	laying date		1			0.286546	0.158114
UNPAIRED	WOS:000347703700008	2015	2015	Surmacki, Adrian and Stepniewski, Janusz and Stepniewska, Malgorzata	Panurus biarmicus	Bearded reedling			correlational	bill colour	chroma	Body Condition	parasites	parasite infection		1			0.45134	0.2
UNPAIRED	WOS:000241344600012	2006	2006	Hidalgo-Garcia, Sergio	Cyanistes caeruleus	Blue tit			correlational	plumage breast	brightness	Fitness	offspring quality or condition	mass corrected by size (covariate, nestlings)		1			0.49558	0.196116
UNPAIRED	WOS:000323114200042	2013	2013	Pickett, Simon R. A. and Weber, Sam B. and McGraw, Kevin J. and Norris, Ken J. and Evans, Matthew R.	Parus major	Great tit			correlational	plumage ventral	brightness	Fitness	offspring quality or condition	nestling immune response		1			0.225502	0.0291358
UNPAIRED	male19	2011	2011	Remes, V, Matysiokova, B, Klejdus, B	Parus major	Great tit			correlational	plumage breast	UV chroma	Fitness	offspring quality or condition	yolk antioxidants		1			0.30919	0.111803
UNPAIRED	male19	2011	2011	Remes, V, Matysiokova, B, Klejdus, B	Parus major	Great tit			correlational	plumage breast	chroma	Fitness	offspring quality or condition	yolk antioxidants		1			0.0219511	0.111803
UNPAIRED	male19	2011	2011	Remes, V, Matysiokova, B, Klejdus, B	Parus major	Great tit			correlational	plumage breast band	size	Fitness	offspring quality or condition	yolk antioxidants		1			0.0367525	0.111803
UNPAIRED	male19	2011	2011	Remes, V, Matysiokova, B, Klejdus, B	Parus major	Great tit			correlational	plumage face (cheeks)	immaculateness	Fitness	offspring quality or condition	yolk antioxidants		1			-0.00115163	0.111803
UNPAIRED	male19	2011	2011	Remes, V, Matysiokova, B, Klejdus, B	Parus major	Great tit			correlational	plumage breast	UV chroma	Fitness	offspring quality or condition	yolk antioxidants		1			-0.00345032	0.111803
UNPAIRED	male19	2011	2011	Remes, V, Matysiokova, B, Klejdus, B	Parus major	Great tit			correlational	plumage breast	chroma	Fitness	offspring quality or condition	yolk antioxidants		1			0.0362659	0.111803
UNPAIRED	male19	2011	2011	Remes, V, Matysiokova, B, Klejdus, B	Parus major	Great tit			correlational	plumage breast band	size	Fitness	offspring quality or condition	yolk antioxidants		1			-0.0728197	0.111803
UNPAIRED	male19	2011	2011	Remes, V, Matysiokova, B, Klejdus, B	Parus major	Great tit			correlational	plumage face (cheeks)	immaculateness	Fitness	offspring quality or condition	yolk antioxidants		1			-0.073505	0.111803
UNPAIRED	male19	2011	2011	Remes, V, Matysiokova, B, Klejdus, B	Parus major	Great tit			correlational	plumage breast	UV chroma	Fitness	offspring quality or condition	yolk antioxidants		1			0.241148	0.111803
UNPAIRED	male19	2011	2011	Remes, V, Matysiokova, B, Klejdus, B	Parus major	Great tit			correlational	plumage breast	chroma	Fitness	offspring quality or condition	yolk antioxidants		1			-0.0512764	0.111803
UNPAIRED	male19	2011	2011	Remes, V, Matysiokova, B, Klejdus, B	Parus major	Great tit			correlational	plumage breast band	size	Fitness	offspring quality or condition	yolk antioxidants		1			0.00364904	0.111803
UNPAIRED	male19	2011	2011	Remes, V, Matysiokova, B, Klejdus, B	Parus major	Great tit			correlational	plumage face (cheeks)	immaculateness	Fitness	offspring quality or condition	yolk antioxidants		1			0.0196626	0.111803
UNPAIRED	male19	2011	2011	Remes, V, Matysiokova, B, Klejdus, B	Parus major	Great tit			correlational	plumage breast	UV chroma	Fitness	offspring quality or condition	yolk mass		1			-0.0355484	0.109109
UNPAIRED	male19	2011	2011	Remes, V, Matysiokova, B, Klejdus, B	Parus major	Great tit			correlational	plumage breast	chroma	Fitness	offspring quality or condition	yolk mass		1			-0.150091	0.109109
UNPAIRED	male19	2011	2011	Remes, V, Matysiokova, B, Klejdus, B	Parus major	Great tit			correlational	plumage breast band	size	Fitness	offspring quality or condition	yolk mass		1			0.393379	0.109109
UNPAIRED	male19	2011	2011	Remes, V, Matysiokova, B, Klejdus, B	Parus major	Great tit			correlational	plumage face (cheeks)	immaculateness	Fitness	offspring quality or condition	yolk mass		1			0.0539687	0.109109
UNPAIRED	WOS:000233367300004	2005	2005	Mand, R and Tilgar, V and Moller, AP	Parus major	Great tit			correlational	plumage breast	hue	Fitness	offspring quality or condition	body mass of fledglings		1			0.0671517	0.102062
UNPAIRED	WOS:000233367300004	2005	2005	Mand, R and Tilgar, V and Moller, AP	Parus major	Great tit			correlational	plumage breast	hue	Fitness	reproductive success	clutch size		1			-0.0339618	0.0966736
UNPAIRED	WOS:000233367300004	2005	2005	Mand, R and Tilgar, V and Moller, AP	Parus major	Great tit			correlational	plumage breast	hue	Fitness	reproductive success	number of hatchlings		1			-0.0829996	0.107211
UNPAIRED	male7	2001	2001	Hõrak, P, Ots, I, Spottiswoode, HVC, Møller, AP	Parus major	Great tit			correlational	plumage breast	hue	Body Condition	parasites	parasite infection		1			0.257829	0.145865
UNPAIRED	male7	2001	2001	Hõrak, P, Ots, I, Spottiswoode, HVC, Møller, AP	Parus major	Great tit			correlational	plumage breast	hue	Body Condition	parasites	parasite infection		1			-0.297724	0.0842152
UNPAIRED	WOS:000414212500001	2017	2017	Cantarero, Alejandro and Lopez-Arrabe, Jimena and Palma, Antonio and Moreno, Juan	Petronia petronia	Rock sparrow			correlational	plumage breast patch	size	Fitness	offspring quality or condition	nestling oxidative damage		-1			0.390825	0.131306
UNPAIRED	WOS:000414212500001	2017	2017	Cantarero, Alejandro and Lopez-Arrabe, Jimena and Palma, Antonio and Moreno, Juan	Petronia petronia	Rock sparrow			correlational	plumage breast patch	size	Fitness	offspring quality or condition	nestling tarsus length		1			-0.284679	0.129099
UNPAIRED	WOS:000414212500001	2017	2017	Cantarero, Alejandro and Lopez-Arrabe, Jimena and Palma, Antonio and Moreno, Juan	Petronia petronia	Rock sparrow			correlational	plumage breast patch	size	Fitness	offspring quality or condition	nestling wing length		1			0.213104	0.188982
UNPAIRED	WOS:000414212500001	2017	2017	Cantarero, Alejandro and Lopez-Arrabe, Jimena and Palma, Antonio and Moreno, Juan	Petronia petronia	Rock sparrow			correlational	plumage breast patch	size	Fitness	offspring quality or condition	nestling wing length		1			-0.0524623	0.196116
UNPAIRED	WOS:000325754100001	2013	2013	Garcia-Navas, Vicente and Garcia del Rincon, Amanda and Ferrer, Esperanza S. and Fathi, Hicham	Petronia petronia	Rock sparrow			correlational	plumage breast patch	size	Fitness	offspring quality or condition	nestling tarsus length		1			0.628316	0.204124
UNPAIRED	WOS:000174502800003	2002	2002	Blanco, G and De la Puente, J	Pica pica	Black billed magpie			correlational	tail	tail current quality and tail condition	Body Condition	body size	keel length		1			0.554498	0.229416
UNPAIRED	WOS:000174502800003	2002	2002	Blanco, G and De la Puente, J	Pica pica	Black billed magpie			correlational	tail	length	Body Condition	immunity	spleen volume		1			0.824791	0.229416
UNPAIRED	WOS:000174502800003	2002	2002	Blanco, G and De la Puente, J	Pica pica	Black billed magpie			correlational	tail	tail current quality and tail condition	Body Condition	immunity	spleen volume		1			0.468127	0.229416
UNPAIRED	WOS:000174502800003	2002	2002	Blanco, G and De la Puente, J	Pica pica	Black billed magpie			correlational	tail	tail current quality and tail condition	Body Condition	body condition	mass corrected by size (residuals)		1			0.626484	0.19245
UNPAIRED	WOS:000174502800003	2002	2002	Blanco, G and De la Puente, J	Pica pica	Black billed magpie			correlational	tail	length	Body Condition	body condition	mass corrected by size (residuals)		1			0.430239	0.229416
UNPAIRED	male11	2010	2010	Germain, RR, Reudink, MW, Marra, PP, Ratcliffe, LM	Setophaga ruticilla	American redstart			correlational	plumage bib	size	Fitness	parental quality	feeding rate		1			0.0824787	0.188982
UNPAIRED	male11	2010	2010	Germain, RR, Reudink, MW, Marra, PP, Ratcliffe, LM	Setophaga ruticilla	American redstart			correlational	plumage flanks	color	Fitness	parental quality	feeding rate		-1			0.203096	0.188982
UNPAIRED	male11	2010	2010	Germain, RR, Reudink, MW, Marra, PP, Ratcliffe, LM	Setophaga ruticilla	American redstart			correlational	plumage tail	brigthness	Fitness	parental quality	feeding rate		1			-0.0737879	0.188982
UNPAIRED	male11	2010	2010	Germain, RR, Reudink, MW, Marra, PP, Ratcliffe, LM	Setophaga ruticilla	American redstart			correlational	plumage tail	color	Fitness	parental quality	feeding rate		1			-0.247025	0.188982
UNPAIRED	male11	2010	2010	Germain, RR, Reudink, MW, Marra, PP, Ratcliffe, LM	Setophaga ruticilla	American redstart			correlational	plumage flanks	brightness	Fitness	parental quality	feeding rate		1			0.668399	0.185695
UNPAIRED	male9	2009a	2009	Reudink, MW, Marra, PP, Boag, PT, Ratcliffe, LM	Setophaga ruticilla	American redstart			correlational	plumage tail	brightness	Fitness	reproductive success	reproductive success (polygyny)		1			0.298842	0.119523
UNPAIRED	male9	2009a	2009	Reudink, MW, Marra, PP, Boag, PT, Ratcliffe, LM	Setophaga ruticilla	American redstart			correlational	plumage ventral flanks	color	Fitness	reproductive success	reproductive success (secured paternity)		1			0.370484	0.162221
UNPAIRED	male10	2009b	2009	Reudink, MW, Studds, CE, Marra, PP, Kyser, TK, Ratcliffe, LM	Setophaga ruticilla	American redstart			correlational	plumage tail	brigthness	Body Condition	body size	body size		1			0.212785	0.130189
UNPAIRED	male10	2009b	2009	Reudink, MW, Studds, CE, Marra, PP, Kyser, TK, Ratcliffe, LM	Setophaga ruticilla	American redstart			correlational	plumage bib	size	Body Condition	environment	environmental condition (habitat high vs low quality)		1			0.255194	0.218218
UNPAIRED	male10	2009b	2009	Reudink, MW, Studds, CE, Marra, PP, Kyser, TK, Ratcliffe, LM	Setophaga ruticilla	American redstart			correlational	plumage tail	brightness	Body Condition	environment	environmental condition (habitat high vs low quality)		1			0.255053	0.169031
UNPAIRED	male10	2009b	2009	Reudink, MW, Studds, CE, Marra, PP, Kyser, TK, Ratcliffe, LM	Setophaga ruticilla	American redstart			correlational	plumage tail	brightness	Body Condition	environment	environmental condition (habitat high vs low quality)		1			0.575798	0.218218
UNPAIRED	male10	2009b	2009	Reudink, MW, Studds, CE, Marra, PP, Kyser, TK, Ratcliffe, LM	Setophaga ruticilla	American redstart			correlational	plumage tail	UV chroma	Body Condition	environment	environmental condition (habitat high vs low quality)		1			0	0.169031
UNPAIRED	male10	2009b	2009	Reudink, MW, Studds, CE, Marra, PP, Kyser, TK, Ratcliffe, LM	Setophaga ruticilla	American redstart			correlational	plumage tail	UV chroma	Body Condition	environment	environmental condition (habitat high vs low quality)		1			-0.33463	0.218218
UNPAIRED	male10	2009b	2009	Reudink, MW, Studds, CE, Marra, PP, Kyser, TK, Ratcliffe, LM	Setophaga ruticilla	American redstart			correlational	plumage tail	red chroma	Body Condition	environment	environmental condition (habitat high vs low quality)		1			0	0.169031
UNPAIRED	male10	2009b	2009	Reudink, MW, Studds, CE, Marra, PP, Kyser, TK, Ratcliffe, LM	Setophaga ruticilla	American redstart			correlational	plumage tail	red chroma	Body Condition	environment	environmental condition (habitat high vs low quality)		1			0	0.218218
UNPAIRED	male10	2009b	2009	Reudink, MW, Studds, CE, Marra, PP, Kyser, TK, Ratcliffe, LM	Setophaga ruticilla	American redstart			correlational	plumage tail	hue	Body Condition	environment	environmental condition (habitat high vs low quality)		1			0.3937	0.169031
UNPAIRED	male10	2009b	2009	Reudink, MW, Studds, CE, Marra, PP, Kyser, TK, Ratcliffe, LM	Setophaga ruticilla	American redstart			correlational	plumage tail	hue	Body Condition	environment	environmental condition (habitat high vs low quality)		1			0.176218	0.218218
UNPAIRED	WOS:000248962200003	2007	2007	Balenger, Susan L. and Johnson, L. Scott and Brubaker, Jessica L. and Ostlind, Emilene	Sialia currucoides	Mountain bluebird			correlational	plumage rump	colour intensity	Fitness	parental quality	feeding rate		1			0.0902442	0.132453
UNPAIRED	male8	2003	2003	Siefferman, L, Hill, GE	Sialia sialis	Eastern bluebird			correlational	plumage breast	extent and color	Fitness	offspring quality or condition	offspring mass		1			0.497311	0.258199
UNPAIRED	male8	2003	2003	Siefferman, L, Hill, GE	Sialia sialis	Eastern bluebird			correlational	plumage breast	extent and color	Fitness	parental quality	incubation provisioning rate (mate provisioning)		1			-0.15114	0.235702
UNPAIRED	male8	2003	2003	Siefferman, L, Hill, GE	Sialia sialis	Eastern bluebird			correlational	plumage tail and rump	color	Fitness	parental quality	incubation provisioning rate (mate provisioning)		1			0.0500417	0.235702
UNPAIRED	male8	2003	2003	Siefferman, L, Hill, GE	Sialia sialis	Eastern bluebird			correlational	plumage breast	extent and color	Fitness	parental quality	nestling provisioning rate		1			0.472231	0.288675
UNPAIRED	male8	2003	2003	Siefferman, L, Hill, GE	Sialia sialis	Eastern bluebird			correlational	plumage tail and rump	color	Fitness	parental quality	nestling provisioning rate		1			-0.287682	0.288675
UNPAIRED	male8	2003	2003	Siefferman, L, Hill, GE	Sialia sialis	Eastern bluebird			correlational	plumage breast	extent and color	Fitness	reproductive success	reproductive success (number of offspring fledged)		1			0.100335	0.242536
UNPAIRED	male8	2003	2003	Siefferman, L, Hill, GE	Sialia sialis	Eastern bluebird			correlational	plumage tail and rump	color	Fitness	reproductive success	reproductive success (number of offspring fledged)		1			0.725005	0.242536
UNPAIRED	male8	2003	2003	Siefferman, L, Hill, GE	Sialia sialis	Eastern bluebird			correlational	plumage breast	extent and color	Fitness	timing of breeding	laying date		-1			-0.497311	0.223607
UNPAIRED	WOS:000257912700002	2008	2008	Bitton, Pierre-Paul and Dawson, Russell D. and Ochs, Courtney L.	Tachycineta bicolor	Tree swallow			correlational	plumage rump	brightness	Fitness	reproductive success	fledging success		1			-0.024077	0.109109
UNPAIRED	WOS:000458156900001	2019	2019	Griebel, Ilsa A. and Dawson, Russell D.	Tachycineta bicolor	Tree swallow			correlational	plumage rump	hue	Fitness	reproductive success	Nestling survival		-1			-0.172768	0.0495074
UNPAIRED	WOS:000169755900007	2001a	2001	Roulin, A and Dijkstra, C and Riols, C and Ducrest, AL	Tyto alba	Barn owl			correlational	plumage ventral areas	colour	Fitness	parental quality	offspring feeding rate		-1			-0.4847	0.2
UNPAIRED	WOS:000169755900007	2001a	2001	Roulin, A and Dijkstra, C and Riols, C and Ducrest, AL	Tyto alba	Barn owl			correlational	plumage ventral areas	colour	Fitness	reproductive success	clutch size		-1			-0.266108	0.182574
UNPAIRED	WOS:000180748500008	2003	2003	Roulin, A and Ducrest, AL and Balloux, F and Dijkstra, C and Riols, C	Tyto alba	Barn owl			correlational	plumage ventral areas (undperparts)	spottiness	Body Condition	body condition	fluctuating asymmetry		-1			-0.347179	0.171499
UNPAIRED	WOS:000302485200003	2012	2012	van den Brink, Valentijn and Dolivo, Vassilissa and Falourd, Xavier and Dreiss, Amelie N. and Roulin, Alexandre	Tyto alba	Barn owl			correlational	plumage spots	size	Fitness	offspring quality or condition	nestling docility		-1			-0.250533	0.101535
UNPAIRED	WOS:000395510000012	2017	2017	Grunst, Andrea S. and Grunst, Melissa L. and Rathbun, Nathan A. and Hubbard, Joanna K. and Safran, Rebecca J. and Gonser, Rusty A. and Tuttle, Elaina M.	Zonotrichia albicollis	White throated sparrow			correlational	plumage crown stripes	contrast	Fitness	reproductive success	extra-pair paternity		-1			-0.0309241	0.0800641
UNPAIRED	WOS:000395510000012	2017	2017	Grunst, Andrea S. and Grunst, Melissa L. and Rathbun, Nathan A. and Hubbard, Joanna K. and Safran, Rebecca J. and Gonser, Rusty A. and Tuttle, Elaina M.	Zonotrichia albicollis	White throated sparrow			correlational	plumage crown stripes	saturation	Fitness	reproductive success	extra-pair paternity		-1			0.0973913	0.0800641
UNPAIRED	WOS:000395510000012	2017	2017	Grunst, Andrea S. and Grunst, Melissa L. and Rathbun, Nathan A. and Hubbard, Joanna K. and Safran, Rebecca J. and Gonser, Rusty A. and Tuttle, Elaina M.	Zonotrichia albicollis	White throated sparrow			correlational	plumage crown stripes	saturation	Fitness	reproductive success	reproductive success		1			0.00746418	0.102598
UNPAIRED	WOS:000395510000012	2017	2017	Grunst, Andrea S. and Grunst, Melissa L. and Rathbun, Nathan A. and Hubbard, Joanna K. and Safran, Rebecca J. and Gonser, Rusty A. and Tuttle, Elaina M.	Zonotrichia albicollis	White throated sparrow			correlational	plumage crown stripes	saturation	Fitness	reproductive success	reproductive success		1			-0.113804	0.0909091
UNPAIRED	WOS:000395510000012	2017	2017	Grunst, Andrea S. and Grunst, Melissa L. and Rathbun, Nathan A. and Hubbard, Joanna K. and Safran, Rebecca J. and Gonser, Rusty A. and Tuttle, Elaina M.	Zonotrichia albicollis	White throated sparrow			correlational	plumage crown stripes	contrast	Fitness	reproductive success	reproductive success		1			0.187048	0.125
UNPAIRED	WOS:000395510000012	2017	2017	Grunst, Andrea S. and Grunst, Melissa L. and Rathbun, Nathan A. and Hubbard, Joanna K. and Safran, Rebecca J. and Gonser, Rusty A. and Tuttle, Elaina M.	Zonotrichia albicollis	White throated sparrow			correlational	plumage crown stripes	contrast	Fitness	reproductive success	reproductive success		1			-0.326619	0.136083
UNPAIRED	WOS:000395510000012	2017	2017	Grunst, Andrea S. and Grunst, Melissa L. and Rathbun, Nathan A. and Hubbard, Joanna K. and Safran, Rebecca J. and Gonser, Rusty A. and Tuttle, Elaina M.	Zonotrichia albicollis	White throated sparrow			correlational	plumage crown stripes	contrast	Fitness	survival	survival		1			0.203551	0.149071
UNPAIRED	WOS:000395510000012	2017	2017	Grunst, Andrea S. and Grunst, Melissa L. and Rathbun, Nathan A. and Hubbard, Joanna K. and Safran, Rebecca J. and Gonser, Rusty A. and Tuttle, Elaina M.	Zonotrichia albicollis	White throated sparrow			correlational	plumage crown stripes	contrast	Fitness	survival	survival		1			-0.180045	0.145865
UNPAIRED	WOS:000395510000012	2017	2017	Grunst, Andrea S. and Grunst, Melissa L. and Rathbun, Nathan A. and Hubbard, Joanna K. and Safran, Rebecca J. and Gonser, Rusty A. and Tuttle, Elaina M.	Zonotrichia albicollis	White throated sparrow			correlational	plumage crown stripes	contrast	Body Condition	body condition	mass corrected by size (residuals)		1			0.22646	0.090167
UNPAIRED	WOS:000395510000012	2017	2017	Grunst, Andrea S. and Grunst, Melissa L. and Rathbun, Nathan A. and Hubbard, Joanna K. and Safran, Rebecca J. and Gonser, Rusty A. and Tuttle, Elaina M.	Zonotrichia albicollis	White throated sparrow			correlational	plumage crown stripes	contrast	Body Condition	body condition	mass corrected by size (residuals)		1			0.133765	0.119523
UNPAIRED	WOS:000395510000012	2017	2017	Grunst, Andrea S. and Grunst, Melissa L. and Rathbun, Nathan A. and Hubbard, Joanna K. and Safran, Rebecca J. and Gonser, Rusty A. and Tuttle, Elaina M.	Zonotrichia albicollis	White throated sparrow			correlational	plumage crown stripes	contrast	Body Condition	body condition	mass corrected by size (residuals)		1			0.34084	0.13484
UNPAIRED	WOS:000395510000012	2017	2017	Grunst, Andrea S. and Grunst, Melissa L. and Rathbun, Nathan A. and Hubbard, Joanna K. and Safran, Rebecca J. and Gonser, Rusty A. and Tuttle, Elaina M.	Zonotrichia albicollis	White throated sparrow			correlational	plumage crown stripes	saturation	Body Condition	body condition	mass corrected by size (residuals)		1			0.238563	0.119523
UNPAIRED	WOS:000395510000012	2017	2017	Grunst, Andrea S. and Grunst, Melissa L. and Rathbun, Nathan A. and Hubbard, Joanna K. and Safran, Rebecca J. and Gonser, Rusty A. and Tuttle, Elaina M.	Zonotrichia albicollis	White throated sparrow			correlational	plumage crown stripes	saturation	Body Condition	body condition	mass corrected by size (residuals)		1			-0.181075	0.13484
UNPAIRED	WOS:000184899600009	2003	2003	Pilastro, A and Griggio, M and Matessi, G	Petronia petronia	Rock sparrow			correlational	plumage breast patch	size	Body Condition	body size	body mass	1		0.331647	0.166667
UNPAIRED	WOS:000184899600009	2003	2003	Pilastro, A and Griggio, M and Matessi, G	Petronia petronia	Rock sparrow			correlational	plumage breast patch	size	Fitness	reproductive success	presence of a second brood	1		0.0699379	0.156174
UNPAIRED	WOS:000269956400008	2009	2009	Hanssen, Sveinn Are and Bustnes, Jan O. and Tveraa, Torkild and Hasselquist, Dennis and Varpe, Oystein and Henden, John-Andre	Catharacta maccormicki	South polar skua			correlational	plumage wing patch	whiteness	Fitness	reproductive success	clutch size	1		0.341493	0.123091
UNPAIRED	WOS:000269956400008	2009	2009	Hanssen, Sveinn Are and Bustnes, Jan O. and Tveraa, Torkild and Hasselquist, Dennis and Varpe, Oystein and Henden, John-Andre	Catharacta maccormicki	South polar skua			correlational	plumage wing patch	size	Fitness	offspring quality or condition	egg volume	1		0.288812	0.123091
UNPAIRED	WOS:000269956400008	2009	2009	Hanssen, Sveinn Are and Bustnes, Jan O. and Tveraa, Torkild and Hasselquist, Dennis and Varpe, Oystein and Henden, John-Andre	Catharacta maccormicki	South polar skua			correlational	plumage wing patch	whiteness	Fitness	reproductive success	nestling success	1		0.21016	0.123091
UNPAIRED	WOS:000269956400008	2009	2009	Hanssen, Sveinn Are and Bustnes, Jan O. and Tveraa, Torkild and Hasselquist, Dennis and Varpe, Oystein and Henden, John-Andre	Catharacta maccormicki	South polar skua			correlational	plumage wing patch	whiteness	Body Condition	immunity	immune response		1			0.838847	0.377964
UNPAIRED	WOS:000269956400008	2009	2009	Hanssen, Sveinn Are and Bustnes, Jan O. and Tveraa, Torkild and Hasselquist, Dennis and Varpe, Oystein and Henden, John-Andre	Catharacta maccormicki	South polar skua			correlational	plumage wing patch	size	Fitness	survival	survival	1		-0.362352	0.125988
UNPAIRED	WOS:000269956400008	2009	2009	Hanssen, Sveinn Are and Bustnes, Jan O. and Tveraa, Torkild and Hasselquist, Dennis and Varpe, Oystein and Henden, John-Andre	Catharacta maccormicki	South polar skua			correlational	plumage wing patch	whiteness	Fitness	survival	survival	1		0.268859	0.125988
PAIRED	WOS:000288164800009	2011	2011	Klenova, Anna V. and Zubakin, Victor A. and Zubakina, Elena V.	Aethia cristatella	Crested auklet	0.166708	0.196474	correlational	plumage crest	size	Body Condition	body size	wing length	1	1	0.40006	0.149071	0.0100003	0.13484
PAIRED	WOS:000288164800009	2011	2011	Klenova, Anna V. and Zubakin, Victor A. and Zubakina, Elena V.	Aethia cristatella	Crested auklet	0.166708	0.196474	correlational	plumage crest	size	Body Condition	body condition	mass corrected by size (residuals)	1	1	0.120581	0.149071	0.0500417	0.13484
PAIRED	WOS:000288164800009	2011	2011	Klenova, Anna V. and Zubakin, Victor A. and Zubakina, Elena V.	Aethia cristatella	Crested auklet	0.125653	0.196328	correlational	plumage auricular plume	size	Body Condition	body size	wing length	1	1	-0.0100003	0.149071	-0.0100003	0.13484
PAIRED	WOS:000288164800009	2011	2011	Klenova, Anna V. and Zubakin, Victor A. and Zubakina, Elena V.	Aethia cristatella	Crested auklet	0.125653	0.196328	correlational	plumage auricular plume	size	Body Condition	body condition	mass corrected by size (residuals)	1	1	0.15114	0.149071	0.192337	0.13484
PAIRED	WOS:000289486000010	2011	2011	Butler, Michael W. and McGraw, Kevin J.	Anas platyrhynchos	Mallard (captive)			correlational	bill	brightness	Body Condition	immunity	immune response	-1	-1	0.610687	0.301511	-0.339831	0.204124
PAIRED	WOS:000289486000010	2011	2011	Butler, Michael W. and McGraw, Kevin J.	Anas platyrhynchos	Mallard (captive)			correlational	bill	saturation	Body Condition	immunity	immune response	-1	-1	0.103896	0.301511	-0.324718	0.204124
PAIRED	WOS:000289486000010	2011	2011	Butler, Michael W. and McGraw, Kevin J.	Anas platyrhynchos	Mallard (captive)			correlational	bill	hue	Body Condition	immunity	immune response	1	1	-0.44108	0.301511	0.317737	0.204124
PAIRED	WOS:000289486000010	2011	2011	Butler, Michael W. and McGraw, Kevin J.	Anas platyrhynchos	Mallard (captive)			correlational	bill	brightness	Body Condition	immunity	immune response	-1	-1	0.0100657	0.288675	-0.379658	0.204124
PAIRED	WOS:000289486000010	2011	2011	Butler, Michael W. and McGraw, Kevin J.	Anas platyrhynchos	Mallard (captive)			correlational	bill	saturation	Body Condition	immunity	immune response	-1	-1	-0.414134	0.288675	0.009067	0.204124
PAIRED	WOS:000289486000010	2011	2011	Butler, Michael W. and McGraw, Kevin J.	Anas platyrhynchos	Mallard (captive)			correlational	bill	hue	Body Condition	immunity	immune response	1	1	0.19869	0.288675	0.147785	0.204124
PAIRED	WOS:000289486000010	2011	2011	Butler, Michael W. and McGraw, Kevin J.	Anas platyrhynchos	Mallard (captive)	-0.0642841	0.316502	correlational	feet	brightness	Body Condition	immunity	immune response	-1	-1	0.346574	0.301511	0.225247	0.204124
PAIRED	WOS:000289486000010	2011	2011	Butler, Michael W. and McGraw, Kevin J.	Anas platyrhynchos	Mallard (captive)	0.364011	0.31903	correlational	feet	saturation	Body Condition	immunity	immune response	-1	-1	-0.0408135	0.301511	0.226957	0.204124
PAIRED	WOS:000289486000010	2011	2011	Butler, Michael W. and McGraw, Kevin J.	Anas platyrhynchos	Mallard (captive)	0.781764	0.328285	correlational	feet	hue	Body Condition	immunity	immune response	1	1	-0.319839	0.301511	-0.138124	0.204124
PAIRED	WOS:000289486000010	2011	2011	Butler, Michael W. and McGraw, Kevin J.	Anas platyrhynchos	Mallard (captive)	-0.0642841	0.316502	correlational	feet	brightness	Body Condition	immunity	immune response	-1	-1	-0.204265	0.288675	0.251124	0.204124
PAIRED	WOS:000289486000010	2011	2011	Butler, Michael W. and McGraw, Kevin J.	Anas platyrhynchos	Mallard (captive)	0.364011	0.31903	correlational	feet	saturation	Body Condition	immunity	immune response	-1	-1	0.0277315	0.288675	0.121357	0.204124
PAIRED	WOS:000289486000010	2011	2011	Butler, Michael W. and McGraw, Kevin J.	Anas platyrhynchos	Mallard (captive)	0.781764	0.328285	correlational	feet	hue	Body Condition	immunity	immune response	1	1	0.163355	0.288675	0.0489702	0.204124
UNPAIRED	WOS:000294925600004	2011	2011	Dobson, F. Stephen and Couchoux, Charline and Jouventin, Pierre	Aptenodytes patagonicus	King penguin			correlational	plumage ear patch	size	Body Condition	body size	body mass		1			0.00500004	0.120386
PAIRED	WOS:000294925600004	2011	2011	Dobson, F. Stephen and Couchoux, Charline and Jouventin, Pierre	Aptenodytes patagonicus	King penguin	0.535398	0.170825	correlational	plumage ear patch	size	Body Condition	body size	multiple morphological traits	1	1	0.131956	0.130189	0.113958	0.124035
UNPAIRED	WOS:000323085500001	2013	2013	Blanco, Guillermo and Fargallo, Juan A.	Pica pica	Eurasian black-billed magpie			correlational	plumage wing patch	size	Body Condition	immunity	spleen volume		1			0.43505	0.176777
UNPAIRED	WOS:000323085500001	2013	2013	Blanco, Guillermo and Fargallo, Juan A.	Pica pica	Eurasian black-billed magpie			correlational	plumage wing patch	size	Body Condition	parasites	parasite abundance		-1			-0.368211	0.176777
UNPAIRED	WOS:000325995900005	2013	2013	Henderson, Lindsay J. and Heidinger, Britt J. and Evans, Neil P. and Arnold, Kathryn E.	Cyanistes caeruleus	Blue tit			correlational	plumage crown	UV reflectance	Body Condition	body condition	mass corrected by size	-1		0.31561	0.111111
UNPAIRED	WOS:000325995900005	2013	2013	Henderson, Lindsay J. and Heidinger, Britt J. and Evans, Neil P. and Arnold, Kathryn E.	Cyanistes caeruleus	Blue tit			correlational	plumage crown	UV reflectance	Fitness	reproductive success	number of fledglings	1		0.241104	0.1
UNPAIRED	WOS:000325995900005	2013	2013	Henderson, Lindsay J. and Heidinger, Britt J. and Evans, Neil P. and Arnold, Kathryn E.	Cyanistes caeruleus	Blue tit			correlational	plumage crown	UV reflectance	Fitness	timing of breeding	laying date	-1		-0.170893	0.100504
UNPAIRED	WOS:000345617300004	2014	2014	Lopez-Arrabe, Jimena and Cantarero, Alejandro and Perez-Rodriguez, Lorenzo and Palma, Antonio and Moreno, Juan	Ficedula hypoleuca	Pied flycatcher			correlational	plumage forehead patch	size	Body Condition	stress	oxidative stress	-1		0.0743523	0.235702
UNPAIRED	WOS:000345617300004	2014	2014	Lopez-Arrabe, Jimena and Cantarero, Alejandro and Perez-Rodriguez, Lorenzo and Palma, Antonio and Moreno, Juan	Ficedula hypoleuca	Pied flycatcher			correlational	plumage wing patch	size	Body Condition	stress	oxidative stress	-1		0.0788535	0.235702
UNPAIRED	WOS:000345617300004	2014	2014	Lopez-Arrabe, Jimena and Cantarero, Alejandro and Perez-Rodriguez, Lorenzo and Palma, Antonio and Moreno, Juan	Ficedula hypoleuca	Pied flycatcher			correlational	plumage forehead patch	size	Body Condition	stress	antioxidant defence	1		0.218485	0.258199
UNPAIRED	WOS:000345617300004	2014	2014	Lopez-Arrabe, Jimena and Cantarero, Alejandro and Perez-Rodriguez, Lorenzo and Palma, Antonio and Moreno, Juan	Ficedula hypoleuca	Pied flycatcher			correlational	plumage wing patch	size	Body Condition	stress	antioxidant defence	1		-0.688267	0.258199
UNPAIRED	WOS:000345617300004	2014	2014	Lopez-Arrabe, Jimena and Cantarero, Alejandro and Perez-Rodriguez, Lorenzo and Palma, Antonio and Moreno, Juan	Ficedula hypoleuca	Pied flycatcher			correlational	plumage forehead patch	size	Body Condition	stress	antioxidant defence	1		-0.481857	0.213201
UNPAIRED	WOS:000345617300004	2014	2014	Lopez-Arrabe, Jimena and Cantarero, Alejandro and Perez-Rodriguez, Lorenzo and Palma, Antonio and Moreno, Juan	Ficedula hypoleuca	Pied flycatcher			correlational	plumage wing patch	size	Body Condition	stress	antioxidant defence	1		-0.142885	0.213201
UNPAIRED	WOS:000345617300004	2014	2014	Lopez-Arrabe, Jimena and Cantarero, Alejandro and Perez-Rodriguez, Lorenzo and Palma, Antonio and Moreno, Juan	Ficedula hypoleuca	Pied flycatcher			correlational	plumage forehead patch	size	Body Condition	stress	oxidative stress	-1		-0.00519873	0.152499
UNPAIRED	WOS:000345617300004	2014	2014	Lopez-Arrabe, Jimena and Cantarero, Alejandro and Perez-Rodriguez, Lorenzo and Palma, Antonio and Moreno, Juan	Ficedula hypoleuca	Pied flycatcher			correlational	plumage forehead patch	size	Body Condition	stress	antioxidant defence		-1			0.0413921	0.196116
UNPAIRED	WOS:000345617300004	2014	2014	Lopez-Arrabe, Jimena and Cantarero, Alejandro and Perez-Rodriguez, Lorenzo and Palma, Antonio and Moreno, Juan	Ficedula hypoleuca	Pied flycatcher			correlational	plumage wing patch	size	Body Condition	stress	oxidative stress	-1		-0.211567	0.152499
UNPAIRED	WOS:000345617300004	2014	2014	Lopez-Arrabe, Jimena and Cantarero, Alejandro and Perez-Rodriguez, Lorenzo and Palma, Antonio and Moreno, Juan	Ficedula hypoleuca	Pied flycatcher			correlational	plumage wing patch	size	Body Condition	stress	antioxidant defence		-1			-0.426884	0.196116
UNPAIRED	WOS:000345617300004	2014	2014	Lopez-Arrabe, Jimena and Cantarero, Alejandro and Perez-Rodriguez, Lorenzo and Palma, Antonio and Moreno, Juan	Ficedula hypoleuca	Pied flycatcher			correlational	plumage forehead patch	size	Body Condition	stress	antioxidant defence	1		0.489491	0.179605
UNPAIRED	WOS:000345617300004	2014	2014	Lopez-Arrabe, Jimena and Cantarero, Alejandro and Perez-Rodriguez, Lorenzo and Palma, Antonio and Moreno, Juan	Ficedula hypoleuca	Pied flycatcher			correlational	plumage forehead patch	size	Body Condition	stress	antioxidant defence		1			0.433954	0.213201
UNPAIRED	WOS:000345617300004	2014	2014	Lopez-Arrabe, Jimena and Cantarero, Alejandro and Perez-Rodriguez, Lorenzo and Palma, Antonio and Moreno, Juan	Ficedula hypoleuca	Pied flycatcher			correlational	plumage wing patch	size	Body Condition	stress	antioxidant defence	1		0.124895	0.179605
UNPAIRED	WOS:000345617300004	2014	2014	Lopez-Arrabe, Jimena and Cantarero, Alejandro and Perez-Rodriguez, Lorenzo and Palma, Antonio and Moreno, Juan	Ficedula hypoleuca	Pied flycatcher			correlational	plumage wing patch	size	Body Condition	stress	antioxidant defence		1			0.388217	0.213201
PAIRED	WOS:000345617300004	2014	2014	Lopez-Arrabe, Jimena and Cantarero, Alejandro and Perez-Rodriguez, Lorenzo and Palma, Antonio and Moreno, Juan	Ficedula hypoleuca	Pied flycatcher	2.14144	0.134281	correlational	plumage forehead patch	size	Body Condition	stress	antioxidant defence	1	1	0.0146857	0.133631	0.26909	0.188982
PAIRED	WOS:000345617300004	2014	2014	Lopez-Arrabe, Jimena and Cantarero, Alejandro and Perez-Rodriguez, Lorenzo and Palma, Antonio and Moreno, Juan	Ficedula hypoleuca	Pied flycatcher	3.82907	0.187009	correlational	plumage wing patch	size	Body Condition	stress	antioxidant defence	1	1	0.154306	0.133631	0.539914	0.188982
PAIRED	WOS:000403146600013	2017	2017	Sepp, Tuul and Rattiste, Kalev and Saks, Lauri and Meitern, Richard and Urvik, Janek and Kaasik, Ants and Horak, Peeter	Larus canus	Common gull	0.588478	0.0969489	correlational	plumage wing patch	size	Body Condition	body condition	feather quality or condition	-1	-1	-0.213171	0.0980581	-0.115511	0.0949158
PAIRED	WOS:000435940700021	2018	2018	Losdat, Sylvain and Blount, Jonathan D. and Marri, Viviana and Maronde, Lea and Richner, Heinz and Helfenstein, Fabrice	Parus major	Great tit	0.860846	0.524577	experimental	plumage breast	colour intensity	Body Condition	stress	oxidative stress	1	1	0.844686	0.301511	-0.0439858	0.213201
UNPAIRED	WOS:000475972600011	2019	2019	Slevin, Morgan C. and Bulluck, Lesley P. and Matthews, Alix. E. and Boves, Than J.	Protonotaria citrea	Prothonotary warbler			correlational	plumage crown	carotenoid content	Fitness	reproductive success	number of fledglings	-1		-0.415521	0.0813788
UNPAIRED	WOS:000475972600011	2019	2019	Slevin, Morgan C. and Bulluck, Lesley P. and Matthews, Alix. E. and Boves, Than J.	Protonotaria citrea	Prothonotary warbler			correlational	plumage breast	carotenoid content	Fitness	reproductive success	number of eggs	-1		-0.388264	0.0813788
UNPAIRED	WOS:000475972600011	2019	2019	Slevin, Morgan C. and Bulluck, Lesley P. and Matthews, Alix. E. and Boves, Than J.	Protonotaria citrea	Prothonotary warbler			correlational	plumage crown	carotenoid content	Fitness	reproductive success	number of eggs	-1		-0.276599	0.0813788
UNPAIRED	WOS:000475972600011	2019	2019	Slevin, Morgan C. and Bulluck, Lesley P. and Matthews, Alix. E. and Boves, Than J.	Protonotaria citrea	Prothonotary warbler			correlational	plumage crown	colour intensity	Fitness	reproductive success	number of eggs	1		0.17602	0.0813788
UNPAIRED	WOS:000475972600011	2019	2019	Slevin, Morgan C. and Bulluck, Lesley P. and Matthews, Alix. E. and Boves, Than J.	Protonotaria citrea	Prothonotary warbler			correlational	plumage breast	colour intensity	Fitness	reproductive success	number of eggs	1		0.103027	0.0813788
UNPAIRED	WOS:000475972600011	2019	2019	Slevin, Morgan C. and Bulluck, Lesley P. and Matthews, Alix. E. and Boves, Than J.	Protonotaria citrea	Prothonotary warbler			correlational	plumage crown	carotenoid content	Fitness	parental quality	visiting rate	-1		-0.0618245	0.164399
UNPAIRED	WOS:000475972600011	2019	2019	Slevin, Morgan C. and Bulluck, Lesley P. and Matthews, Alix. E. and Boves, Than J.	Protonotaria citrea	Prothonotary warbler			correlational	plumage crown	carotenoid content	Fitness	parental quality	visiting rate	-1		0.0362905	0.19245
UNPAIRED	WOS:000475972600011	2019	2019	Slevin, Morgan C. and Bulluck, Lesley P. and Matthews, Alix. E. and Boves, Than J.	Protonotaria citrea	Prothonotary warbler			correlational	plumage crown	colour intensity	Fitness	parental quality	visiting rate	1		0.0607069	0.162221
UNPAIRED	WOS:000475972600011	2019	2019	Slevin, Morgan C. and Bulluck, Lesley P. and Matthews, Alix. E. and Boves, Than J.	Protonotaria citrea	Prothonotary warbler			correlational	plumage crown	colour intensity	Fitness	parental quality	visiting rate	1		0.101356	0.196116
UNPAIRED	WOS:000475972600011	2019	2019	Slevin, Morgan C. and Bulluck, Lesley P. and Matthews, Alix. E. and Boves, Than J.	Protonotaria citrea	Prothonotary warbler			correlational	plumage crown	carotenoid content	Fitness	survival	survival	-1		0.458145	0.147442
UNPAIRED	WOS:000475972600011	2019	2019	Slevin, Morgan C. and Bulluck, Lesley P. and Matthews, Alix. E. and Boves, Than J.	Protonotaria citrea	Prothonotary warbler			correlational	plumage breast	carotenoid content	Fitness	reproductive success	nest survival	-1		0.175792	0.09245
UNPAIRED	WOS:000475972600011	2019	2019	Slevin, Morgan C. and Bulluck, Lesley P. and Matthews, Alix. E. and Boves, Than J.	Protonotaria citrea	Prothonotary warbler			correlational	plumage crown	colour intensity	Fitness	reproductive success	nest survival	1		0.49583	0.242536
UNPAIRED	WOS:000220133400006	2004	2004	Ferns, PN and Hinsley, SA and Ferns, PN and Hinsley, SA	Parus major	Great tit			correlational	plumage cheek patch	immaculateness	Fitness	timing of breeding	first egg date	-1		-0.407888	0.125
UNPAIRED	WOS:000220133400006	2004	2004	Ferns, PN and Hinsley, SA and Ferns, PN and Hinsley, SA	Parus major	Great tit			correlational	plumage cheek patch	immaculateness	Fitness	offspring quality or condition	nestling mass		1			0.513819	0.2
UNPAIRED	WOS:000220133400006	2004	2004	Ferns, PN and Hinsley, SA and Ferns, PN and Hinsley, SA	Parus major	Great tit			correlational	plumage cheek patch	size	Fitness	offspring quality or condition	nestling mass		1			0.396995	0.176777
PAIRED	WOS:000174932300004	2002	2002	Childress, RB and Bennun, LA and Childress, RB and Bennun, LA	Phalacrocorax carbo	Great cormorant			correlational	suborbital skin	colour intensity	Fitness	timing of breeding	timing of breeding	-1	-1	-0.331647	0.101535	-0.331647	0.101535
PAIRED	WOS:000174932300004	2002	2002	Childress, RB and Bennun, LA and Childress, RB and Bennun, LA	Phalacrocorax carbo	Great cormorant			correlational	plumage thigh	elaboration	Fitness	timing of breeding	timing of breeding	-1	-1	-0.276864	0.101535	-0.276864	0.101535
PAIRED	WOS:000174932300004	2002	2002	Childress, RB and Bennun, LA and Childress, RB and Bennun, LA	Phalacrocorax carbo	Great cormorant			correlational	plumage head	elaboration	Fitness	timing of breeding	timing of breeding	-1	-1	-0.213171	0.101535	-0.213171	0.101535
PAIRED	WOS:000174932300004	2002	2002	Childress, RB and Bennun, LA and Childress, RB and Bennun, LA	Phalacrocorax carbo	Great cormorant			correlational	plumage ventral	colour intensity	Fitness	timing of breeding	timing of breeding	-1	-1	-0.161387	0.101535	-0.161387	0.101535
PAIRED	WOS:000174932300004	2002	2002	Childress, RB and Bennun, LA and Childress, RB and Bennun, LA	Phalacrocorax carbo	Great cormorant			correlational	gular skin	colour	Fitness	timing of breeding	timing of breeding	-1	-1	-0.0200027	0.101535	-0.234189	0.101535
PAIRED	WOS:A1997WU11100009	1997	1997	Fitzpatrick, S and Price, P and Fitzpatrick, S and Price, P	Pica pica	Magpie	1.24945	0.41371	correlational	plumage tail	condition	Fitness	timing of breeding	fledging date	-1	-1	0.296678	0.377964	0.0363582	0.377964
PAIRED	WOS:A1997WU11100009	1997	1997	Fitzpatrick, S and Price, P and Fitzpatrick, S and Price, P	Pica pica	Magpie	1.24945	0.41371	correlational	plumage tail	condition	Fitness	timing of breeding	nesting date	-1	-1	-0.0656822	0.353553	-0.308648	0.353553
UNPAIRED	WOS:A1993NM70700017	1993	1993	HILL, GE and HILL, GE	Carpodacus mexicanus	House finch			correlational	plumage composite	brightness	Body Condition	body condition	mass corrected by size	1		0.0852056	0.162221
UNPAIRED	WOS:A1993NM70700017	1993	1993	HILL, GE and HILL, GE	Carpodacus mexicanus	House finch			correlational	plumage composite	brightness	Fitness	timing of breeding	nesting date	-1		-0.100335	0.113961
UNPAIRED	WOS:A1993NM70700017	1993	1993	HILL, GE and HILL, GE	Carpodacus mexicanus	House finch			correlational	plumage composite	brightness	Fitness	reproductive success	clutch size	1		-0.120581	0.158114
UNPAIRED	WOS:A1993NM70700017	1993	1993	HILL, GE and HILL, GE	Carpodacus mexicanus	House finch			correlational	plumage composite	brightness	Fitness	reproductive success	number of fledglings	1		-0.120581	0.179605
UNPAIRED	WOS:A1993NM70700017	1993	1993	HILL, GE and HILL, GE	Carpodacus mexicanus	House finch			correlational	plumage composite	brightness	Fitness	reproductive success	proportion fledged	1		-0.0600722	0.179605
UNPAIRED	WOS:A1993NM70700017	1993	1993	HILL, GE and HILL, GE	Carpodacus mexicanus	House finch			correlational	plumage composite	brightness	Fitness	survival	return rate	1		0.180768	0.122169
UNPAIRED	male20	1990	1990	HILL, GE	Carpodacus mexicanus	House finch			correlational	plumage composite	brightness	Fitness	reproductive success	mating success		1			0.118942	0.0686803
UNPAIRED	male21	1991	1991	HILL, GE	Carpodacus mexicanus	House finch			correlational	plumage composite	brightness	Fitness	parental quality	feeding (visits) rate		1			0.447692	0.185695
UNPAIRED	male21	1991	1991	HILL, GE	Carpodacus mexicanus	House finch			correlational	plumage composite	brightness	Fitness	survival	return		1			0.136031	0.0824786
UNPAIRED	male21	1991	1991	HILL, GE	Carpodacus mexicanus	House finch			correlational	plumage composite	brightness	Fitness	survival	return		1			0.168271	0.0691714
UNPAIRED	WOS:000088488200003	2000	2000	Jones, IL and Hunter, FM and Fraser, G and Jones, IL and Hunter, FM and Fraser, G	Aethia cristatella	Crested auklet			correlational	plumage crest	size	Body Condition	body condition	mass corrected by size (residuals)	1		0.234189	0.0916698
UNPAIRED	WOS:000088488200003	2000	2000	Jones, IL and Hunter, FM and Fraser, G and Jones, IL and Hunter, FM and Fraser, G	Aethia cristatella	Crested auklet			correlational	plumage auricular plume	size	Body Condition	body condition	mass corrected by size (residuals)		1			0.181983	0.0745356
UNPAIRED	WOS:000071789700013	1998	1998	Linville, SU and Breitwisch, R and Schilling, AJ and Linville, SU and Breitwisch, R and Schilling, AJ	Cardinalis cardinalis	Northern cardinal			correlational	plumage wing	colour	Fitness	parental quality	feeding rate	1		0.105665	0.267261
UNPAIRED	WOS:000071789700013	1998	1998	Linville, SU and Breitwisch, R and Schilling, AJ and Linville, SU and Breitwisch, R and Schilling, AJ	Cardinalis cardinalis	Northern cardinal			correlational	plumage body	extent	Fitness	parental quality	feeding rate	1		-0.0696574	0.267261
UNPAIRED	WOS:000071789700013	1998	1998	Linville, SU and Breitwisch, R and Schilling, AJ and Linville, SU and Breitwisch, R and Schilling, AJ	Cardinalis cardinalis	Northern cardinal			correlational	plumage breast	colour	Fitness	parental quality	feeding rate		1			0.0902471	0.267261
UNPAIRED	WOS:A1989AJ00400003	1989	1989	MUMA, KE and WEATHERHEAD, PJ and MUMA, KE and WEATHERHEAD, PJ	Agelaius phoeniceus	Red-winged blackbird			correlational	plumage wing	brightness	Fitness	timing of breeding	clutch initiation date	1		0.253281	0.109109
UNPAIRED	WOS:A1989AJ00400003	1989	1989	MUMA, KE and WEATHERHEAD, PJ and MUMA, KE and WEATHERHEAD, PJ	Agelaius phoeniceus	Red-winged blackbird			correlational	plumage throat	brightness	Fitness	timing of breeding	clutch initiation date	1		0.185085	0.109109
UNPAIRED	male22	1987	1987	Eckert, CG, and Weatherhead, PJ	Agelaius phoeniceus	Red-winged blackbird			correlational	plumage wing	size	Fitness	parental quality	nestling defense		1			0.584599	0.333333
UNPAIRED	male22	1987	1987	Eckert, CG, and Weatherhead, PJ	Agelaius phoeniceus	Red-winged blackbird			correlational	plumage wing	size	Fitness	parental quality	nestling defense		1			0.260753	0.447214
UNPAIRED	male22	1987	1987	Eckert, CG, and Weatherhead, PJ	Agelaius phoeniceus	Red-winged blackbird			correlational	plumage wing	size	Fitness	parental quality	nestling defense		1			0.606983	0.447214
UNPAIRED	male22	1987	1987	Eckert, CG, and Weatherhead, PJ	Agelaius phoeniceus	Red-winged blackbird			correlational	plumage wing	size	Fitness	parental quality	nestling defense		1			0.777032	0.447214
UNPAIRED	male22	1987	1987	Eckert, CG, and Weatherhead, PJ	Agelaius phoeniceus	Red-winged blackbird			correlational	plumage wing	size	Fitness	parental quality	nestling defense		1			1.66584	0.447214
UNPAIRED	male22	1987	1987	Eckert, CG, and Weatherhead, PJ	Agelaius phoeniceus	Red-winged blackbird			correlational	plumage wing	size	Fitness	parental quality	nestling defense		1			0.789278	0.447214
UNPAIRED	WOS:A1993KZ71200006	1993	1993	MOLLER, AP and MOLLER, AP	Hirundo rustica	Barn swallow			correlational	plumage tail	size	Fitness	reproductive success	mating success	1		2.33965	0.0543125
UNPAIRED	WOS:A1993KZ71200006	1993	1993	MOLLER, AP and MOLLER, AP	Hirundo rustica	Barn swallow			correlational	plumage tail	size	Fitness	reproductive success	number of fledglings	1		1.24579	0.0547997
UNPAIRED	male23	1988	1988	MOLLER, AP	Hirundo rustica	Barn swallow			experimental	plumage tail	size	Fitness	reproductive success	intra-pair copulation rate		1			-0.148219	0.229416
UNPAIRED	male23	1988	1988	MOLLER, AP	Hirundo rustica	Barn swallow			experimental	plumage tail	size	Fitness	reproductive success	extra-pair copulation rate		1			0.789432	0.229416
UNPAIRED	male23	1988	1988	MOLLER, AP	Hirundo rustica	Barn swallow			experimental	plumage tail	size	Fitness	reproductive success	mates extra-pair copulation rate		-1			-0.789432	0.229416
UNPAIRED	male24	1992	1992	MOLLER, AP	Hirundo rustica	Barn swallow			correlational	plumage tail	size	Fitness	reproductive success	mating success		1			0.217376	0.0574485
UNPAIRED	male24	1992	1992	MOLLER, AP	Hirundo rustica	Barn swallow			correlational	plumage tail	size	Fitness	reproductive success	extra-pair copulation success		1			0.386808	0.0795557
UNPAIRED	male24	1992	1992	MOLLER, AP	Hirundo rustica	Barn swallow			correlational	plumage tail	size	Fitness	reproductive success	mates extra-pair copulation success		1			0.333284	0.121268
UNPAIRED	male24	1992	1992	MOLLER, AP	Hirundo rustica	Barn swallow			correlational	plumage tail	size	Fitness	survival	aparrent survival (gone)		1			0.0345334	0.0467269
UNPAIRED	male24	1992	1992	MOLLER, AP	Hirundo rustica	Barn swallow			correlational	plumage tail	size	Fitness	timing of breeding	laying date		-1			-0.466981	0.0622573
UNPAIRED	male24	1992	1992	MOLLER, AP	Hirundo rustica	Barn swallow			correlational	plumage tail	size	Fitness	reproductive success	clutch size		1			0.216211	0.0622573
UNPAIRED	male24	1992	1992	MOLLER, AP	Hirundo rustica	Barn swallow			correlational	plumage tail	size	Fitness	reproductive success	brood size at fledging		1			0.281909	0.0622573
UNPAIRED	male24	1992	1992	MOLLER, AP	Hirundo rustica	Barn swallow			correlational	plumage tail	size	Fitness	offspring quality or condition	nestling tarsus length		1			0.411252	0.0622573
UNPAIRED	male24	1992	1992	MOLLER, AP	Hirundo rustica	Barn swallow			correlational	plumage tail	size	Fitness	offspring quality or condition	nestling mass		1			0.166627	0.0622573
UNPAIRED	male24	1992	1992	MOLLER, AP	Hirundo rustica	Barn swallow			correlational	plumage tail	size	Fitness	reproductive success	clutch size		1			0.0664237	0.09245
UNPAIRED	male24	1992	1992	MOLLER, AP	Hirundo rustica	Barn swallow			correlational	plumage tail	size	Fitness	reproductive success	brood size at fledging		1			0.16207	0.09245
UNPAIRED	male24	1992	1992	MOLLER, AP	Hirundo rustica	Barn swallow			correlational	plumage tail	size	Fitness	offspring quality or condition	nestling tarsus length		1			-0.576963	0.09245
UNPAIRED	male24	1992	1992	MOLLER, AP	Hirundo rustica	Barn swallow			correlational	plumage tail	size	Fitness	offspring quality or condition	nestling mass		1			0.202556	0.09245
UNPAIRED	male24	1992	1992	MOLLER, AP	Hirundo rustica	Barn swallow			correlational	plumage tail	size	Fitness	reproductive success	number of fledglings		1			0.221482	0.0514344
PAIRED	WOS:000169227800005	2001	2001	Piersma, T and Mendes, L and Hennekens, J and Ratiarison, S and Groenewold, S and Jukema, J and Piersma, T and Mendes, L and Hennekens, J and Ratiarison, S and Groenewold, S and Jukema, J	Limosa lapponica	Bar-tailed godwit			correlational	plumage composite	extent	Body Condition	parasites	parasite infection	1	1	0.0940766	0.109109	0	0.111803
PAIRED	WOS:000167402400014	2001	2001	Regosin, JV and Pruett-Jones, S and Regosin, JV and Pruett-Jones, S	Tyrannus forficatus	Scissor-tailed flycatcher	3.00987	0.285043	correlational	plumage tail	size	Fitness	timing of breeding	clutch initiation date	-1	-1	-0.155235	0.188982	-0.445266	0.166667
UNPAIRED	WOS:000166152000015	2001b	2001	Roulin, A and Riols, C and Dijkstra, C and Ducrest, AL and Roulin, A and Riols, C and Dijkstra, C and Ducrest, AL	Tyto alba	Barn owl			correlational	plumage ventral areas (undperparts)	spottiness	Fitness	offspring quality or condition	parasite abundance of brood	-1		-0.423649	0.145865
UNPAIRED	WOS:000166152000015	2001b	2001	Roulin, A and Riols, C and Dijkstra, C and Ducrest, AL and Roulin, A and Riols, C and Dijkstra, C and Ducrest, AL	Tyto alba	Barn owl			correlational	plumage ventral areas (undperparts)	spottiness	Fitness	reproductive success	brood size	1		-0.0100003	0.145865
PAIRED	male25	1998	1998	Roulin, A, Richner, H, and Ducrest, AL	Tyto alba	Barn owl	-0.83829	0.126717	experimental	plumage ventral areas (underparts)	spottiness	Body Condition	body condition	brood size manipulation	-1	-1	-0.0334189	0.188982	-0.123241	0.2
UNPAIRED	WOS:A1997WH63800008	1997	1997	Tella, JL and Forero, MG and Donazar, JA and Hiraldo, F and Tella, JL and Forero, MG and Donazar, JA and Hiraldo, F	Falco naumanni	Lesser kestrel			correlational	plumage rump	colouration	Fitness	timing of breeding	laying date	-1		-0.0200027	0.0790569
UNPAIRED	WOS:A1997WH63800008	1997	1997	Tella, JL and Forero, MG and Donazar, JA and Hiraldo, F and Tella, JL and Forero, MG and Donazar, JA and Hiraldo, F	Falco naumanni	Lesser kestrel			correlational	plumage rump	colouration	Fitness	reproductive success	clutch size	1		0.0500417	0.0932505
UNPAIRED	WOS:A1997WH63800008	1997	1997	Tella, JL and Forero, MG and Donazar, JA and Hiraldo, F and Tella, JL and Forero, MG and Donazar, JA and Hiraldo, F	Falco naumanni	Lesser kestrel			correlational	plumage rump	colouration	Fitness	reproductive success	number of hatchlings	1		0.110447	0.1
UNPAIRED	WOS:A1997WH63800008	1997	1997	Tella, JL and Forero, MG and Donazar, JA and Hiraldo, F and Tella, JL and Forero, MG and Donazar, JA and Hiraldo, F	Falco naumanni	Lesser kestrel			correlational	plumage rump	colouration	Fitness	reproductive success	number of fledglings	1		-0.030009	0.0916698
UNPAIRED	WOS:A1997WH63800008	1997	1997	Tella, JL and Forero, MG and Donazar, JA and Hiraldo, F and Tella, JL and Forero, MG and Donazar, JA and Hiraldo, F	Falco naumanni	Lesser kestrel			correlational	plumage rump	colouration	Fitness	parental quality	feeding rate	1		0.194179	0.218218
UNPAIRED	WOS:A1997WH63800008	1997	1997	Tella, JL and Forero, MG and Donazar, JA and Hiraldo, F and Tella, JL and Forero, MG and Donazar, JA and Hiraldo, F	Falco naumanni	Lesser kestrel			correlational	plumage tail	colouration	Fitness	parental quality	feeding rate	1		0.27765	0.218218
UNPAIRED	WOS:A1997WH63800008	1997	1997	Tella, JL and Forero, MG and Donazar, JA and Hiraldo, F and Tella, JL and Forero, MG and Donazar, JA and Hiraldo, F	Falco naumanni	Lesser kestrel			correlational	plumage rump	colouration	Body Condition	body condition	mass corrected by size (residuals)	1		0.0963006	0.0798087
UNPAIRED	WOS:A1997WH63800008	1997	1997	Tella, JL and Forero, MG and Donazar, JA and Hiraldo, F and Tella, JL and Forero, MG and Donazar, JA and Hiraldo, F	Falco naumanni	Lesser kestrel			correlational	plumage tail	colouration	Body Condition	body condition	mass corrected by size (residuals)	1		0.00395284	0.0798087
UNPAIRED	WOS:A1997WH63800008	1997	1997	Tella, JL and Forero, MG and Donazar, JA and Hiraldo, F and Tella, JL and Forero, MG and Donazar, JA and Hiraldo, F	Falco naumanni	Lesser kestrel			correlational	plumage rump	colouration	Fitness	survival	aparrent survival (gone)	1		0.100975	0.0655122
UNPAIRED	WOS:A1997WH63800008	1997	1997	Tella, JL and Forero, MG and Donazar, JA and Hiraldo, F and Tella, JL and Forero, MG and Donazar, JA and Hiraldo, F	Falco naumanni	Lesser kestrel			correlational	plumage tail	colouration	Fitness	survival	aparrent survival (gone)	1		0.10817	0.0655122
PAIRED	WOS:000086623700030	2000	2000	Wiebe, KL and Wiebe, KL	Colaptes auratus	Northern flicker	0.157647	0.208862	correlational	plumage composite	colour	Fitness	timing of breeding	laying date	-1	-1	0.331647	0.125988	0.331647	0.127

## Sheet: Readme
data_type	Whether the effect sizes regarding the specific parameters investigated were available for both males and females ("PAIRED") or not ("UNPAIRED")
unique_indentifiers	Unique codes given to studies
year_code	Study publication year as it appears in the references of supplementary materials (e.g., 2020a, 2020b)
year	Study publication year as numeric (without letters)
authors	Study authorship
scientific_names	Scientific names following the the Birds of the World online database (Billerman et al. 2020)
common_names	Common names following the the Birds of the World online database (Billerman et al. 2020)
dimorphism_Cohend	Effect sizes (Cohen's d) for sexual dimorphism. Males versus females with positive values indicating tendency for male-biased dimorphism and negative values tendency for female-biased dimorphism.
dimorphism_CohendSE	Standard errors of Cohen's d effect sizes for sexual dimorphism
study_type	Whether the study was correlational or experimental
trait	Ornament investigated
trait_parameter	Specific feature of the ornament investigated
overall_parameter	Whether the associations between ornaments and parameters of "Body condition" or "Fitness" were investigated
specific_parameter	Specific parameters of "Body condition" and "Fitness" investigated
detail_notes	Some detailed notes on the specific parameters investigated
good_fem	Sign correction indicating positive associations between ornamentation and body condition or fitness parameters in females. This value was multiplied by values in the "zr_fem" column to run the analyses
good_male	Sign correction indicating positive associations between ornamentation and body condition or fitness parameters in females. This value was multiplied by values in the "zr_male" column to run the analyses
zr_values	Zr effect sizes for the associations between ornamentation and body condition and fitness parameters
zr_se	Standard errors of Zr effect sizes
zr_fem	Zr effect sizes for the associations between ornamentation and body condition and fitness parameters in females
zr_se_fem	Standard errors of Zr effect sizes in females
zr_male	Zr effect sizes for the associations between ornamentation and body condition and fitness parameters in males
zr_se_male	Standard errors of Zr effect sizes in males
sex	whether data is from females or males
N, slope, slope.se, t, zr,…	statistics extracted before calculation effect sizes (zr)
data_extraction	whether data was extracted from "published data" (i.e. directly from statistics or from data provided in supplementary material), figures, or provided by the authors (in litt.). Sometimes there was more than one source because the direction of the effects was not reported in the text, sample sizes or point values for effect sizes (e.g. published data/figure, published data/provided by authors).
