# Supplementary material for: Ornaments are equally informative in males and females: a bivariate meta-analysis in birds
Source: Research Square preprint supplement (doi:10.21203/rs.3.rs-1141520/v1), 2021-12-15
Supplement: Supplementary file 3 [file 96af565b8bb8677af82e2c2b.docx]

**Supplementary Materials**

**849 unique records on 12 June 2019**

**SEARCH 1:** *Web of Science*

TOPIC: (“female ornament*” OR “mutual* ornament*”)

Timespan: All years

Databases: WOS, BIOABS, BIOSIS, CCC, DRCI, KJD, MEDLINE, RSCI, SCIELO

**SEARCH 2:** References from five highly cited articles in the topic and all publications citing those five articles

Amundsen T. 2000. *Trends Ecol. Evol.* **15**, 149–155

LeBas NR. *et al.* 2003. *Proc. R. Soc. Lond. B* **270**, 2159–2165

LeBas NR. 2006. *Trends Ecol. Evol.* **21**, 170–173

Kraaijeveld K. *et al.* 2007. *Anim. Behav*. **74**, 657–677

Tobias JA. *et al.* 2012. *Philos. Trans. R. Soc. Lond. B* **367,** 2274–2293

**EXCLUSION criteria:**

- Data files (29)
- Analysis scripts (5)
- Conference documents (9)
- Reviews (53)
- Theoretical studies (20)
- Comments and editorial articles (34)
- Book or book chapters (16)
- Comparative studies (81)
- Papers on methods (2)
- Taxonomic studies (2)
- Descriptive studies (16)
- Artificial selection (4)
- Male only studies (35)
- Genetic architecture (7)
- Genetic correlation (4)
- Mechanism (14)
- Mating system (4)
- Non-morphological traits (86)
- Non-ornamental traits (40)
- Species recognition (3)
- Fossil records (3)
- Human studies (11)
- Assortative mating (9)
- Other unrelated topics (53)

**Total exclusions = 540**

**309 records**

(Title and abstract screening)

**INCLUSION criteria:**

- Peer-reviewed articles
- Birds
- Species in which both sexes are ornamented
- Ornament ↔ fitness/condition

**25 additional peer-reviewed articles on males with extractable data**

**INCLUSION criteria:**

- Same inclusion criteria as above
- Cited in studies on female ornaments only (from the studies selected previously)
- From the same populations as those studies on females citing them

**125 records**

(Full-text screened studies with extractable data)

**META-ANALYSIS DATA:**

**150 studies** (64 species)

967 effect sizes

**Figure S1.** PRISMA flowchart of the literature search strategy and study selection process


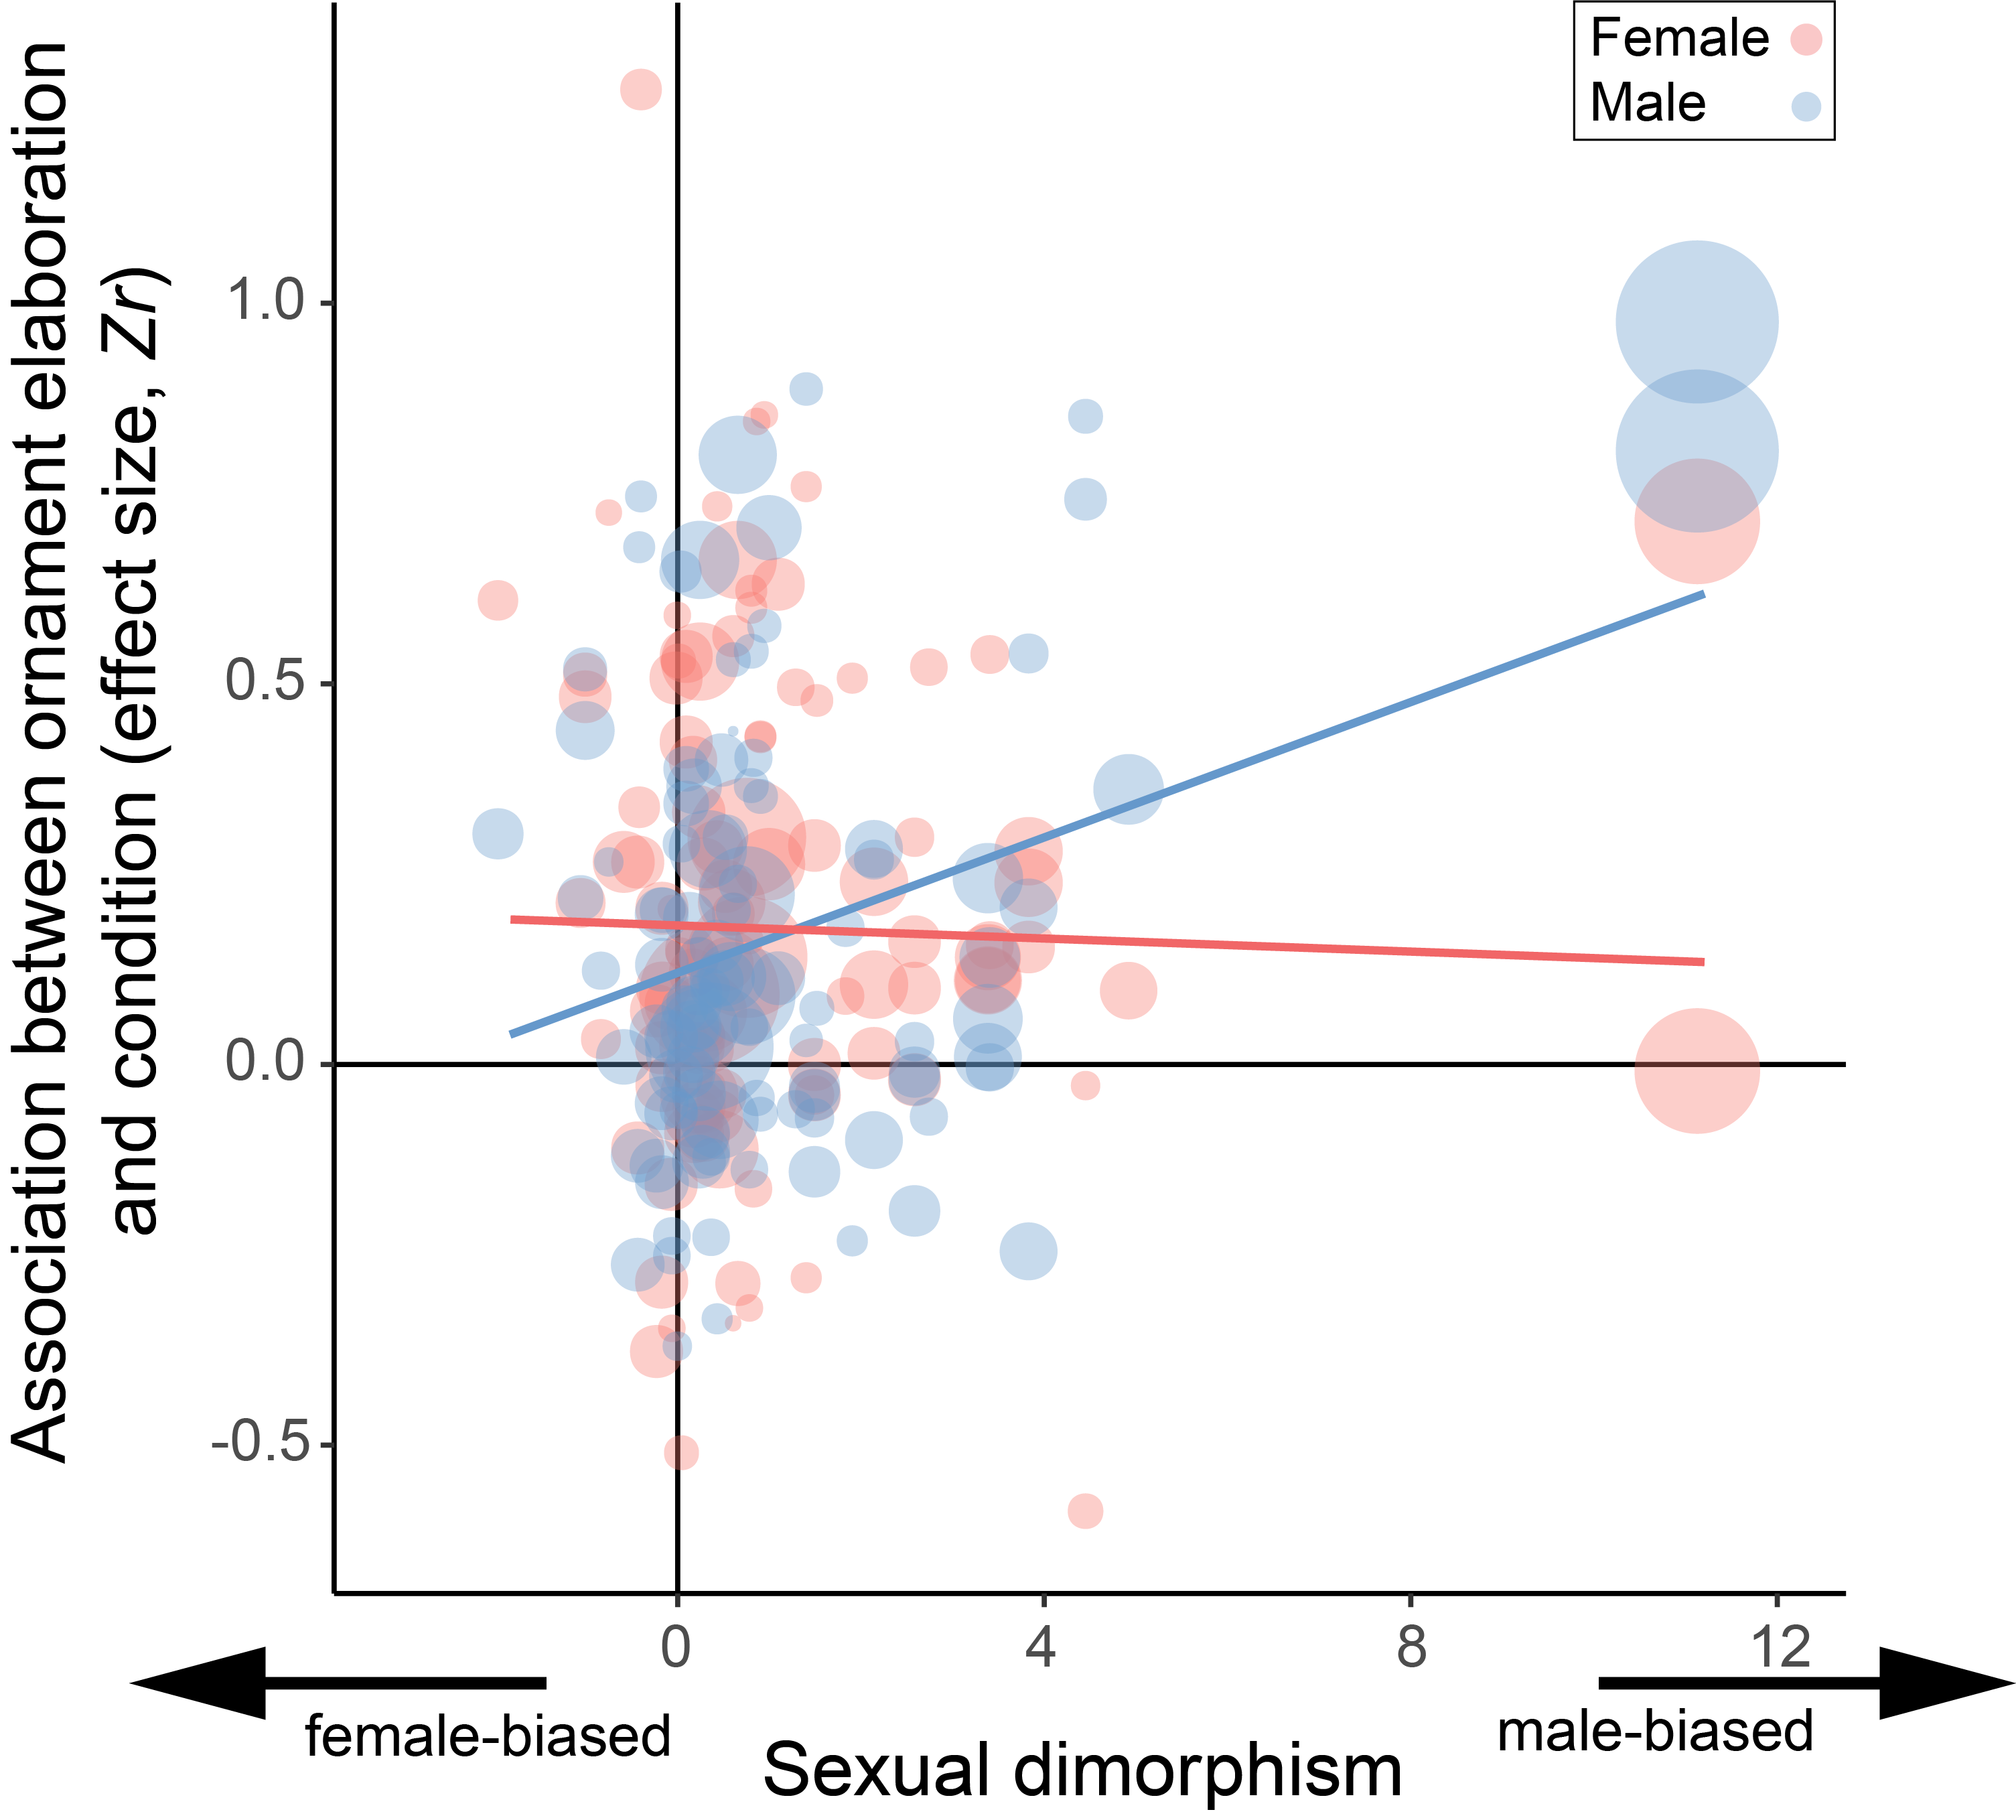


**Figure S2.** Sexual dimorphism seems to affect condition-dependence of ornaments. Shown are the effect sizes of ornament elaboration and body condition per sex. However, a significant effect of sexual dimorphism was only influenced by four outliers corresponding to an extreme case of sexual dimorphism in the Willow Ptarmigan *Lagopus lagopus* (more details in *Results*). The size of the bubbles is proportional to the inverse of the standard errors (often referred to as ‘precision’), thus the larger the bubble the greater the precision of the effect size. Regression lines are plotted by sex based on the posteriori distributions of the model (details in *Methods* and Table S1.7).


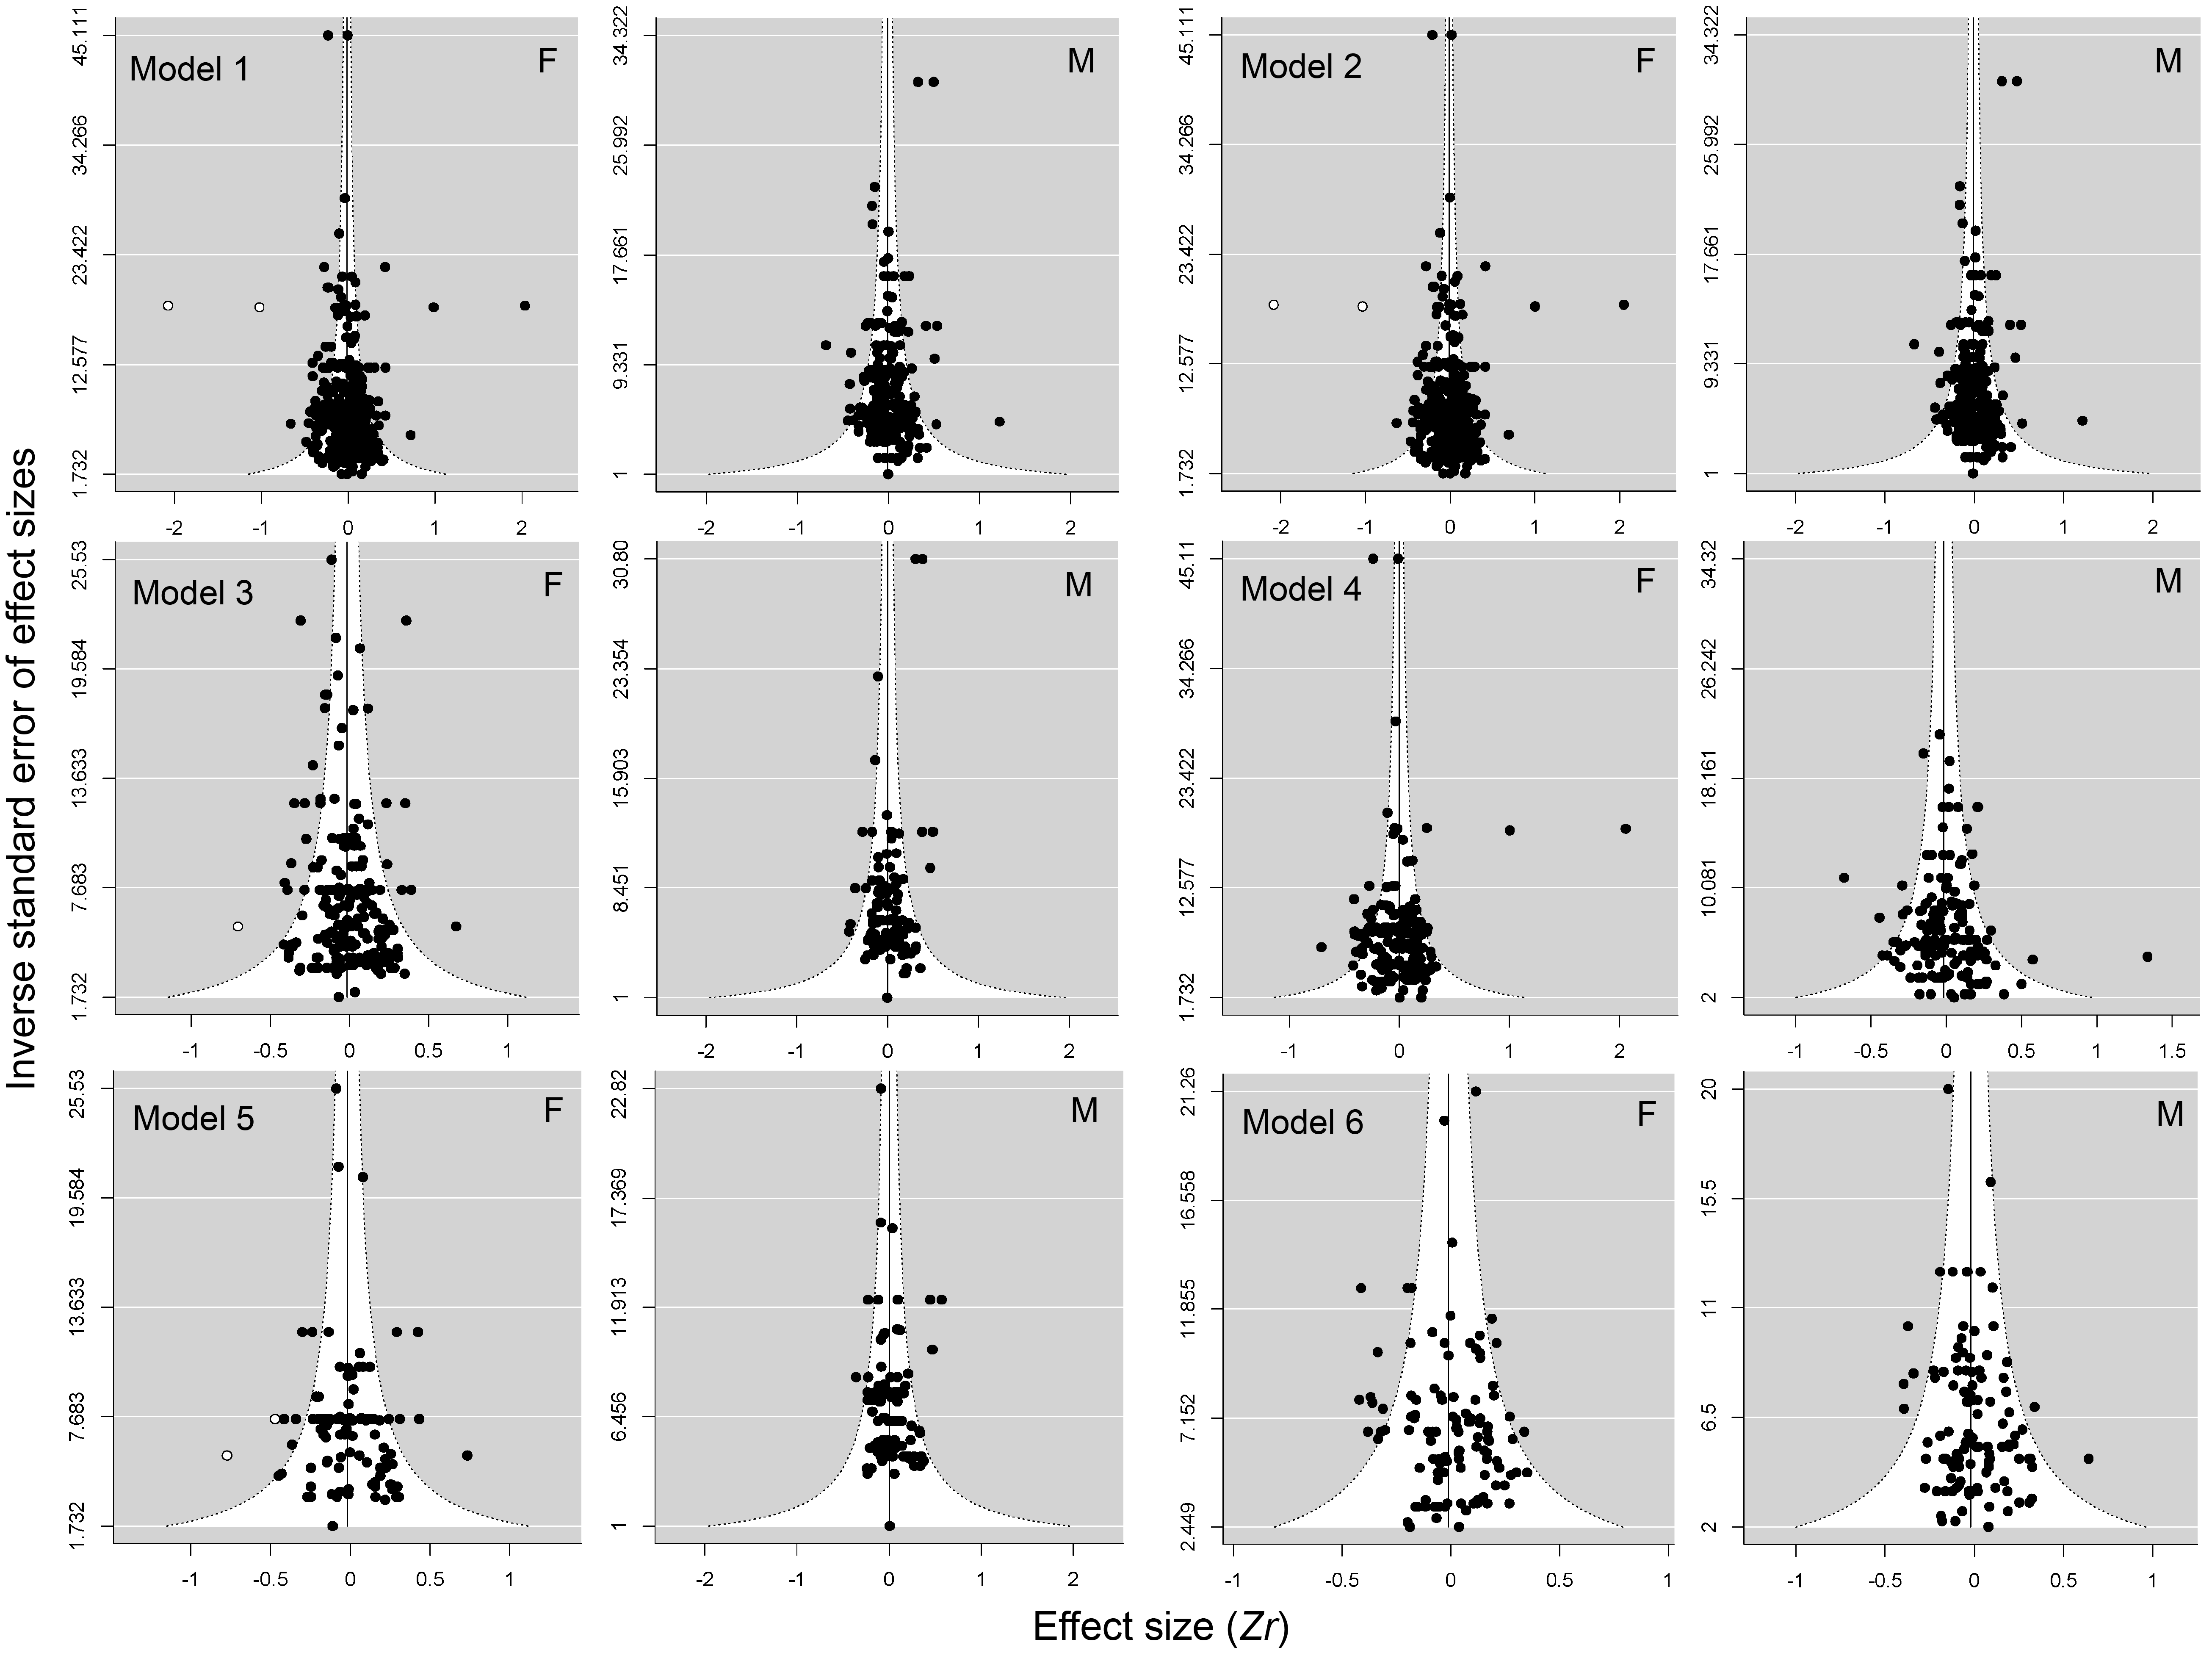


**Figure S3.** Funnel plots for each model data set presented by sex (F: females, M: males). Model numeration according to Table S1. Effect sizes are plotted against the inverse of their standard errors, or precision (1/SE). Each filled dot represents actual effect sizes calculated from our literature compilation, while the empty circles are fabricated effect sizes using the trim-and-fill method to force funnel plots to be symmetric. The mean effect size is defined by the vertical line along with pseudo 95% confidence intervals defined by dotted lines (mean effect size ± 1.96x[1/SE]), which created the funnel shape. In the absence of publication bias, actual effect sizes are expected to lie within this funnel and be evenly distributed on both sides of the vertical line. Deviations from the symmetric funnel shape may indicate publication bias. Results from Egger’s tests to test for funnel asymmetry are shown in Table S5.

**Table S1.** Summary of meta-analysis model parameters along with 95% credible intervals. Reference level in models 2 to 7 for interactions with Sex is ‘female’, in model 2 for Fitness is ‘condition’, in model 3 for Condition parameters is ‘condition’, in model 4 for Fitness parameters is ‘timing of breeding’, and in models 5-7 the Intercept refers to ‘female’.

| **Model** | **Parameter** | **Posterior mean** | **Lower 95% CI** | **Upper 95%CI** | **Effective sample size** |
| --- | --- | --- | --- | --- | --- |
|
|  |
| **1: Sex**  (Condition & Fitness combined) | Female | 0.1885 | 0.1147 | 0.2776 | 5000 |
| Male | 0.2180 | 0.1119 | 0.3320 | 5000 |
| Publication year (centred mean) | -0.0062 | -0.0096 | -0.0028 | 4608 |
| Phylogeny variance (female) | 0.0059 | 2.45x10-10 | 0.0165 | 5000 |
| Phylogeny variance (male) | 0.0132 | 2.25x10-10 | 0.0312 | 4772 |
| Phylogeny covariance (fem/male) | 0.0040 | -0.0028 | 0.0144 | 4279 |
| Species ID variance (female) | 0.0047 | 3.30x10-8 | 0.0123 | 5000 |
| Species ID variance (male) | 0.0034 | 4.26x10-11 | 0.0120 | 4746 |
| Species ID covariance (fem/male) | 0.0011 | -0.0025 | 0.0060 | 5000 |
| Residual variance (female) | 0.0662 | 0.0551 | 0.0775 | 5000 |
| Residual variance (male) | 0.0532 | 0.0429 | 0.0647 | 5000 |
| Residual covariance (fem/male) | 0.0149 | 0.0040 | 0.0258 | 5000 |
| **2: Sex*Condition or Fitness** | Female | 0.2232 | 0.1484 | 0.3021 | 5000 |
| Male | 0.2550 | 0.1558 | 0.3738 | 5000 |
| Fitness | -0.0864 | -0.1474 | -0.0240 | 5433 |
| Sex:Fitness | -0.0135 | -0.0972 | 0.0709 | 5000 |
| Publication year (centred mean) | -0.0072 | -0.0108 | -0.0039 | 5000 |
| Phylogeny variance (female) | 0.0042 | 4.29x10-10 | 0.0134 | 4547 |
| Phylogeny variance (male) | 0.0117 | 2.64x10-9 | 0.0290 | 4585 |
| Phylogeny covariance (fem/male) | 0.0022 | -0.0035 | 0.0106 | 4126 |
| Species ID variance (female) | 0.0051 | 1.94x10-10 | 0.0126 | 5000 |
| Species ID variance (male) | 0.0039 | 3.06x10-11 | 0.0130 | 4503 |
| Species ID covariance (fem/male) | 0.0010 | -0.0028 | 0.0060 | 4798 |
| Residual variance (female) | 0.0652 | 0.0542 | 0.0766 | 4796 |
| Residual variance (male) | 0.0522 | 0.0421 | 0.0628 | 4681 |
| Residual covariance (fem/male) | 0.0137 | 0.0033 | 0.0243 | 5000 |
| **3: Sex*Condition parameters** | Female | 0.1804 | 0.0911 | 0.2848 | 4804 |
| Male | 0.2402 | 0.0843 | 0.4032 | 5000 |
| Body size | 0.0480 | -0.0629 | 0.1524 | 5000 |
| Immunity | 0.0064 | -0.1473 | 0.1604 | 4753 |
| Stress | -0.0226 | -0.1713 | 0.1263 | 5000 |
| Environment | 0.1233 | -0.0767 | 0.3097 | 5000 |
| Parasites | 0.0901 | -0.1388 | 0.3063 | 5000 |
| Sex:Body size | -0.0915 | -0.2580 | 0.0634 | 5000 |
| Sex:Immunity | -0.0248 | -0.2418 | 0.1836 | 4773 |
| Sex:Stress | 0.1533 | -0.0690 | 0.3766 | 5000 |
| Sex:Environment | -0.0454 | -0.2963 | 0.1988 | 5217 |
| Sex:Parasites | -0.1282 | -0.4363 | 0.1602 | 5000 |
| Publication year (centred mean) | -0.0036 | -0.0108 | 0.0035 | 5000 |
| Phylogeny variance (female) | 0.0039 | 1.01x10-10 | 0.0159 | 5000 |
| Phylogeny variance (male) | 0.0200 | 2.87x10-10 | 0.0616 | 4346 |
| Phylogeny covariance (fem/male) | 0.0023 | -0.0063 | 0.0155 | 4715 |
| Species ID variance (female) | 0.0060 | 4.37x10-9 | 0.0181 | 5000 |
| Species ID variance (male) | 0.0133 | 3.07x10-12 | 0.0362 | 4499 |
| Species ID covariance (fem/male) | 0.0033 | -0.0044 | 0.0139 | 4511 |
| Residual variance (female) | 0.0628 | 0.0460 | 0.0800 | 5000 |
| Residual variance (male) | 0.0539 | 0.0401 | 0.0693 | 5000 |
| Residual covariance (fem/male) | 0.0031 | -0.0087 | 0.0148 | 5000 |
| **4: Sex*Fitness parameters** | Female | 0.1437 | -0.0044 | 0.2869 | 5182 |
| Male | 0.1701 | 0.0324 | 0.3169 | 5000 |
| Reproductive success | 0.0375 | -0.0768 | 0.1611 | 5315 |
| Offspring quality/condition | 0.0722 | -0.0700 | 0.2187 | 5000 |
| Parental quality | -0.0712 | -0.2279 | 0.0767 | 5000 |
| Survival | -0.1380 | -0.3007 | 0.0257 | 4745 |
| Sex:Reproductive success | -0.0479 | -0.2156 | 0.1122 | 5000 |
| Sex:Offspring quality/condition | -0.0912 | -0.2941 | 0.1065 | 6587 |
| Sex:Parental quality | 0.0105 | -0.1997 | 0.2031 | 5483 |
| Sex:Survival | 0.0079 | -0.2143 | 0.2457 | 4794 |
| Publication year (centred mean) | -0.0088 | -0.0126 | -0.0045 | 5000 |
| Phylogeny variance (female) | 0.0085 | 3.17 x10-9 | 0.0295 | 5000 |
| Phylogeny variance (male) | 0.0057 | 2.51x10-12 | 0.0201 | 5000 |
| Phylogeny covariance (fem/male) | 0.0009 | -0.0052 | 0.0089 | 5302 |
| Species ID variance (female) | 0.0069 | 9.26x10-9 | 0.0181 | 5000 |
| Species ID variance (male) | 0.0024 | 1.63x10-12 | 0.0095 | 5000 |
| Species ID covariance (fem/male) | 3.97x10-5 | -0.0041 | 0.0040 | 4765 |
| Residual variance (female) | 0.0761 | 0.0613 | 0.0937 | 4515 |
| Residual variance (male) | 0.0661 | 0.0499 | 0.0827 | 5000 |
| Residual covariance (fem/male) | 0.0159 | 0.0014 | 0.0336 | 5000 |
| **5: Sex*Sexual dimorphism** (Condition data only) Removing outliers | Female | 0.2020 | 0.0928 | 0.3245 | 5000 |
| Male | 0.1478 | 0.0236 | 0.2772 | 5000 |
| Dimorphism | -0.0132 | -0.0759 | 0.0428 | 5000 |
| Sex:Dimorphism | 0.0287 | -0.0475 | 0.1072 | 5000 |
| Publication year (centred mean) | -0.0106 | -0.0219 | 0.0005 | 5000 |
| Phylogeny variance (female) | 0.0072 | 1.60x10-10 | 0.0285 | 5000 |
| Phylogeny variance (male) | 0.0107 | 2.55x10-10 | 0.0372 | 5325 |
| Phylogeny covariance (fem/male) | 0.0017 | -0.0060 | 0.0126 | 5000 |
| Species ID variance (female) | 0.0050 | 1.31x10-9 | 0.0195 | 5000 |
| Species ID variance (male) | 0.0072 | 1.23x10-9 | 0.0240 | 4549 |
| Species ID covariance (fem/male) | 0.0009 | -0.0052 | 0.0086 | 5000 |
| Residual variance (female) | 0.0853 | 0.0574 | 0.1156 | 5000 |
| Residual variance (male) | 0.0702 | 0.0470 | 0.0939 | 5662 |
| Residual covariance (fem/male) | 0.0072 | -0.0123 | 0.0274 | 5000 |
| **6: Sex*Sexual dimorphism** (Fitness data only) | Female | 0.1269 | -0.0070 | 0.2713 | 5000 |
| Male | 0.1358 | -0.0222 | 0.2761 | 5000 |
| Dimorphism | 0.0012 | -0.0573 | 0.0596 | 5000 |
| Sex:Dimorphism | -0.0222 | -0.0944 | 0.0545 | 5000 |
| Publication year (centred mean) | -0.0074 | -0.0172 | 0.0012 | 5592 |
| Phylogeny variance (female) | 0.0095 | 2.40x10-9 | 0.0363 | 4856 |
| Phylogeny variance (male) | 0.0097 | 3.61x10-9 | 0.0355 | 5000 |
| Phylogeny covariance (fem/male) | 0.0014 | -0.0077 | 0.0130 | 4611 |
| Species ID variance (female) | 0.0039 | 1.26x10-10 | 0.0154 | 5000 |
| Species ID variance (male) | 0.0046 | 1.43x10-9 | 0.0171 | 4559 |
| Species ID covariance (fem/male) | 0.0002 | -0.0040 | 0.0048 | 5886 |
| Residual variance (female) | 0.0725 | 0.0488 | 0.0973 | 5000 |
| Residual variance (male) | 0.0737 | 0.0501 | 0.1023 | 5000 |
| Residual covariance (fem/male) | 0.0192 | 0.0013 | 0.0381 | 5000 |
| **7: Sex*Sexual dimorphism** (Condition data only) Without removing outliers | Female | 0.1936 | 0.0858 | 0.3116 | 4793 |
| Male | 0.1344 | 0.0051 | 0.2796 | 5243 |
| Dimorphism | 0.0037 | -0.0306 | 0.0392 | 5000 |
| Sex:Dimorphism | 0.0454 | 0.0003 | 0.0912 | 5000 |
| Publication year (centred mean) | -0.0119 | -0.0225 | 0.0002 | 5000 |
| Phylogeny variance (female) | 0.0067 | 2.53x10-10 | 0.0266 | 5000 |
| Phylogeny variance (male) | 0.0118 | 5.43x10-9 | 0.0399 | 5000 |
| Phylogeny covariance (fem/male) | 0.0021 | -0.0059 | 0.0145 | 4769 |
| Species ID variance (female) | 0.0050 | 3.48x10-10 | 0.0198 | 5000 |
| Species ID variance (male) | 0.0079 | 1.45x10-9 | 0.0265 | 4960 |
| Species ID covariance (fem/male) | 0.0012 | -0.0043 | 0.0092 | 4519 |
| Residual variance (female) | 0.0873 | 0.0595 | 0.1194 | 5000 |
| Residual variance (male) | 0.0698 | 0.0480 | 0.0959 | 4676 |
| Residual covariance (fem/male) | 0.0084 | -0.0107 | 0.0280 | 5000 |

**Table S2.** Summary of parameters along with 95% credible intervals used to construct Figure 2.

| **Model** | **Parameter** | **Sex (*n*)** | **Estimate** | **Lower 95% CI** | **Upper 95%CI** |  |
| --- | --- | --- | --- | --- | --- | --- |
| 1: Sex  (Condition & Fitness combined) | Sex only | F (505) | 0.188 | 0.115 | 0.278 |  |
| M (462) | 0.218 | 0.112 | 0.332 |  |
| 2: Sex*Condition or Fitness (Condition & Fitness separated) | Condition | F (220) | 0.223 | 0.148 | 0.302 |  |
| M (200) | 0.255 | 0.156 | 0.374 |  |
| Fitness | F (285) | 0.137 | 0.061 | 0.217 |  |
| M (262) | 0.155 | 0.045 | 0.273 |  |
| 3: Sex*Condition parameters | Body condition | F (74) | 0.180 | 0.091 | 0.285 |  |
| M (72) | 0.240 | 0.084 | 0.403 |  |
| Body size | F (63) | 0.228 | 0.130 | 0.339 |  |
| M (51) | 0.199 | 0.036 | 0.375 |  |
| Immunity | F (30) | 0.187 | 0.042 | 0.351 |  |
| M (28) | 0.224 | 0.040 | 0.432 |  |
| Stress | F (33) | 0.158 | 0.018 | 0.304 |  |
| M (19) | 0.374 | 0.159 | 0.583 |  |
| Environment | F (11) | 0.303 | 0.109 | 0.487 |  |
| M (21) | 0.318 | 0.120 | 0.525 |  |
| Parasites | F (9) | 0.271 | 0.057 | 0.484 |  |
| M (9) | 0.202 | -0.038 | 0.436 |  |
| 4: Sex*Fitness parameters | Reproductive success | F (123) | 0.181 | 0.076 | 0.315 |  |
| M (121) | 0.160 | 0.057 | 0.285 |  |
| Offspring quality/condition | F (55) | 0.217 | 0.079 | 0.360 |  |
| M (49) | 0.152 | 0.008 | 0.291 |  |
| Parental quality | F (44) | 0.072 | -0.075 | 0.228 |  |
| M (41) | 0.112 | -0.031 | 0.275 |  |
| Timing of breeding | F (39) | 0.144 | -0.004 | 0.287 |  |
| M (33) | 0.170 | 0.032 | 0.317 |  |
| Survival | F (24) | 0.008 | -0.151 | 0.180 |  |
| M (18) | 0.042 | -0.112 | 0.220 |  |

**Table S3.** Summary of an additional general model testing the effect of ‘study type’ (correlational or experimental). Reference level for ‘study type’ is ‘correlational’.

| **Model** | **Parameter** | **Posterior mean** | **Lower 95% CI** | **Upper 95%CI** | **Effective sample size** |
| --- | --- | --- | --- | --- | --- |
|
|  |
| **Sex + Study type**  (Condition & Fitness combined) | Female | 0.1878 | 0.1047 | 0.2719 | 5000 |
| Male | 0.2178 | 0.1097 | 0.3273 | 5000 |
| Study type (experimental) | 0.0226 | -0.0695 | 0.1260 | 5000 |
| Publication year (centred mean) | -0.0062 | -0.0093 | -0.0029 | 5000 |
| Phylogeny variance (female) | 0.0061 | 4.68x10-9 | 0.0167 | 5213 |
| Phylogeny variance (male) | 0.0132 | 4.87x10-8 | 0.0301 | 4347 |
| Phylogeny covariance (fem/male) | 0.0041 | -0.0024 | 0.0141 | 4652 |
| Species ID variance (female) | 0.0047 | 1.14x10-9 | 0.0122 | 4523 |
| Species ID variance (male) | 0.0033 | 1.74x10-10 | 0.0118 | 5000 |
| Species ID covariance (fem/male) | 0.0010 | -0.0026 | 0.0059 | 4510 |
| Residual variance (female) | 0.0662 | 0.0548 | 0.0771 | 5000 |
| Residual variance (male) | 0.0534 | 0.0433 | 0.0645 | 5000 |
| Residual covariance (fem/male) | 0.0150 | 0.0041 | 0.0256 | 5000 |

**Table S4.** Summary of variances per sex transformed into proportions and covariances transformed into correlation coefficients, along with 95% credible intervals.

| **Model** | **Parameter** | **Variance** | **Lower 95% CI** | **Upper 95%CI** | **Posterior mean (*r*)** | **Lower 95% CI** | **Upper 95%CI** |
| --- | --- | --- | --- | --- | --- | --- | --- |
| 1: Sex | Phylogeny | F:0.07 M:0.18 | 2.6x10-9 4.5x10-9 | 0.19 0.37 | 0.4527 | -0.3351 | 0.9885 |
| Species ID | F:0.06 M:0.05 | 3.8x10-7 6.2x10-10 | 0.15 0.17 | 0.2143 | -0.6908 | 0.9767 |
| Residual | F:0.86 M:0.77 | 0.73  0.58 | 0.98 0.94 | 0.2502 | 0.0804 | 0.4228 |
| 2: Sex*Condition or Fitness | Phylogeny | F:0.05 M:0.16 | 6.2x10-9 4.6x10-8 | 0.16 0.36 | 0.3071 | -0.5460 | 0.9941 |
| Species ID | F:0.07 M:0.06 | 2.1x10-9 5.2x10-10 | 0.16 0.19 | 0.1850 | -0.6730 | 0.9670 |
| Residual | F:0.88 M:0.78 | 0.75  0.59 | 0.98 0.94 | 0.2346 | 0.0593 | 0.4026 |
| 3: Sex*Condition parameters | Phylogeny | F:0.05 M:0.20 | 1.4x10-9 4.1x10-9 | 0.19 0.53 | 0.1882 | -0.7108 | 0.9751 |
| Species ID | F:0.08 M:0.16 | 6.1x10-8 5.6x10-11 | 0.23 0.38 | 0.3246 | -0.5853 | 0.9970 |
| Residual | F:0.87 M:0.64 | 0.69  0.39 | 0.99 0.87 | 0.0528 | -0.1454 | 0.2516 |
| 4: Sex*Fitness parameters | Phylogeny | F:0.09 M:0.07 | 3.1x10-8 3.1x10-11 | 0.27 0.23 | 0.1467 | -0.7364 | 0.9507 |
| Species ID | F:0.07 M:0.03 | 1.0x10-7 2.4x10-11 | 0.19 0.12 | 0.0338 | -0.7919 | 0.9225 |
| Residual | F:0.84 M:0.90 | 0.66  0.72 | 0.98  0.99 | 0.2228 | -0.0081 | 0.4533 |
| 5: Sex*Sexual dimorphism (Condition data only)  Removing outliers | Phylogeny | F:0.07 M:0.11 | 1.6x10-9 3.5x10-9 | 0.25 0.34 | 0.1633 | -0.7646 | 0.9597 |
| Species ID | F:0.05 M:0.08 | 1.8x10-8 1.5x10-8 | 0.18 0.25 | 0.1109 | -0.7611 | 0.9658 |
| Residual | F:0.89 M:0.81 | 0.67  0.58 | 0.99  0.99 | 0.0924 | -0.1407 | 0.3443 |
| 6: Sex*Sexual dimorphism (Fitness data only) | Phylogeny | F:0.10 M:0.10 | 2.3x10-8 2.7x10-8 | 0.34 0.32 | 0.1099 | -0.7714 | 0.9609 |
| Species ID | F:0.04 M:0.05 | 1.4x10-9 1.5x10-8 | 0.16 0.18 | 0.0300 | -0.8585 | 0.8801 |
| Residual | F:0.86 M:0.85 | 0.62  0.62 | 0.99  0.99 | 0.2616 | 0.0358 | 0.4752 |
| 7: Sex*Sexual dimorphism (Condition data only)  Without removing outliers | Phylogeny | F:0.06 M:0.12 | 2.5x10-9 9.1x10-8 | 0.23 0.36 | 0.1867 | -0.7065 | 0.9933 |
| Species ID | F:0.05 M:0.08 | 3.1x10-9 1.8x10-8 | 0.18 0.26 | 0.1512 | -0.7237 | 0.9859 |
| Residual | F:0.89 M:0.80 | 0.69  0.56 | 0.99  0.99 | 0.1068 | -0.1301 | 0.3446 |

**Table S5.** Publication bias does occur in data for both sexes, however results for Egger’s tests and trim-and-fill analysis suggest that publication bias is relatively small across models, with very few missing samples (*k*) identified and negligible changes in effect size after correction.

|  |  | Egger's test | | |  | Trim-and-fill method | | | |
| --- | --- | --- | --- | --- | --- | --- | --- | --- | --- |
| Model | Sex | *t* | *df* | *P* |  | *k* | *Zr* | 95% CI |
| 1: Sex  (Condition & Fitness combined) | F | 0.194 | 503 | 0.846 |  | -2 | -0.012 | -0.036 ‒ 0.011 |
| M | -2.969 | 460 | 0.003 |  | 0 | -0.013 | -0.031 ‒ 0.005 |
| 2: Sex*Condition or Fitness | F | -0.300 | 503 | 0.764 |  | -2 | -0.011 | -0.035 ‒ 0.012 |
| M | -3.383 | 460 | 0.001 |  | 0 | -0.011 | -0.029 ‒ 0.007 |
| 3: Sex*Condition parameters | F | 1.996 | 218 | 0.047 |  | -1 | -0.016 | -0.041 ‒ 0.010 |
| M | -5.310 | 198 | <0.0001 |  | 0 | -0.0001 | -0.027 ‒ 0.027 |
| 4: Sex*Fitness parameters | F | -0.268 | 283 | 0.789 |  | 0 | 0.002 | -0.028 ‒ 0.032 |
| M | 0.119 | 260 | 0.905 |  | 0 | -0.016 | -0.038 ‒ 0.006 |
| 5: Sex*Sexual Dimorphism (Condition data only) | F | 0.752 | 103 | 0.454 |  | -2 | -0.020 | -0.062 ‒ 0.022 |
| M | -0.143 | 103 | 0.886 |  | 0 | 0.002 | -0.036 ‒ 0.039 |
| 6: Sex*Sexual Dimorphism (Fitness data only) | F | 0.997 | 107 | 0.321 |  | 0 | -0.010 | -0.048 ‒ 0.027 |
| M | 1.735 | 107 | 0.086 |  | 0 | -0.015 | -0.048 ‒ 0.019 |

Egger’s test results are shown for sex-specific data sets per model (*t* values, degrees of freedom and *P* values), estimated number of missing samples with the sign indicating the direction of bias correction (*k*), mean effect size estimate after correction (*Zr*) together with its 95% credible interval.

**List of full references (Figure 1)**

[1] Quinard, A., Cézilly, F., Motreuil, S., Rossi, J-M. & Biard, C. Reduced sexual dichromatism, mutual ornamentation, and individual quality in the monogamous zenaida dove, *Zenaida aurita*. *J. Avian Biol.* **48**, 489–501 (2017).

[2] Martínez, J. E., Calvo, J. F., Jiménez-Franco, M. V., Zuberogoitia, I. & López-López, P. Colour morph does not predict brood size in the booted eagle. *Ornis Fenn.* **93**, 130–136 (2016).

[3] Penteriani, V., Alonso-Alvarez, C., del Mar Delgado, M., Sergio, F. & Ferrer M. Brightness variability in the white badge of the eagle owl *Bubo bubo*. *J. Avian Biol.* **37**, 110–116 (2006).

[4] Avilés, J. M. & Parejo, D. Covariation between bill colouration and fitness components in a nocturnal bird. *J. Avian Biol.* **43**, 565–570 (2012).

[5] Roulin, A., Richner, H. & Ducrest, A-L. Genetic, environmental, and condition-dependent effects on female and male ornamentation in the barn owl *Tyto alba*. *Evolution* **52**, 1451–1460 (1998).

[6] Roulin, A., Jungi, T. W., Pfister, H. & Dijkstra, C. Female barn owls (*Tyto alba*) advertise good genes. *Proc. R. Soc. Lond. B* **267**, 937–941 (2000).

[7] Roulin, A., Dijkstra, C., Riols, C. & Ducrest, A-L. Female- and male-specific signals of quality in the barn owl. *J. Evol. Biol.* **14**, 255–266 (2001a).

[8] Roulin, A., Riols, C., Dijkstra, C. & Ducrest, A-L. Female plumage spottiness signals parasite resistance in the barn owl (*Tyto alba*). *Behav. Ecol.* **12**, 103–110 (2001b).

[9] Roulin, A., Ducrest, A-L., Balloux, F., Dijkstra, C. & Riols, C. A female melanin ornament signals offspring fluctuating asymmetry in the barn owl. *Proc. R. Soc. Lond. B* **270**, 167–171 (2003).

[10] Roulin, A. Proximate basis of the covariation between a melanin-based female ornament and offspring quality. *Oecologia* **140**, 668–675 (2004).

[11] Roulin, A. Covariation between eumelanic pigmentation and body mass only under specific conditions. *Naturwissenschaften* **96**, 375–382 (2009).

[12] Dreiss, A., Henry, I., Ruppli, C., Almasi, B. & Roulin, A. Darker eumelanic barn owls better withstand food depletion through resistance to food deprivation and lower appetite. *Oecologia* **164**, 65–71 (2010).

[13] Almasi, B., Roulin, A., Korner-Nievergelt, F., Jenni-Eiermann, S. & Jenni, L. Coloration signals the ability to cope with elevated stress hormones: effects of corticosterone on growth of barn owls are associated with melanism. *J. Evol. Biol.* **25**, 1189–1199 (2012).

[14] van den Brink, V., Dolivo, V., Falourd, X., Dreiss, A. N. & Roulin, A. Melanic color-dependent antipredator behavior strategies in barn owl nestlings. *Behav. Ecol.* **23**, 473–480 (2012).

[15] Wiebe, K. L. Assortative mating by color in a population of hybrid northern flickers. *Auk* **117**, 525–529 (2000).

[16] Murphy, T. G. Racketed tail of the male and female turquoise-browed motmot: male but not female tail length correlates with pairing success, performance, and reproductive success. *Behav. Ecol. Sociobiol*. **61**, 911–918 (2007).

[17] Murphy, T. G. & Pham, T. T. Condition and brightness of structural blue-green: motmot tail-racket brightness is related to speed of feather growth in males, but not in females. *Biol. J. Linn. Soc.* **106**, 673–681 (2012).

[18] Silva, N., Avilés, J. M., Danchin, E. & Parejo, D. Informative content of multiple plumage-coloured traits in female and male European rollers. *Behav. Ecol. Sociobiol.* **62**, 1969 (2008).

[19] Tella, J. L., Forfero, M. G., Donázar, J. A. & Hiraldo, F. Is the expression of male traits in female lesser kestrels related to sexual selection? *Ethology* **103**, 72–81 (1997).

[20] Vergara, P., Fargallo, J., Martínez-Padilla, J. & Lemus, J. Inter-annual variation and information content of melanin-based coloration in female Eurasian kestrels. *Biol. J. Linn. Soc.* **97**, 781–790 (2009).

[21] Parejo, D., Silva, N., Danchin, É. & Avilés, J. M. Informative content of melanin-based plumage colour in adult Eurasian kestrels. *J. Avian Biol.* **42**, 49–60 (2011).

[22] Vergara, P., Fargallo, J. A. & Martínez-Padilla, J. Genetic basis and fitness correlates of dynamic carotenoid-based ornamental coloration in male and female common kestrels *Falco tinnunculus*. *J. Evol. Biol.* **28**, 146–154 (2015).

[23] López-Idiáquez, D., Vergara, P., Fargallo, J. A. & Martínez-Padilla, J. Old males reduce melanin-pigmented traits and increase reproductive outcome under worse environmental conditions in common kestrels. *Ecol. Evol.* **6**, 1224–1235 (2016).

[24] Van Rooij, E. P. & Griffith, S. C. No evidence of assortative mating on the basis of putative ornamental traits in long-tailed finches *Poephila acuticauda*. *Ibis* **154**, 444–451 (2012).

[25] Simons, M. J. P. et al. Bill redness is positively associated with reproduction and survival in male and female zebra finches. *PloS One* **7**, e40721 (2012).

[26] Funghi, C., Trigo, S., Gomes, A. C. R., Soares, M. C. & Cardoso, G. C. Release from ecological constraint erases sex difference in social ornamentation. *Behav. Ecol. Sociobiol.* **72**, 67 (2018).

[27] Pilastro, A., Griggio, M. & Matessi, G. Male rock sparrows adjust their breeding strategy according to female ornamentation: parental or mating investment? *Anim. Behav.* **66**, 265–271 (2003).

[28] Griggio, M., Zanollo, V. & Hoi, H. Female ornamentation, parental quality, and competitive ability in the rock sparrow. *J. Ethol.* **28**, 455–462 (2010).

[29] García-Navas, V., García del Rincón, A., Ferrer, E. S. & Fathi, H. Mating strategies, parental investment and mutual ornamentation in Iberian rock sparrows (*Petronia petronia*). *Behaviour* **150**, 1641–1663 (2013).

[30] Cantarero, A., López-Arrabé, J., Palma, A. & Moreno, J. Oxidative status in nestlings shows different associations with parental carotenoid-based plumage ornaments depending on parental sex and year: a study of rock sparrows *Petronia petronia*. *Ethol. Ecol. Evol*. **29**, 521–541 (2017).

[31] Linville, S. U., Breitwisch, R. & Schilling, A. J. Plumage brightness as an indicator of parental care in northern cardinals. *Anim. Behav.* **55**, 119–127 (1998).

[32] Jawor, J. M. & Breitwisch, R. Multiple ornaments in male northern cardinals, *Cardinalis cardinalis*, as indicators of condition. *Ethology* **110**, 113–126 (2004).

[33] Jawor, J. M., Gray, N., Beall, S. M. & Breitwisch, R. Multiple ornaments correlate with aspects of condition and behaviour in female northern cardinals, *Cardinalis cardinalis.* *Anim. Behav*. **67**, 875–882 (2004).

[34] Grunst, A. S. et al. Disruptive selection on plumage colouration across genetically determined morphs. *Anim. Behav*. **124**, 97–108 (2017).

[35] Grunst, A. S., Rotenberry, J. T. & Grunst, M. L. Age-dependent relationships between multiple sexual pigments and condition in males and females. *Behav. Ecol*. **25**, 276–287 (2014).

[36] Reudink, M. W., Marra, P. P., Boag, P. T. & Ratcliffe, L. M. Plumage coloration predicts paternity and polygyny in the American redstart. *Anim. Behav.* **77**, 495–501 (2009a).

[37] Reudink, M. W., Studds, C. E., Marra, P. P., Kurt Kyser, T. & Ratcliffe, L. M. Plumage brightness predicts non-breeding season territory quality in a long-distance migratory songbird, the American redstart *Setophaga ruticilla*. *J. Avian Biol.* **40**, 34–41 (2009b).

[38] Germain, R. R., Reudink, M. W., Marra, P. P. & Ratcliffe, L. M. Carotenoid-based male plumage predicts parental investment in the American redstart. *Wilson J. Ornithol.* **122**, 318–325 (2010).

[39] Osmond, M. M. et al. Relationships between carotenoid-based female plumage and age, reproduction and mate color in the American redstart (*Setophaga ruticilla*). *Can. J. Zool*. **91**, 589–595 (2013).

[40] Bulluck, L. P. et al. Feather carotenoid content is correlated with reproductive success and provisioning rate in female prothonotary warblers. *Auk* **134**, 229–239 (2017).

[41] Slevin, M. C., Bulluck, L. P., Matthews, A. E. & Boves, T. J. Spatial variation in carotenoid plumage coloration and relationships between female coloration and quality in prothonotary warblers (*Protonotaria citrea*). *Auk* **136**, ukz011 (2019).

[42] Dunn, P. O., Garvin, J. C., Whittingham, L. A., Freeman-Gallant, C. R. & Hasselquist, D. Carotenoid and melanin-based ornaments signal similar aspects of male quality in two populations of the common yellowthroat. *Funct. Ecol.* **24**, 149–158 (2010).

[43] Freeman-Gallant, C. R. et al. Sexual selection, multiple male ornaments, and age- and condition-dependent signaling in the common yellowthroat. *Evolution* **64**, 1007–1017 (2010).

[44] Freeman-Gallant, C. R. et al. Oxidative damage to DNA related to survivorship and carotenoid-based sexual ornamentation in the common yellowthroat. *Biol. Lett*. **7**, 429–432 (2011).

[45] Freeman-Gallant, C. R., Schneider, R. L., Taff, C. C., Dunn, P. O. & Whittingham, L. A. Contrasting patterns of selection on the size and coloration of a female plumage ornament in common yellowthroats. *J. Evol. Biol.* **27**, 982–991 (2014).

[46] Eckert, C. G. & Weatherhead, P. J. Male characteristics, parental quality and the study of mate choice in the red-winged blackbird (*Agelaius phoeniceus*). *Behav. Ecol. Sociobiol.* **20**, 35–42 (1987).

[47] Muma, K. E. & Weatherhead, P. J. Male traits expressed in females: direct or indirect sexual selection? *Behav. Ecol. Sociobiol.* **25**, 23–31 (1989).

[48] Cabezas, S., Tella, J. L., Carrete, M. & Bortolotti, G. R. Is the rufous axillary patch of the screaming cowbird a secondary sexual character? *Ardeola* **58**, 309–313 (2011).

[49] Rosen, R. F. & Tarvin, K. A. Sexual signals of the male American goldfinch. *Ethology* **112**,1008–1019 (2006).

[50] Kelly, R. J., Murphy, T. G., Tarvin, K. A. & Burness, G. Carotenoid-based ornaments of female and male American goldfinches (*Spinus tristis*) show sex-specific correlations with immune function and metabolic rate. *Physiol. Biochem. Zool.* **85**, 348–363 (2012).

[51] Tarvin, K. A. et al. Dynamic status signal reflects outcome of social interactions, but not energetic stress. *Front. Ecol. Evol.* **4**, 79 (2016).

[52] Hill, G. E. Female house finches prefer colourful males: sexual selection for a condition-dependent trait. *Anim. Behav.* **40**, 563–572 (1990).

[53] Hill, G. E. Plumage coloration is a sexually selected indicator of male quality. *Nature* **350**, 337–339 (1991).

[54] Hill, G. E. Male mate choice and the evolution of female plumage coloration in the house finch. *Evolution* **47**, 1515–1525 (1993).

[55] Amundsen, T., Forsgren, E. & Hansen, L. T. T. On the function of female ornaments: male bluethroats prefer colourful females. *Proc. R. Soc. Lond. B* **264**, 1579-1586 (1997).

[56] Johnsen, A., Andersson, S., Örnborg, J. & Lifjeld, J. T. Ultraviolet plumage ornamentation affects social mate choice and sperm competition in bluethroats (Aves: *Luscinia s. svecica*): a field experiment. *Proc. R. Soc. Lond. B* **265**, 1313–1318 (1998).

[57] Smiseth, P. T. & Amundsen, T. Does female plumage coloration signal parental quality? A male removal experiment with the bluethroat (*Luscinia s. svecica*). *Behav. Ecol. Sociobiol.* **47**, 205–212 (2000).

[58] Johnsen, A., Lifjeld, J., Andersson, S., Örnborg, J. & Amundsen, T. Male characteristics and fertilisation success in bluethroats. *Behaviour* **138**, 1371–1390 (2001).

[59] Pärn, H., Lifjeld, J. T. & Amundsen, T. Female throat ornamentation does not reflect cell-mediated immune response in bluethroats *Luscinia s. svecica*. *Oecologia* **146**, 496–504 (2005).

[60] Potti, J. & Montalvo, S. Male arrival and female mate choice in the pied flycatcher *Ficedula hypoleuca* in central Spain. *Ornis Scand*. **22**, 45–54 (1991).

[61] Potti, J. & Merino, S. Decreased levels of blood trypanosome infection correlate with female expression of a male secondary sexual trait: implications for sexual selection. *Proc. R. Soc. Lond. B* **263**, 1199–1204 (1996).

[62] Gil, D., Lacroix, A. & Potti, J. Within-clutch variation in yolk androgens in relation to female expression of a male ornament in pied flycatchers *Ficedula hypoleuca*. *Ardeola* **53**, 307–315 (2006).

[63] Morales, J. et al. Female ornaments in the pied flycatcher *Ficedula hypoleuca*: associations with age, health and reproductive success. *Ibis* **149**, 245–254 (2007).

[64] Canal, D., Dávila, J. & Potti, J. Male phenotype predicts extra-pair paternity in pied flycatchers. *Behaviour* **148**, 691–712 (2011).

[65] Ruiz-de-Castañeda, R., Burtt, E. H., González-Braojos, S. & Moreno, J. Bacterial degradability of an intrafeather unmelanized ornament: a role for feather-degrading bacteria in sexual selection? *Biol. J. Linn. Soc.* **105**, 409–419 (2012).

[66] Potti, J., Canal, D. & Serrano, D. Lifetime fitness and age-related female ornament signalling: evidence for survival and fecundity selection in the pied flycatcher. *J. Evol. Biol.* **26**, 1445–1457 (2013).

[67] López-Arrabé, J., Cantarero, A., Pérez-Rodríguez, L., Palma, A. & Moreno, J. Plumage ornaments and reproductive investment in relation to oxidative status in the pied flycatcher (*Ficedula hypoleuca iberiae)*. *Can. J. Zool.* **92**, 1019–1027 (2014).

[68] Moreno, J., Cantarero, A., Plaza, M. & Lopez-Arrabé, J. Phenotypic plasticity in breeding plumage signals in both sexes of a migratory bird: responses to breeding conditions. *J. Avian Biol.* **50**, 1–11 (2019).

[69] Török, J., Hegyi, G. & Garamszegi, L. Z. Depigmented wing patch size is a condition-dependent indicator of viability in male collared flycatchers. *Behav. Ecol.* **14**, 382–388 (2003).

[70] Hegyi, G. et al. Phenotypic plasticity in a conspicuous female plumage trait: information content and mating patterns. *Anim. Behav.* **75**, 977–989 (2008).

[71] Kiss, D., Hegyi, G., Török, J. & Rosivall, B. The relationship between maternal ornamentation and feeding rate is explained by intrinsic nestling quality. *Behav. Ecol. Sociobiol.* **67**, 185–192 (2013).

[72] Laczi, M. et al. Integrated plumage colour variation in relation to body condition, reproductive investment and laying date in the collared flycatcher. *Naturwissenschaften* **100**, 983–991 (2013).

[73] Kötél, D., Laczi, M., Török, J. & Hegyi, G. Mutual ornamentation and the parental behaviour of male and female collared flycatchers *Ficedula albicollis* during incubation. *Ibis* **158**, 796–807 (2016).

[74] Laczi, M., Kötél, D., Török, J. & Hegyi, G. Mutual plumage ornamentation and biparental care: consequences for success in different environments. *Behav. Ecol.* **28**, 1359–1368 (2017).

[75] Rowe, K. M. & Weatherhead, P. J. Assortative mating in relation to plumage traits shared by male and female American robins. *Condor* **113**, 881–889 (2011).

[76] Balenger, S. L., Johnson, L. S., Brubaker, J. L. & Ostlind, E. Parental effort in relation to structural plumage coloration in the mountain bluebird (*Sialia currucoides*). *Ethology* **113**, 838–846 (2007).

[77] Morrison, A., Flood, N. J. & Reudink, M. W. Reproductive correlates of plumage coloration of female mountain bluebirds: female mountain bluebird coloration. *J. Field Ornithol.* **85**, 168–179 (2014).

[78] Siefferman, L. & Hill, G. E. Structural and melanin coloration indicate parental effort and reproductive success in male eastern bluebirds. *Behav. Ecol.* **14**, 855–861 (2003).

[79] Siefferman, L. & Hill, G. E. Evidence for sexual selection on structural plumage coloration in female eastern bluebirds (*Sialia sialis*). *Evolution* **59**, 1819–1828 (2005).

[80] Komdeur, J., Oorebeek, M., van Overveld, T. & Cuthill, I. C. Mutual ornamentation, age, and reproductive performance in the European starling. *Behav. Ecol.* **16**, 805–817 (2005).

[81] Delhey, K. & Kempenaers, B. Age differences in blue tit *Parus caeruleus* plumage colour: within-individual changes or colour-biased survival? *J. Avian Biol.* **37**, 339–348 (2006).

[82] Hidalgo-Garcia, S. The carotenoid-based plumage coloration of adult blue tits *Cyanistes caeruleus* correlates with the health status of their brood. *Ibis* **148**, 727–734 (2006).

[83] Doutrelant, C. et al. Female coloration indicates female reproductive capacity in blue tits. *J. Evol. Biol.* **21**, 226–233 (2008).

[84] Doutrelant, C., Grégoire, A., Midamegbe, A., Lambrechts, M. & Perret, P. Female plumage coloration is sensitive to the cost of reproduction. An experiment in blue tits. *J. Anim. Ecol.* **81**, 87–96 (2012).

[85] Henderson, L. J., Heidinger, B. J., Evans, N. P. & Arnold, K. E. Ultraviolet crown coloration in female blue tits predicts reproductive success and baseline corticosterone. *Behav. Ecol*. **24**, 1299–1305 (2013).

[86] Limbourg, T., Mateman, A. C. & Lessells, C. M. Parental care and UV coloration in blue tits: opposite correlations in males and females between provisioning rate and mate’s coloration. *J. Avian Biol.* **44**, 017–026. (2013).

[87] Lucass, C., Iserbyt, A., Eens, M. & Müller, W. Structural (UV) and carotenoid-based plumage coloration - signals for parental investment? *Ecol. Evol.* **6**, 3269–3279 (2016).

[88] Hõrak, P., Ots, I., Vellau, H., Spottiswoode, C. & Møller, A. P. Carotenoid-based plumage coloration reflects hemoparasite infection and local survival in breeding great tits. *Oecologia* **126**, 166–173 (2001).

[89] Ferns, P. N. & Hinsley, S. A. Immaculate tits: head plumage pattern as an indicator of quality in birds. *Anim. Behav*. **67**, 261–272 (2004).

[90] Mänd, R., Tilgar, V. & Møller, A. P. Negative relationship between plumage colour and breeding output in female great tits, *Parus major*. *Evol. Ecol. Res*. **7**, 1013−1023 (2005).

[91] Remeš, V., Matysioková, B. & Klejdus, B. Egg yolk antioxidant deposition as a function of parental ornamentation, age, and environment in great tits *Parus major*. *J. Avian Biol.* **42**, 387–396 (2011).

[92] Kilgas, P. et al. Variation in assemblages of feather bacteria in relation to plumage color in female great tits. *Condor* **114**, 606–611 (2012).

[93] Pickett, S. R. A., Weber, S. B., McGraw, K. J., Norris, K. J. & Evans, M. R. Environmental and parental influences on offspring health and growth in great tits (*Parus major*). *PLoS One* **8**, e69695 (2013).

[94] Remeš, V. & Matysioková, B. More ornamented females produce higher-quality offspring in a socially monogamous bird: an experimental study in the great tit (*Parus major*). *Front. Zool.* **10**, 14 (2013).

[95] Losdat, S. et al. Effects of an early-life paraquat exposure on adult resistance to oxidative stress, plumage colour and sperm performance in a wild bird. *J. Anim. Ecol*. **87**, 1137–1148 (2018).

[96] Surmacki, A., Stępniewski, J. & Stępniewska, M. Juvenile sexual dimorphism, dichromatism and condition-dependent signaling in a bird species with early pair bonds. *J. Ornithol*. **156**, 65–73 (2015).

[97] van Dijk, R. E., Robles, R., Groothuis, T. G. G. , de Vries, B. & Eising, C. M. Reproductive effort of both male and female bar-throated *Apalis Apalis thoracica* is predicted by ornamentation of self and mate. *Ibis* **157**, 731–742 (2015).

[98] Bitton, P-P., Dawson, R. D. & Ochs, C. L. Plumage characteristics, reproductive investment and assortative mating in tree swallows *Tachycineta bicolor*. *Behav. Ecol. Sociobiol.* **62**, 1543–1550 (2008).

[99] Bentz, A. B. & Siefferman, L. Age-dependent relationships between coloration and reproduction in a species exhibiting delayed plumage maturation in females. *J. Avian Biol.* **44**, 080–088 (2013).

[100] Beck, M. L., Hopkins, W. A. & Hawley, D. M. Relationships among plumage coloration, blood selenium concentrations and immune responses of adult and nestling tree swallows. *J. Exp. Biol.* **218**, 3415–3424 (2015).

[101] Griebel, I. A. & Dawson, R. D. Predictors of nestling survival during harsh weather events in an aerial insectivore, the tree swallow (*Tachycineta bicolor*). *Can. J. Zool.* **97**, 81–90 (2019).

[102] Møller, A. P. Female choice selects for male sexual tail ornaments in the monogamous swallow. *Nature* **332**, 640–642 (1988).

[103] Møller, A. P. Sexual selection in the monogamous barn swallow (*Hirundo rustica*). II. Mechanisms of sexual selection. *J. Evol. Biol.* **5**, 603–624 (1992).

[104] Møller, A. P. Sexual selection in the barn swallow *Hirundo rustica*. III. Female tail ornaments. *Evolution* **47**, 417–431 (1993).

[105] Cuervo, J. J., Møller, A. P. & de Lope, F. Experimental manipulation of tail length in female barn swallows (*Hirundo rustica*) affects their future reproductive success. *Behav. Ecol*. **14**, 451–456 (2003).

[106] Safran, R. J. & McGraw, K. J. Plumage coloration, not length or symmetry of tail-streamers, is a sexually selected trait in north American barn swallows. *Behav. Ecol*. **15**, 455–461 (2004).

[107] Vortman, Y., Lotem, A., Dor, R., Lovette, I. J. & Safran, R. J. The sexual signals of the East-Mediterranean barn swallow: a different swallow tale. *Behav. Ecol*. **22**, 1344–1352 (2011).

[108] Saino, N. et al. Viability is associated with melanin-based coloration in the barn swallow (*Hirundo rustica*). *PloS One* **8**, e60426 (2013).

[109] Hasegawa, M., Arai, E., Watanabe, M. & Nakamura, M. Colourful males hold high quality territories but exhibit reduced paternal care in barn swallows. *Behaviour* **151**, 591–612 (2014).

[110] Hasegawa, M., Arai, E., Ito, S. & Wakamatsu, K. High brood patch temperature of less colourful, less pheomelanic female barn swallows *Hirundo rustica*. *Ibis* **158**, 808–820 (2016).

[111] Liu, Y., Scordato, E. S. C., Safran, R. & Evans M. Ventral colour, not tail streamer length, is associated with seasonal reproductive performance in a Chinese population of barn swallows (*Hirundo rustica gutturalis*). *J. Ornithol*. **159**, 675–685 (2018).

[112] Fitzpatrick, S. & Price, P. Magpies' tails: damage as an indicator of quality. *Behav. Ecol. Sociobiol.* **40**, 209–212 (1997).

[113] Blanco, G. & de la Puente, J. Multiple elements of the black-billed magpie's tail correlate with variable honest information on quality in different age/sex classes. *Anim. Behav*. **63**, 217–225 (2002).

[114] Blanco, G. & Fargallo, J. A. Wing whiteness as an indicator of age, immunocompetence, and testis size in the Eurasian black-billed magpie (*Pica pica*). *Auk* **130**, 399–407 (2013).

[115] Regosin, J. V. & Pruett-Jones, S. Sexual selection and tail-length dimorphism in scissor-tailed flycatchers. *Auk* **118**, 167–175 (2001).

[116] McGraw, K. J., Massaro, M., Rivers, T. J. & Mattern, T. Annual, sexual, size- and condition-related variation in the colour and fluorescent pigment content of yellow crest-feathers in Snares penguins (*Eudyptes robustus*). *Emu* **109**, 93–99 (2009).

[117] Massaro, M., Davis, L. S. & Darby, J. T. Carotenoid-derived ornaments reflect parental quality in male and female yellow-eyed penguins (*Megadyptes antipodes*). *Behav. Ecol. Sociobiol.* **55**, 169–175 (2003).

[118] Dobson, F. S., Couchoux, C. & Jouventin, P. Sexual selection on a coloured ornament in king penguins. *Ethology* **117**, 872–879 (2011).

[119] Keddar, I., Couchoux, C., Jouventin, P. & Dobson, F. S. Variation of mutual colour ornaments of king penguins in response to winter resource availability. *Behaviour* **152**, 1679–1700 (2015).

[120] Viblanc, V. A. et al. Mutually honest? Physiological ‘qualities’ signalled by colour ornaments in monomorphic king penguins. *Biol. J. Linn. Soc*. **118**, 200–214 (2016).

[121] Krebs, E., Hunte, W. & Green, D. Plume variation, breeding performance and extra-pair copulations in the cattle egret. *Behaviour* **141**, 479–499 (2004).

[122] Daunt, F., Monaghan, P., Wanless, S. & Harris, M. P. Sexual ornament size and breeding performance in female and male European shags *Phalacrocorax aristotelis*. *Ibis* **145**, 54–60 (2003).

[123] Childress, R. B. & Bennun, L. A. Sexual character intensity and its relationship to breeding timing, fecundity and mate choice in the great cormorant *Phalacrocorax carbo lucidus*. *J. Avian Biol*. **33**, 23–30 (2002).

[124] Montoya, B., Valverde, M., Rojas, E. & Torres, R. Oxidative stress during courtship affects male and female reproductive effort differentially in a wild bird with biparental care. *J. Exp. Biol*. **219**, 3915–3926 (2016).

[125] Amat, J. A. et al. Dynamic signalling using cosmetics may explain the reversed sexual dichromatism in the monogamous greater flamingo. *Behav. Ecol. Sociobiol*. **72**, 135 (2018).

[126] Amat, J. A. Does the expression of a male plumage trait in female Kentish plovers (*Charadrius alexandrinus*) signal individual quality? *J. Ornithol*. **146**, 287–290 (2005).

[127] Hanssen, S. A. et al. Individual quality and reproductive effort mirrored in white wing plumage in both sexes of south polar skuas. *Behav. Ecol*. **20**, 961–966 (2009).

[128] Doutrelant, C. Colouration in Atlantic puffins and blacklegged kittiwakes: monochromatism and links to body condition in both sexes. *J. Avian Biol*. **44**, 451–460 (2013).

[129] Jones, I. L., Hunter, F. M. & Fraser, G. Patterns of variation in ornaments of crested auklets *Aethia cristatella*. *J. Avian Biol*. **31**, 119–127 (2000).

[130] Douglas, H. D., Kitaysky, A. S., Kitaiskaia, E. V., Maccormick, A. & Kelly, A. Size of ornament is negatively correlated with baseline corticosterone in males of a socially monogamous colonial seabird. *J. Comp. Physiol. B* **179**, 297 (2009).

[131] Klenova, A. V., Zubakin, V. A. & Zubakina, E. V. Vocal and optical indicators of individual quality in a social seabird, the crested auklet (*Aethia cristatella*). *Ethology* **117**, 356–365 (2011).

[132] Palestis, B. G., Nisbet, I. C. T., Hatch, J.J., Arnold, J. M. & Szczys, P. Tail length and sexual selection in a monogamous, monomorphic species, the roseate tern *Sterna dougallii*. *J. Ornithol*. **153**, 1153–1163 (2012).

[133] Velando, A., Lessells, C. M. & Márquez, J. C. The function of female and male ornaments in the Inca tern: evidence for links between ornament expression and both adult condition and reproductive performance. *J. Avian Biol*. **32**, 311–318 (2001).

[134] Sepp, T. et al. A small badge of longevity: opposing survival selection on the size of white and black wing markings. *J. Avian Biol*. **48**, 570–580 (2017).

[135] Pardal, S., Alves, J. A., Mota, P. G. & Ramos, J. A. Dressed to impress: breeding plumage as a reliable signal of innate immunity. *J. Avian Biol*. **49**, e01579 (2018).

[136] Piersma, T. et al. Breeding plumage honestly signals likelihood of tapeworm infestation in females of a long-distance migrating shorebird, the bar-tailed godwit. *Zoology* **104**, 41–48 (2001).

[137] Blizard, M. & Pruett-Jones, S. Plumage pattern dimorphism in a shorebird exhibiting sex-role reversal (*Actitis macularius*). *Auk* **134**, 363–376 (2017).

[138] Veit, A. C. & Jones, I. L. Function of tail streamers of red-tailed tropicbirds (*Phaethon rubricauda*) as inferred from patterns of variation. *Auk* **120**, 1033–1043 (2003).

[139] Mougeot, F., Irvine, J. R., Seivwright, L., Redpath, S. M. & Piertney, S. Testosterone, immunocompetence, and honest sexual signaling in male red grouse. *Behav. Ecol.* **15**, 930–937 (2004).

[140] Mougeot, F., Redpath, S. M. & Leckie, F. Ultra-violet reflectance of male and female red grouse, *Lagopus lagopus scoticus*, sexual ornaments reflect nematode parasite intensity. *J. Avian Biol*. **36**, 203–209 (2005).

[141] Martínez-Padilla, J. et al. Condition- and parasite-dependent expression of a male-like trait in a female bird. *Biol. Lett.* **7**, 364–367 (2011).

[142] Vergara, P., Martínez-Padilla, J., Redpath, S. M. & Mougeot, F. The ornament-condition relationship varies with parasite abundance at population level in a female bird. *Naturwissenschaften* **98**, 897–902 (2011).

[143] Vergara, P., Redpath, S. M., Martínez-Padilla, J. & Mougeot, F. Environmental conditions influence red grouse ornamentation at a population level. *Biol. J. Linn. Soc.* **107**, 788–798 (2012).

[144] Legagneux, P., Théry, M., Guillemain, M., Gomez, D. & Bretagnolle, V. Condition dependence of iridescent wing flash-marks in two species of dabbling ducks. *Behav. Process.* **83**, 324–330 (2010).

[145] Butler, M. W. & McGraw, K. J. Past or present? Relative contributions of developmental and adult conditions to adult immune function and coloration in mallard ducks (*Anas platyrhynchos*). *J. Comp. Physiol. B* **181**, 551–563 (2011).

[146] Hanssen, S. A., Folstad, I. & Erikstad, K. E. White plumage reflects individual quality in female eiders. *Anim. Behav*. **71**, 337–343 (2006).

[147] Hanssen, S. A., Hasselquist, D., Folstad, I. & Erikstad, K. E. A label of health: a previous immune challenge is reflected in the expression of a female plumage trait. *Biol. Lett.* **4**, 379–381 (2008).

[148] Lehikoinen, A., Jaatinen, K. & Öst, M. Do female ornaments indicate quality in eider ducks? *Biol. Lett.* **6**, 225–228 (2010).

[149] Gladbach, A., Gladbach, D. J., Kempenaers, B. & Quillfeldt, P. Female-specific colouration, carotenoids and reproductive investment in a dichromatic species, the upland goose *Chloephaga picta leucoptera*. *Behav. Ecol. Sociobiol.* **64**, 1779–1789 (2010).

[150] Kraaijeveld, K., Gregurke, J., Hall, C., Komdeur, J. & Mulder, R. A. Mutual ornamentation, sexual selection, and social dominance in the black swan. *Behav. Ecol*. **15**, 380–389 (2004).
